# Supplementary material
Source: publisher figshare collection journal article supplement (https://acs.figshare.com/ndownloader/files/11878610)
Supplement: Supplementary file 1 [file 11878610]

Cytotoxic Drimane Sesquiterpenoids Isolated from *Perenniporia maackiae*

Jaeyoung Kwon,<sup>†</sup> Hyaemin Lee,<sup>‡</sup> Young Hye Seo,<sup>‡,§,⊥</sup> Jieun Yun,<sup>||</sup> Jun Lee,<sup>§,⊥</sup> Hak Cheol Kwon,<sup>†</sup> Yuanqiang Guo,<sup>▽</sup> Jong Soon Kang,<sup>○</sup> Jae-Jin Kim,<sup>□</sup> and Dongho Lee<sup>\*,‡</sup>

<sup>†</sup>Natural Constituents Research Center, Korea Institute of Science and Technology (KIST) Gangneung Institute, Gangneung 25451, Republic of Korea

<sup>‡</sup>Department of Biosystems and Biotechnology and <sup>□</sup>Division of Environmental Science and Ecological Engineering, College of Life Sciences and Biotechnology, Korea University, Seoul 02841, Republic of Korea

<sup>§</sup>Herbal Medicine Research Division, Korea Institute of Oriental Medicine, Daejeon 34054, Republic of Korea

<sup>⊥</sup>Convergence Research Center for Diagnosis, Treatment and Care System of Dementia, Korea Institute of Science and Technology, Seoul 02792, Republic of Korea

<sup>||</sup>Department of Pharmaceutical Engineering, Cheongju University, Cheongju, 28503, Republic of Korea

<sup>▽</sup>State Key Laboratory of Medicinal Chemical Biology, College of Pharmacy, and Tianjin Key Laboratory of Molecular Drug Research, Nankai University, Tianjin 300353, People's Republic of China

<sup>○</sup>Laboratory Animal Resource Center, Korea Research Institute of Bioscience and Biotechnology, Cheongju 28116, Republic of Korea

## List of Supporting Information

- S1.**  $^1\text{H}$  NMR spectrum (500 MHz) of 6-*epi*-pereniporin A (**1**) in  $\text{CD}_3\text{OD}$ .
- S2.**  $^{13}\text{C}$  NMR spectrum (125 MHz) of 6-*epi*-pereniporin A (**1**) in  $\text{CD}_3\text{OD}$ .
- S3.** HSQC NMR spectrum of 6-*epi*-pereniporin A (**1**) in  $\text{CD}_3\text{OD}$ .
- S4.** HMBC NMR spectrum of 6-*epi*-pereniporin A (**1**) in  $\text{CD}_3\text{OD}$ .
- S5.** COSY NMR spectrum of 6-*epi*-pereniporin A (**1**) in  $\text{CD}_3\text{OD}$ .
- S6.** NOESY NMR spectrum of 6-*epi*-pereniporin A (**1**) in  $\text{CD}_3\text{OD}$ .
- S7.** HRESIMS spectrum of 6-*epi*-pereniporin A (**1**).
- S8.**  $^1\text{H}$  NMR spectrum (500 MHz) of 6-*epi-O*-methyl-pereniporin A (**2**) in  $\text{CD}_3\text{OD}$ .
- S9.**  $^{13}\text{C}$  NMR spectrum (125 MHz) of 6-*epi-O*-methyl-pereniporin A (**2**) in  $\text{CD}_3\text{OD}$ .
- S10.** HSQC NMR spectrum of 6-*epi-O*-methyl-pereniporin A (**2**) in  $\text{CD}_3\text{OD}$ .
- S11.** HMBC NMR spectrum of 6-*epi-O*-methyl-pereniporin A (**2**) in  $\text{CD}_3\text{OD}$ .
- S12.** COSY NMR spectrum of 6-*epi-O*-methyl-pereniporin A (**2**) in  $\text{CD}_3\text{OD}$ .
- S13.** NOESY NMR spectrum of 6-*epi-O*-methyl-pereniporin A (**2**) in  $\text{CD}_3\text{OD}$ .
- S14.** HRESIMS spectrum of 6-*epi-O*-methyl-pereniporin A (**2**).
- S15.**  $^1\text{H}$  NMR spectrum (500 MHz) of 6-*O*-methyl-pereniporin A (**3**) in  $\text{CD}_3\text{OD}$ .
- S16.**  $^{13}\text{C}$  NMR spectrum (125 MHz) of 6-*O*-methyl-pereniporin A (**3**) in  $\text{CD}_3\text{OD}$ .
- S17.** HSQC NMR spectrum of 6-*O*-methyl-pereniporin A (**3**) in  $\text{CD}_3\text{OD}$ .
- S18.** HMBC NMR spectrum of 6-*O*-methyl-pereniporin A (**3**) in  $\text{CD}_3\text{OD}$ .
- S19.** COSY NMR spectrum of 6-*O*-methyl-pereniporin A (**3**) in  $\text{CD}_3\text{OD}$ .
- S20.** NOESY NMR spectrum of 6-*O*-methyl-pereniporin A (**3**) in  $\text{CD}_3\text{OD}$ .
- S21.** HRESIMS spectrum of 6-*O*-methyl-pereniporin A (**3**).
- S22.**  $^1\text{H}$  NMR spectrum (500 MHz) of 3 $\beta$ -hydroxy-6-*O*-acetyl-pereniporin A (**4**) in  $\text{CD}_3\text{OD}$ .
- S23.**  $^{13}\text{C}$  NMR spectrum (125 MHz) of 3 $\beta$ -hydroxy-6-*O*-acetyl-pereniporin A (**4**) in  $\text{CD}_3\text{OD}$ .
- S24.** HSQC NMR spectrum of 3 $\beta$ -hydroxy-6-*O*-acetyl-pereniporin A (**4**) in  $\text{CD}_3\text{OD}$ .

- S25.** HMBC NMR spectrum of 3 $\beta$ -hydroxy-6-*O*-acetyl-pereniporin A (**4**) in CD<sub>3</sub>OD.
- S26.** COSY NMR spectrum of 3 $\beta$ -hydroxy-6-*O*-acetyl-pereniporin A (**4**) in CD<sub>3</sub>OD.
- S27.** NOESY NMR spectrum of 3 $\beta$ -hydroxy-6-*O*-acetyl-pereniporin A (**4**) in CD<sub>3</sub>OD.
- S28.** HRESIMS spectrum of 3 $\beta$ -hydroxy-6-*O*-acetyl-pereniporin A (**4**).
- S29.** <sup>1</sup>H NMR spectrum (500 MHz) of 13-hydroxypereniporin A (**5**) in CD<sub>3</sub>OD.
- S30.** <sup>13</sup>C NMR spectrum (125 MHz) of 13-hydroxypereniporin A (**5**) in CD<sub>3</sub>OD.
- S31.** HSQC NMR spectrum of 13-hydroxypereniporin A (**5**) in CD<sub>3</sub>OD.
- S32.** HMBC NMR spectrum of 13-hydroxypereniporin A (**5**) in CD<sub>3</sub>OD.
- S33.** COSY NMR spectrum of 13-hydroxypereniporin A (**5**) in CD<sub>3</sub>OD.
- S34.** NOESY NMR spectrum of 13-hydroxypereniporin A (**5**) in CD<sub>3</sub>OD.
- S35.** HRESIMS spectrum of 13-hydroxypereniporin A (**5**).
- S36.** <sup>1</sup>H NMR spectrum (500 MHz) of 6-dehydroxy-6-oxopereniporin A (**6**) in CD<sub>3</sub>OD.
- S37.** <sup>13</sup>C NMR spectrum (125 MHz) of 6-dehydroxy-6-oxopereniporin A (**6**) in CD<sub>3</sub>OD.
- S38.** HSQC NMR spectrum of 6-dehydroxy-6-oxopereniporin A (**6**) in CD<sub>3</sub>OD.
- S39.** HMBC NMR spectrum of 6-dehydroxy-6-oxopereniporin A (**6**) in CD<sub>3</sub>OD.
- S40.** COSY NMR spectrum of 6-dehydroxy-6-oxopereniporin A (**6**) in CD<sub>3</sub>OD.
- S41.** NOESY NMR spectrum of 6-dehydroxy-6-oxopereniporin A (**6**) in CD<sub>3</sub>OD.
- S42.** HRESIMS spectrum of 6-dehydroxy-6-oxopereniporin A (**6**).
- S43.** <sup>1</sup>H NMR spectrum (500 MHz) of pereniporin C (**7**) in CDCl<sub>3</sub>.
- S44.** <sup>13</sup>C NMR spectrum (125 MHz) of pereniporin C (**7**) in CDCl<sub>3</sub>.
- S45.** HSQC NMR spectrum of pereniporin C (**7**) in CDCl<sub>3</sub>.
- S46.** HMBC NMR spectrum of pereniporin C (**7**) in CDCl<sub>3</sub>.
- S47.** COSY NMR spectrum of pereniporin C (**7**) in CDCl<sub>3</sub>.
- S48.** NOESY NMR spectrum of pereniporin C (**7**) in CDCl<sub>3</sub>.
- S49.** HRESIMS spectrum of pereniporin C (**7**).

**S50.** NOESY correlations of compounds **2**, **4**, and **5**.

**S51.** Experimental and calculated ECD spectra of compounds **2**, **4**, and **5**.

**S52.**  $^1\text{H}$  NMR spectroscopic data of known compounds.

**S53.** Structures of known compounds.



S1.  $^1\text{H}$  NMR spectrum (500 MHz) of 6-*epi*-pereniporin A (**1**) in  $\text{CD}_3\text{OD}$ .

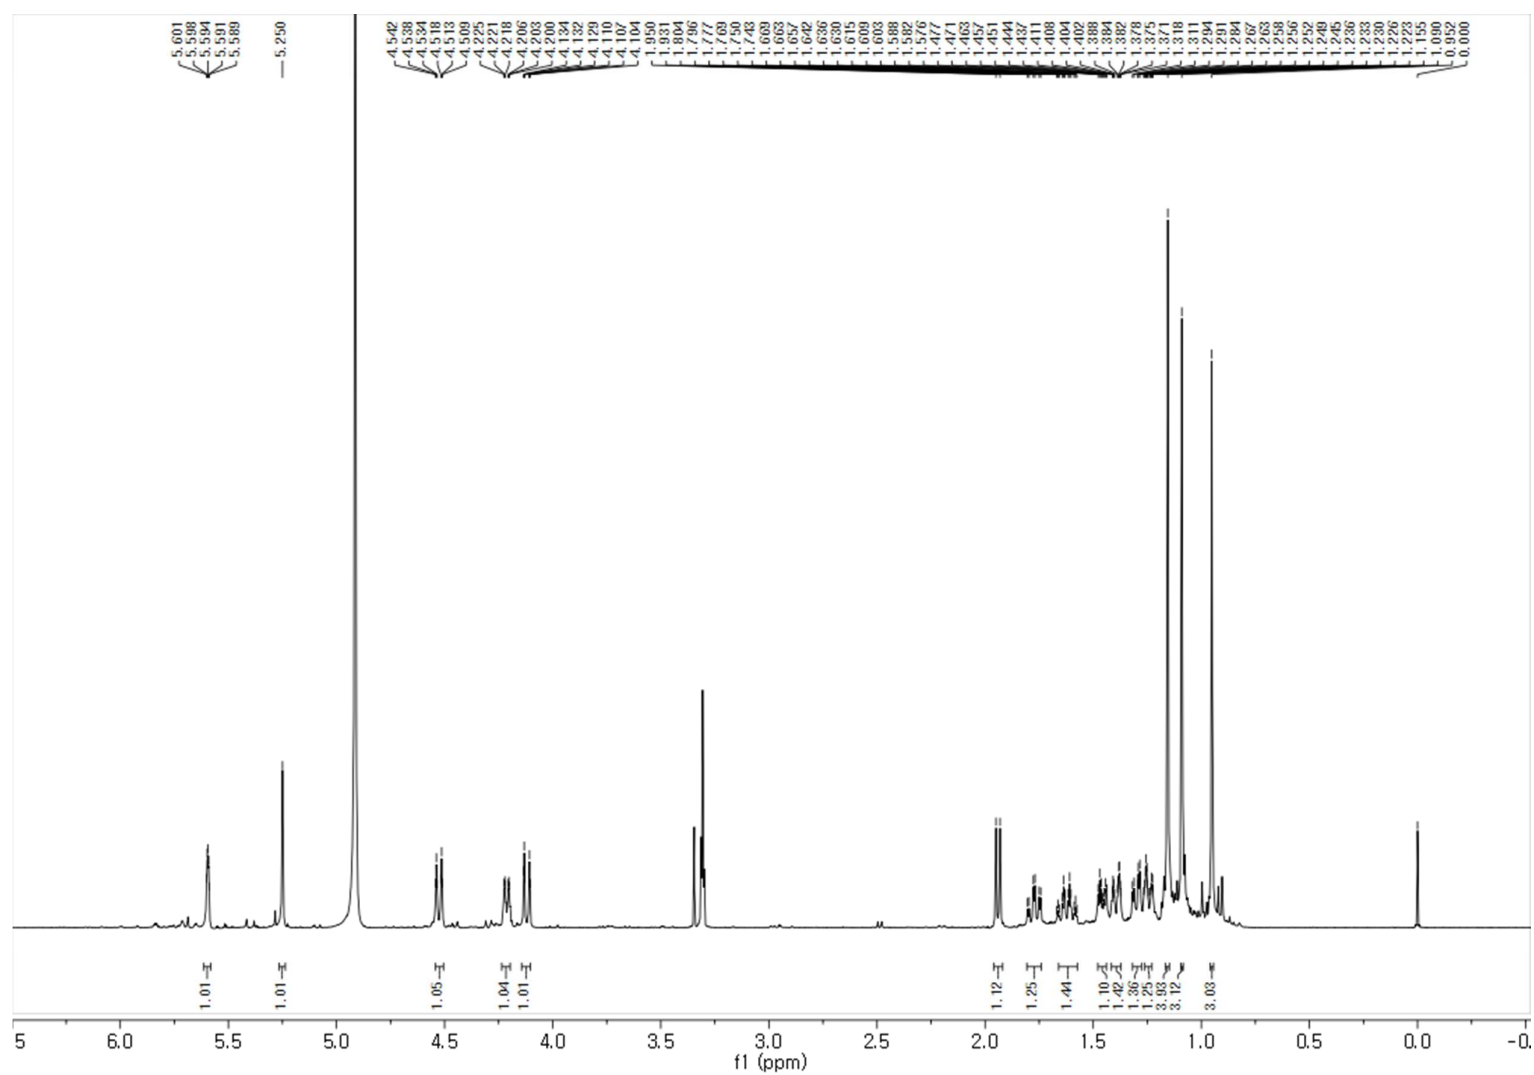

S2.  $^{13}\text{C}$  NMR spectrum (125 MHz) of 6-*epi*-pereniporin A (**1**) in  $\text{CD}_3\text{OD}$ .

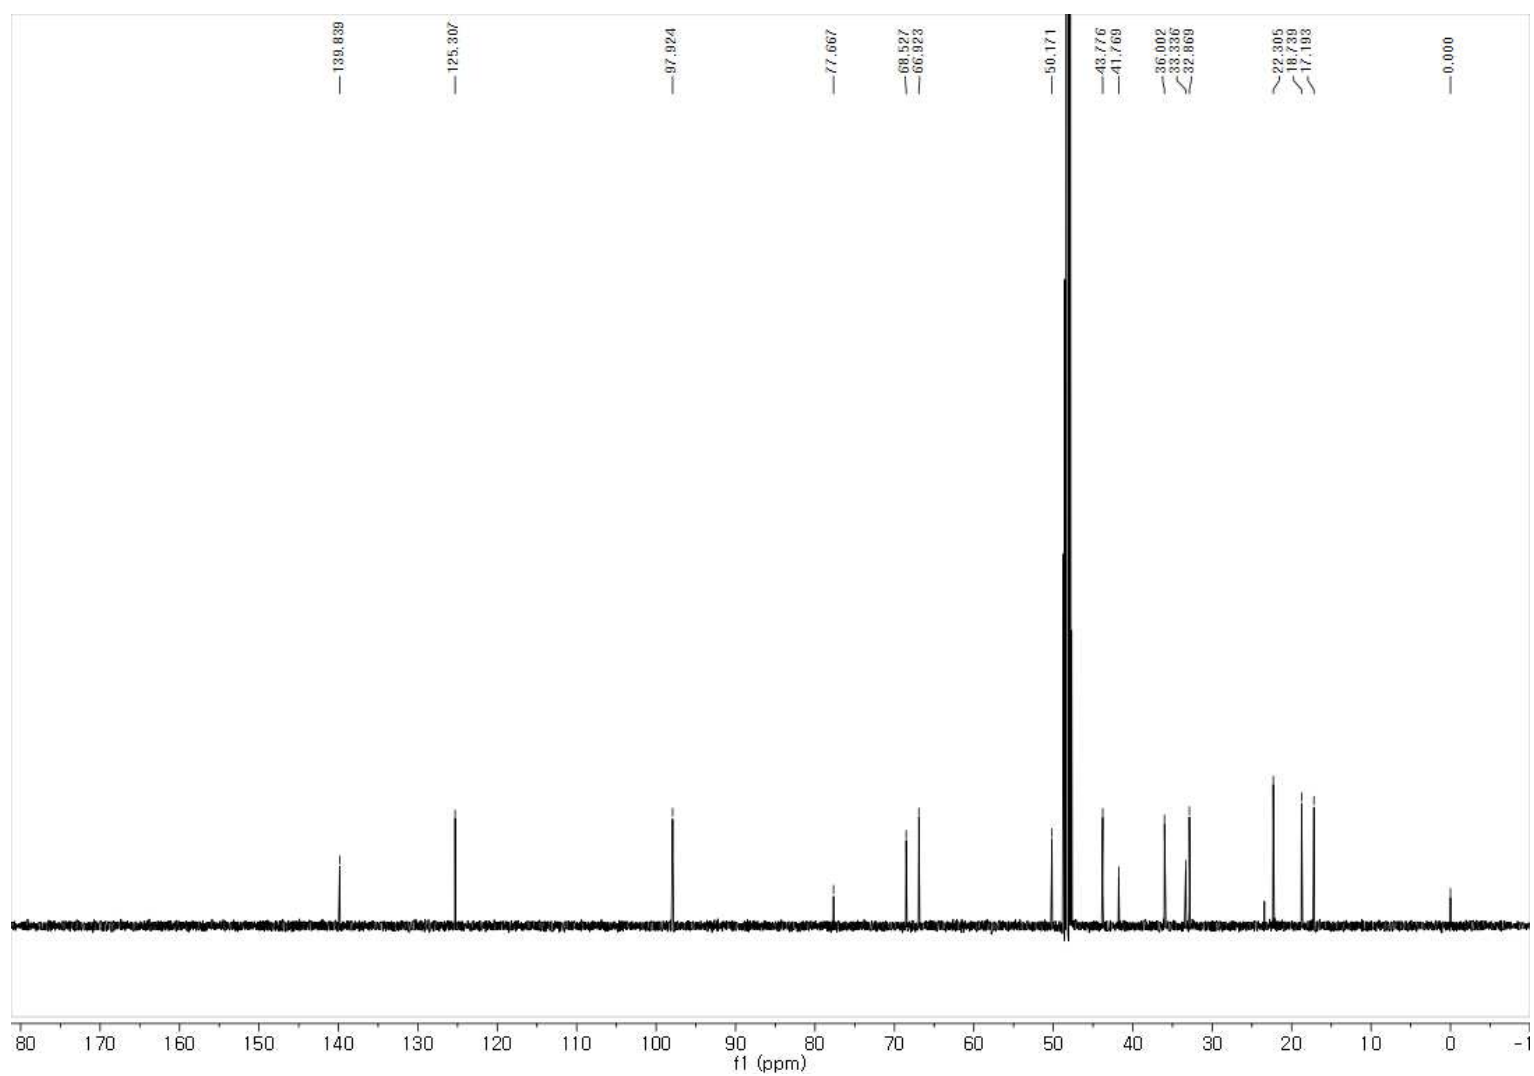

S3. HSQC NMR spectrum of 6-*epi*-pereniporin A (**1**) in CD<sub>3</sub>OD.

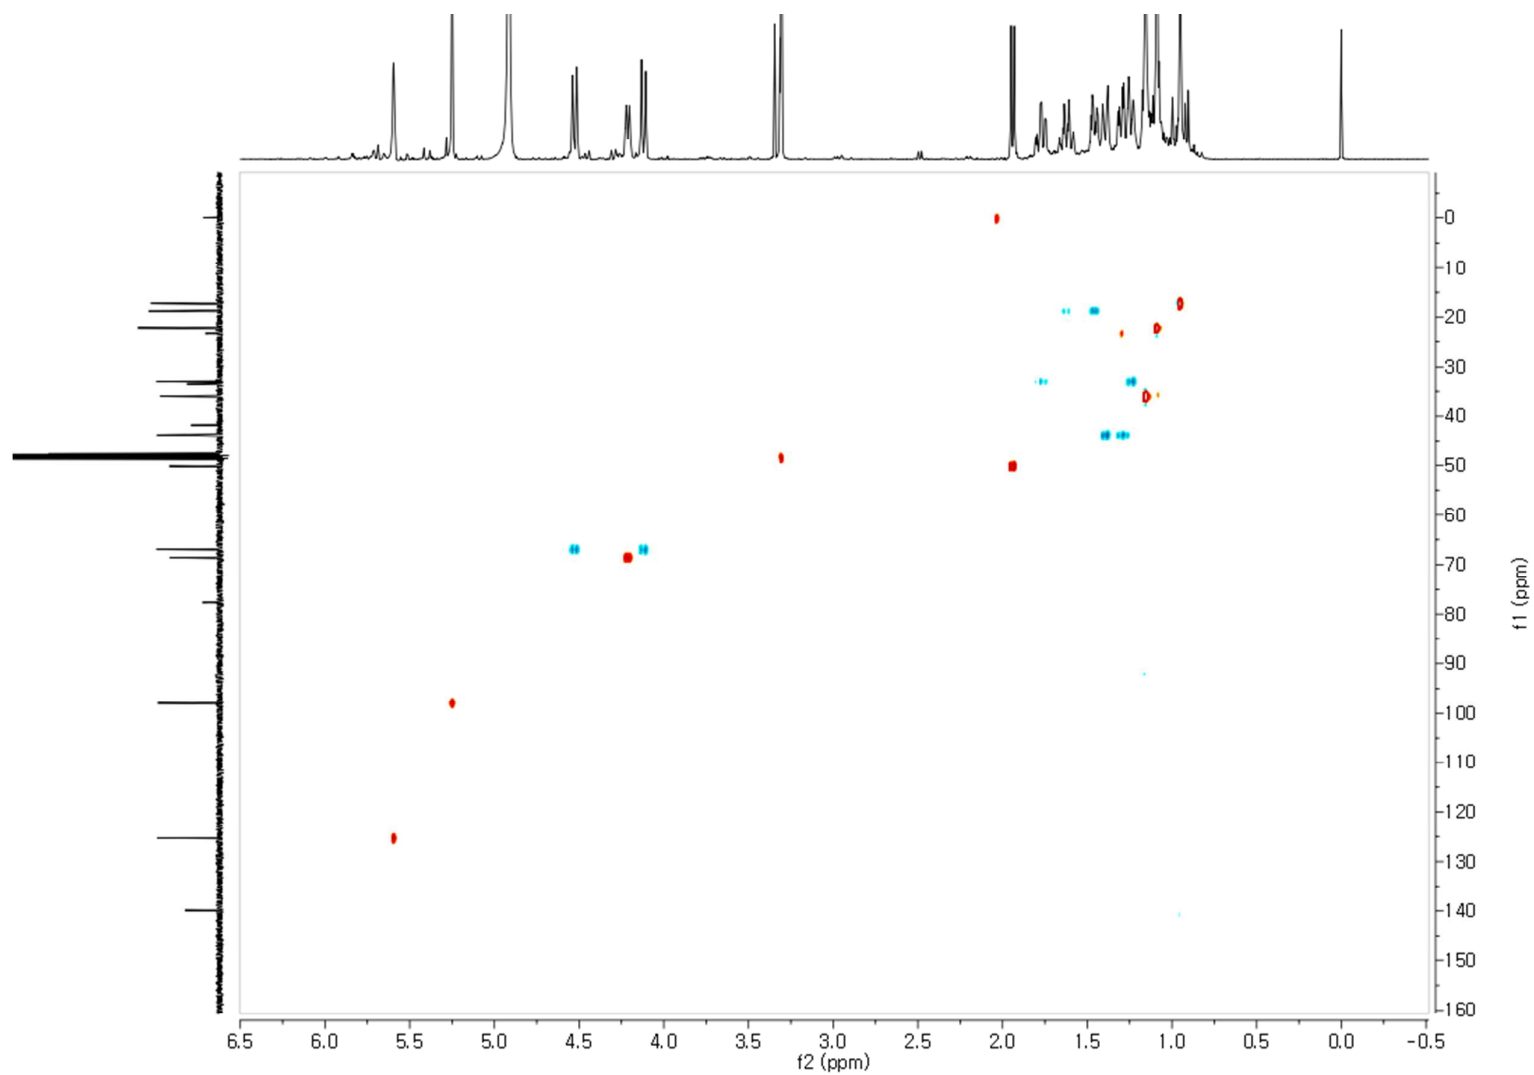

S4. HMBC NMR spectrum of 6-*epi*-pereniporin A (**1**) in CD<sub>3</sub>OD.

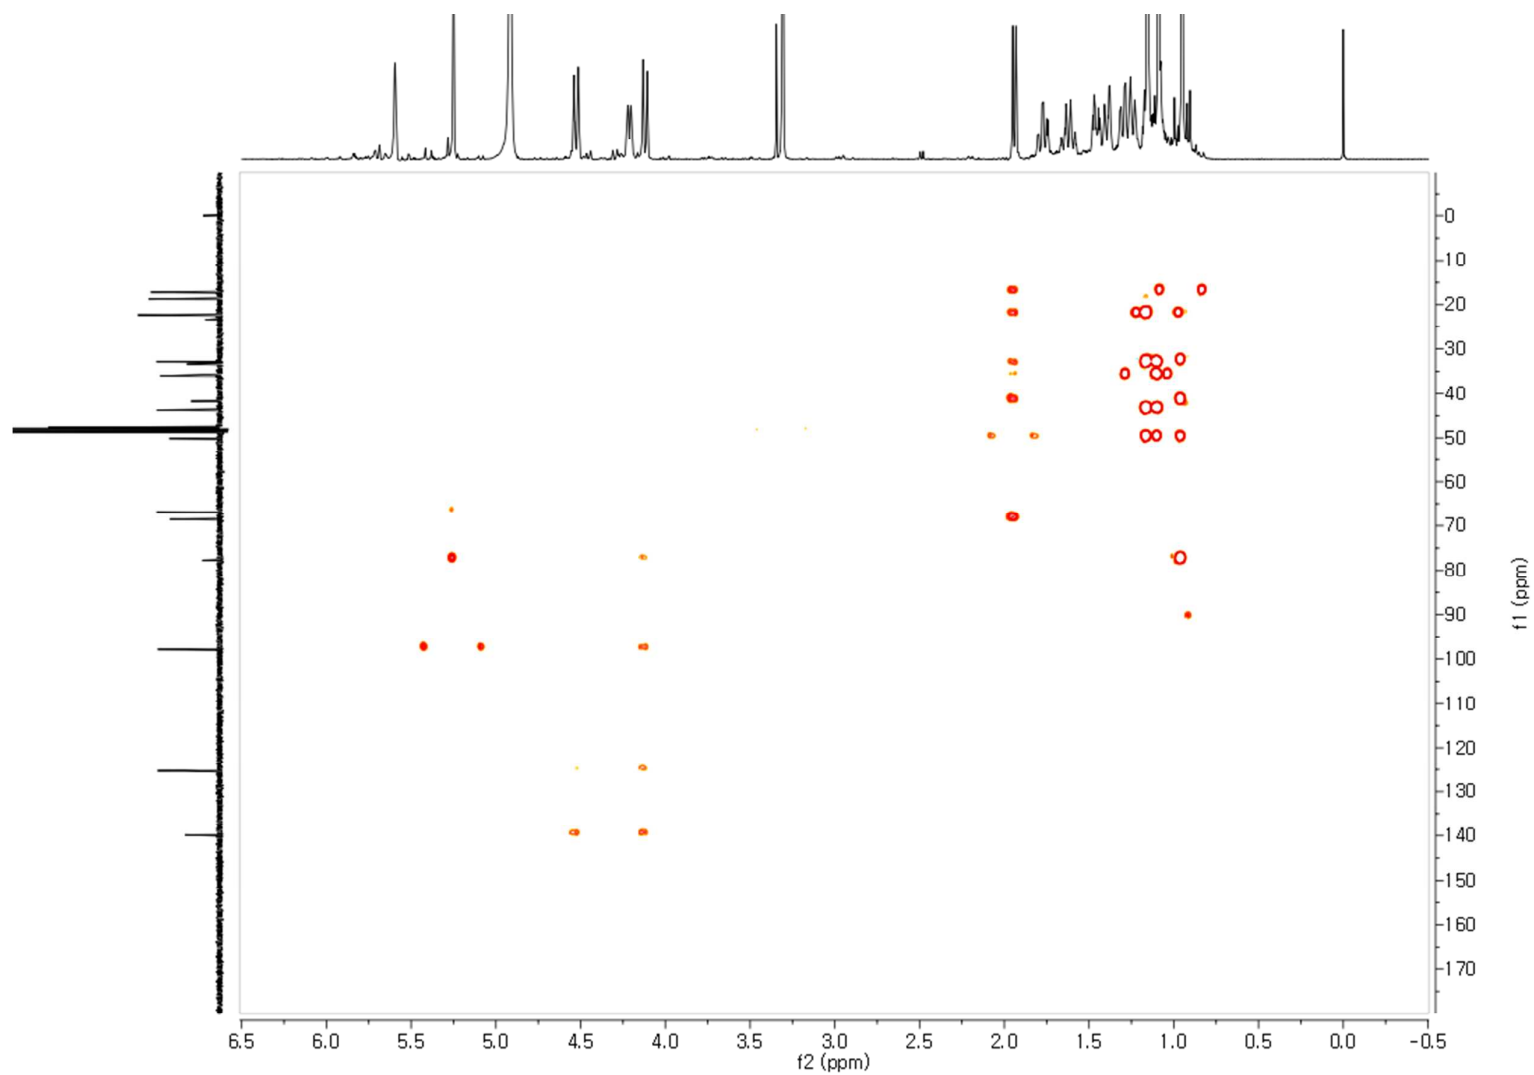

**S5.** COSY NMR spectrum of 6-*epi*-pereniporin A (**1**) in CD<sub>3</sub>OD.

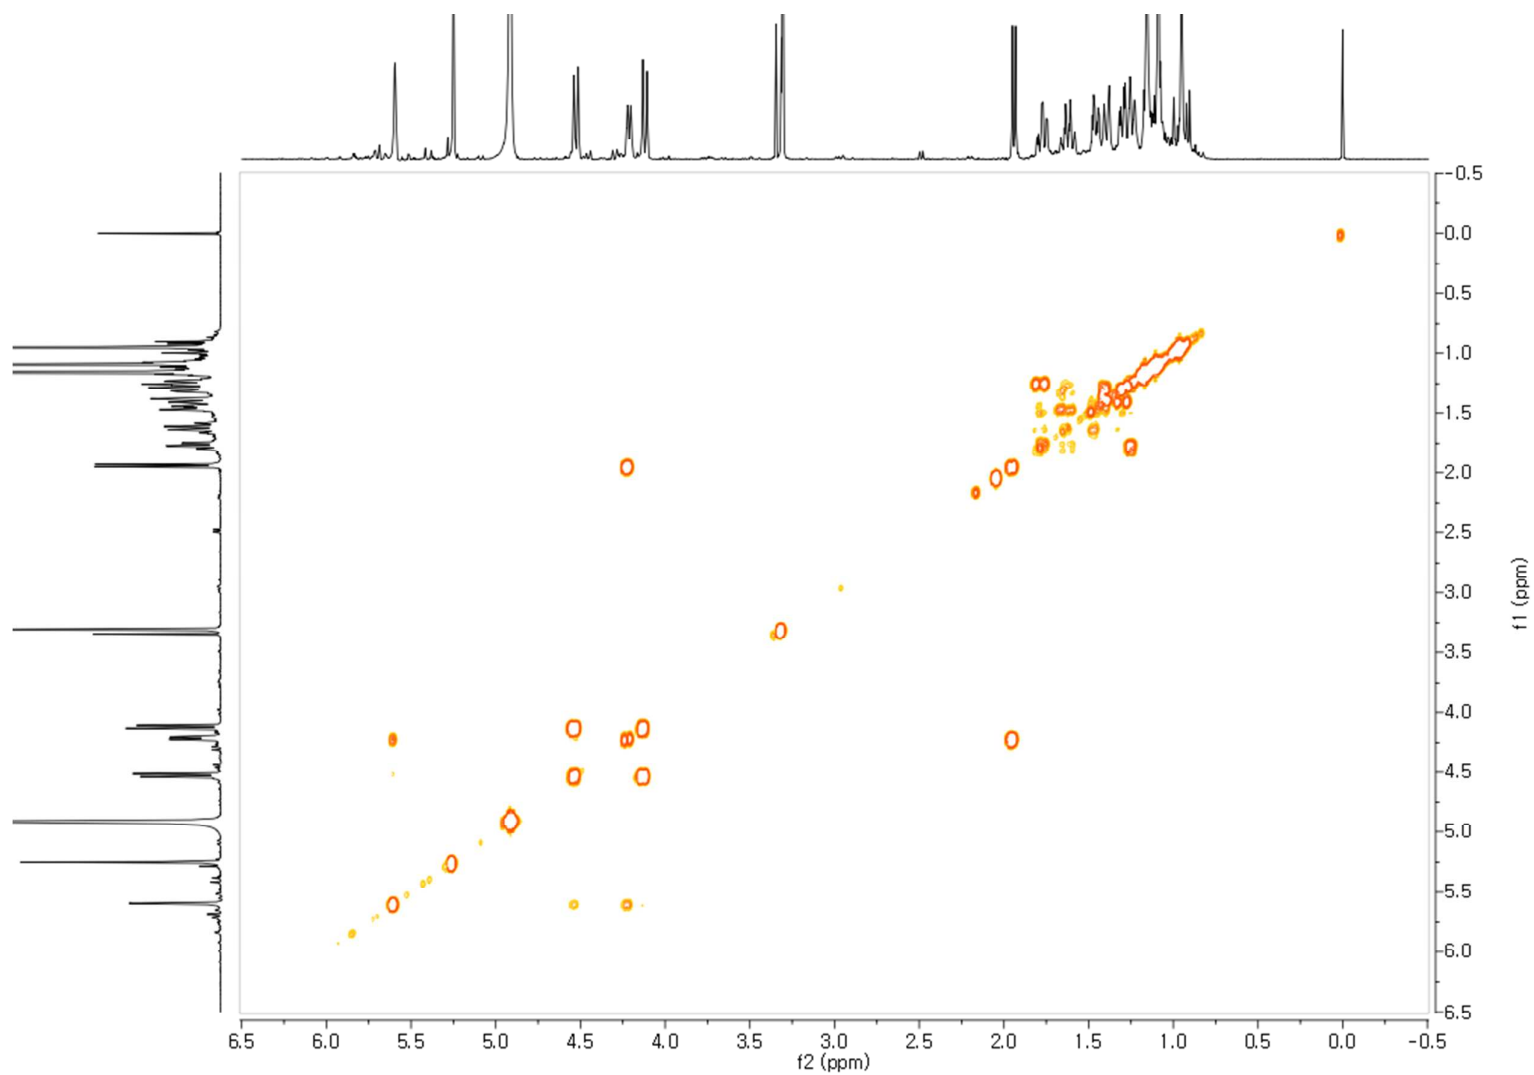

S6. NOESY NMR spectrum of 6-*epi*-pereniporin A (**1**) in CD<sub>3</sub>OD.

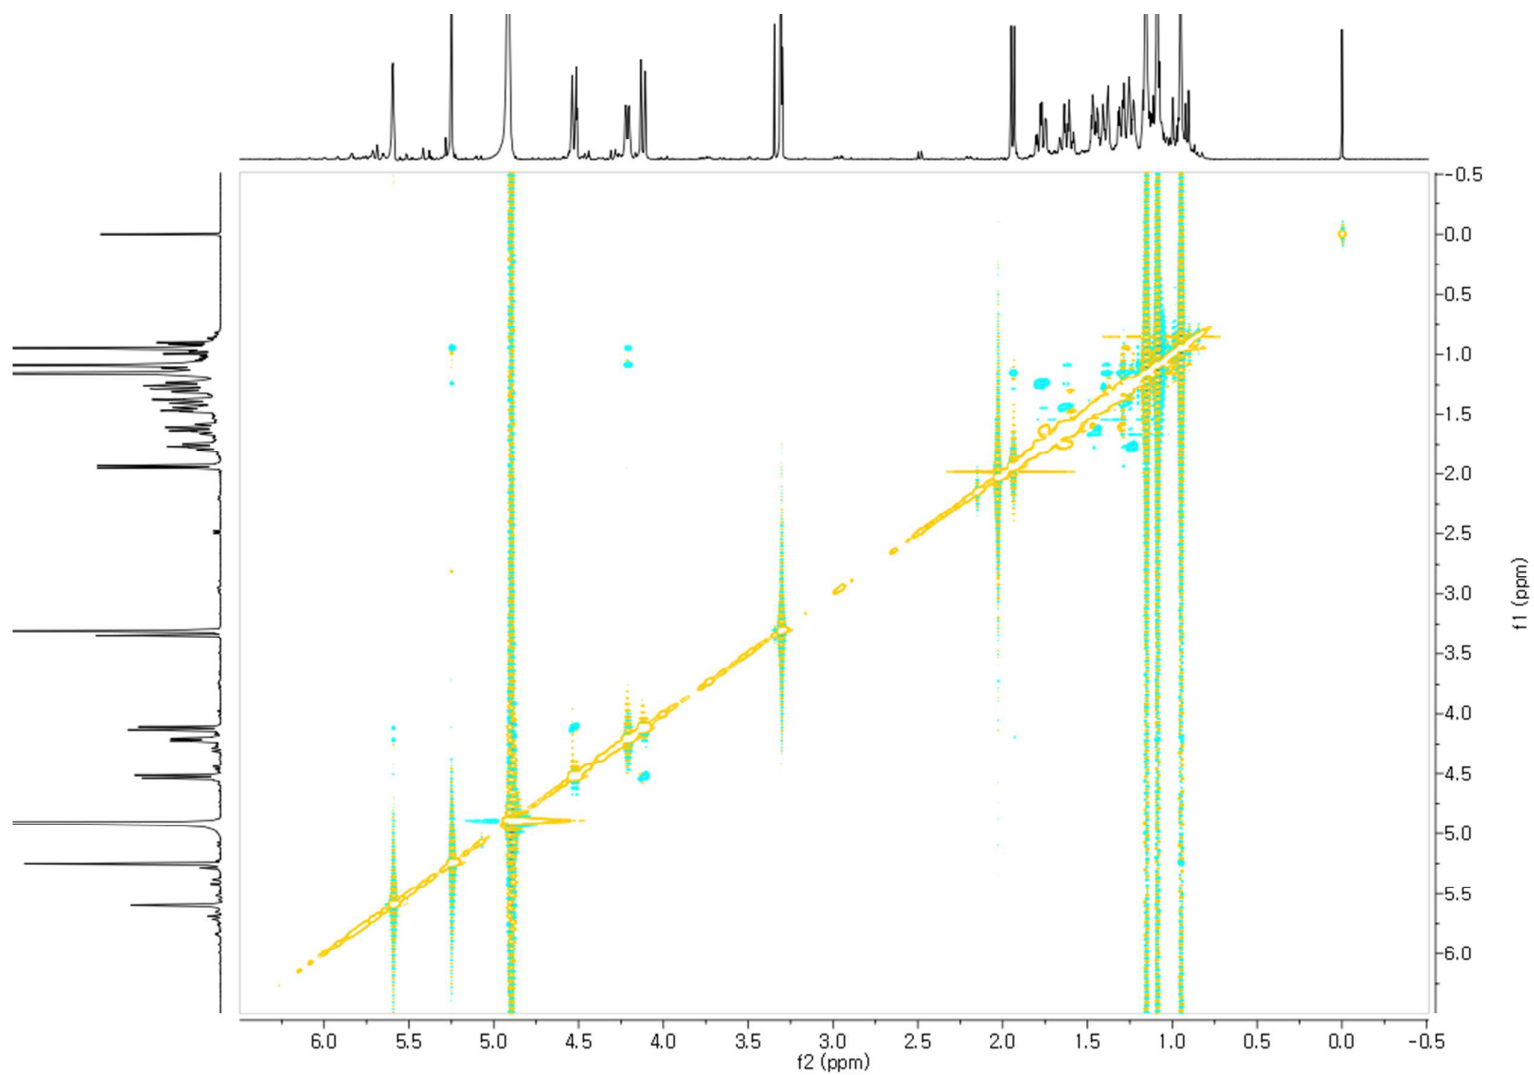

S7. HRESIMS spectrum of 6-*epi*-pereniporin A (**1**).

Tolerance = 5.0 PPM / DBE: min = -1.5, max = 50.0

Selected filters: None

Monoisotopic Mass, Even Electron Ions

166 formula[e] evaluated with 1 results within limits (up to 50 best isotopic matches for each mass)

| Mass     | Calc. Mass | mDa  | PPM  | DBE | Formula                                        | H-FIT     | C  | H  | N | O |
|----------|------------|------|------|-----|------------------------------------------------|-----------|----|----|---|---|
| 267.1583 | 267.1596   | -1.3 | -1.9 | 4.5 | C <sub>15</sub> H <sub>23</sub> O <sub>4</sub> | 5546136.0 | 15 | 23 | 4 |   |

JY2-153-2(-) 164 (2.046)

1: TOF MS ES-

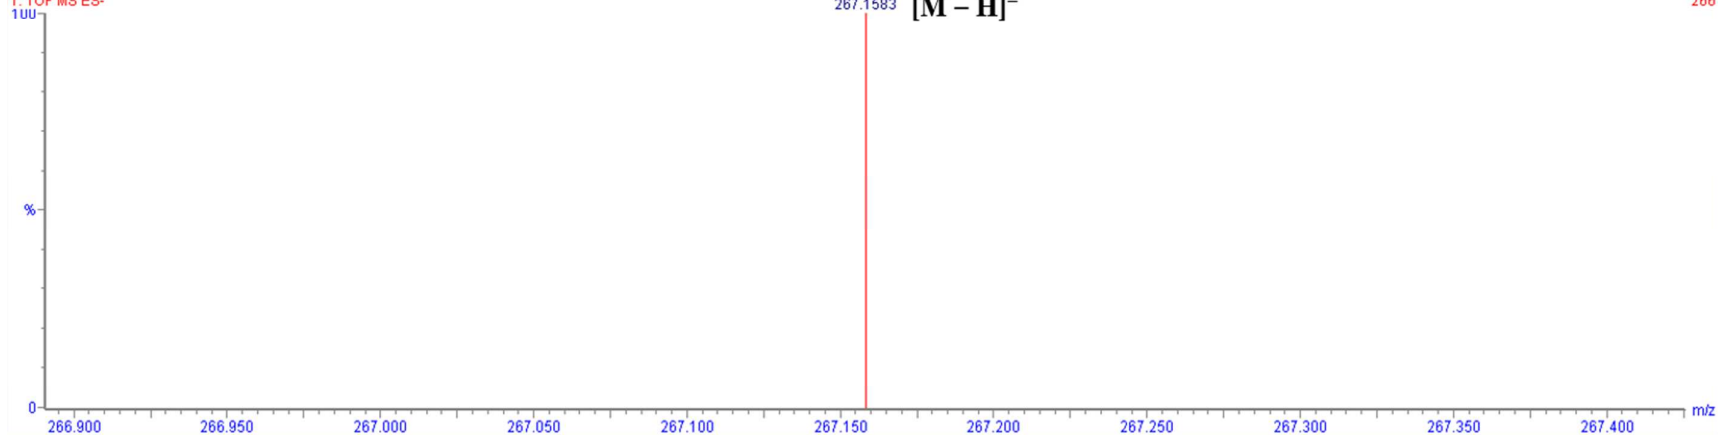

**S8.**  $^1\text{H}$  NMR spectrum (500 MHz) of 6-*epi*-*O*-methyl-pereniporin A (**2**) in  $\text{CD}_3\text{OD}$ .

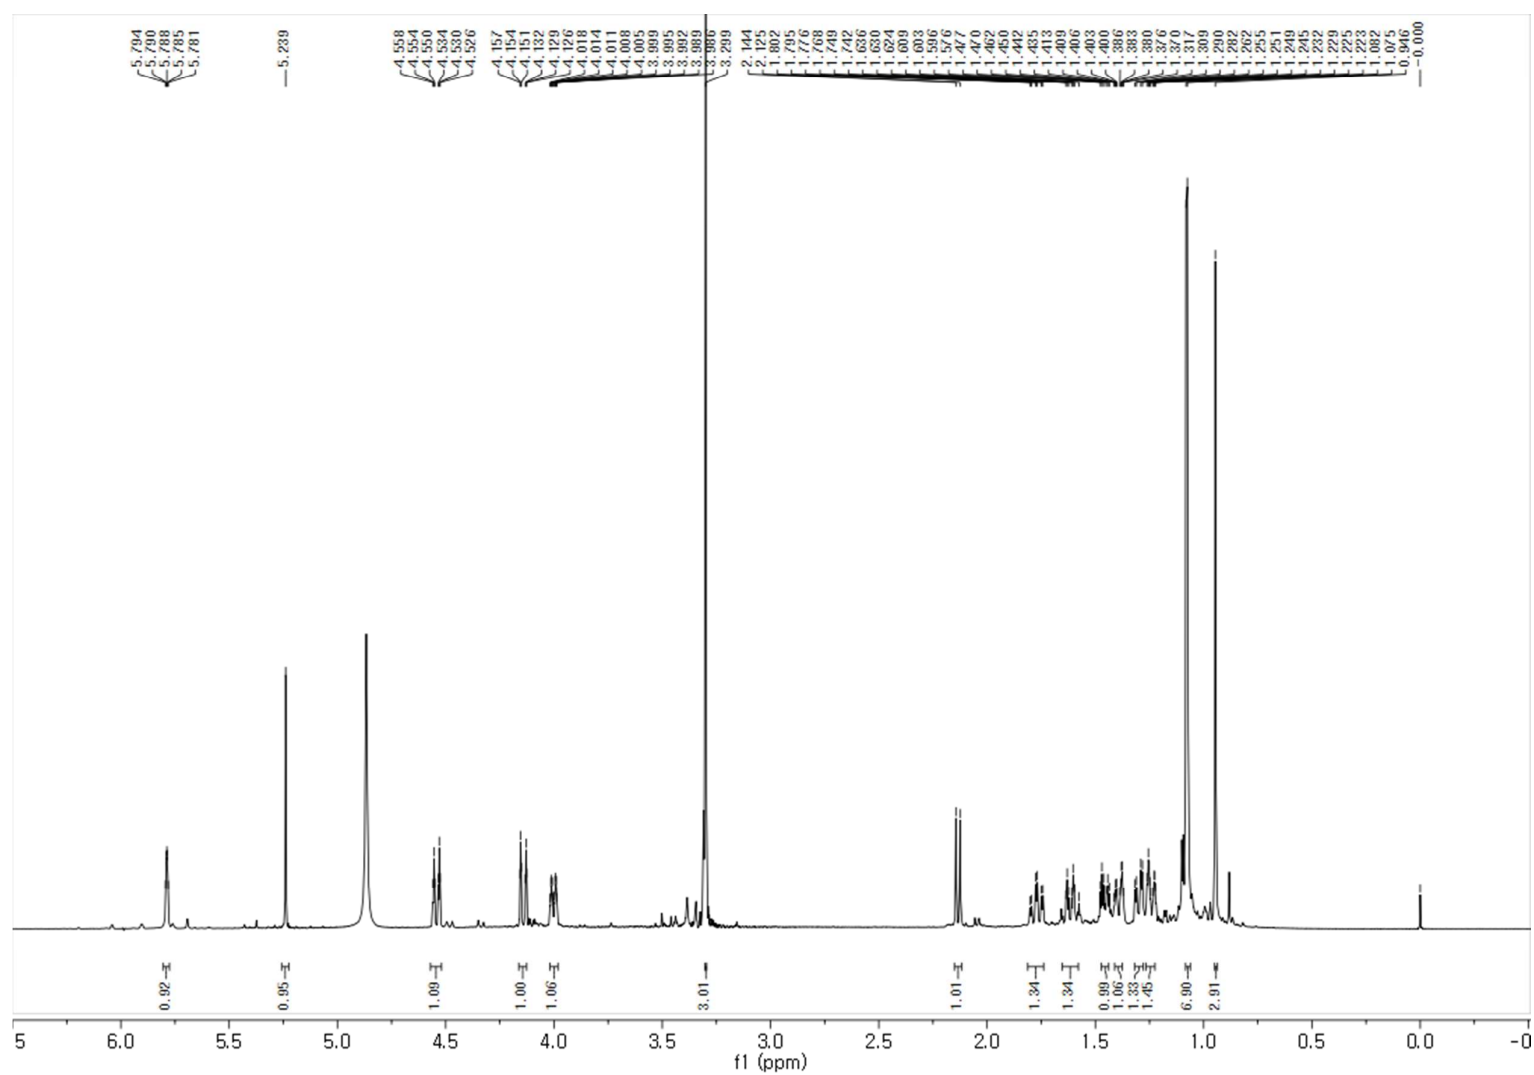



S9.  $^{13}\text{C}$  NMR spectrum (125 MHz) of 6-*epi*-*O*-methyl-pereniporin A (**2**) in  $\text{CD}_3\text{OD}$ .

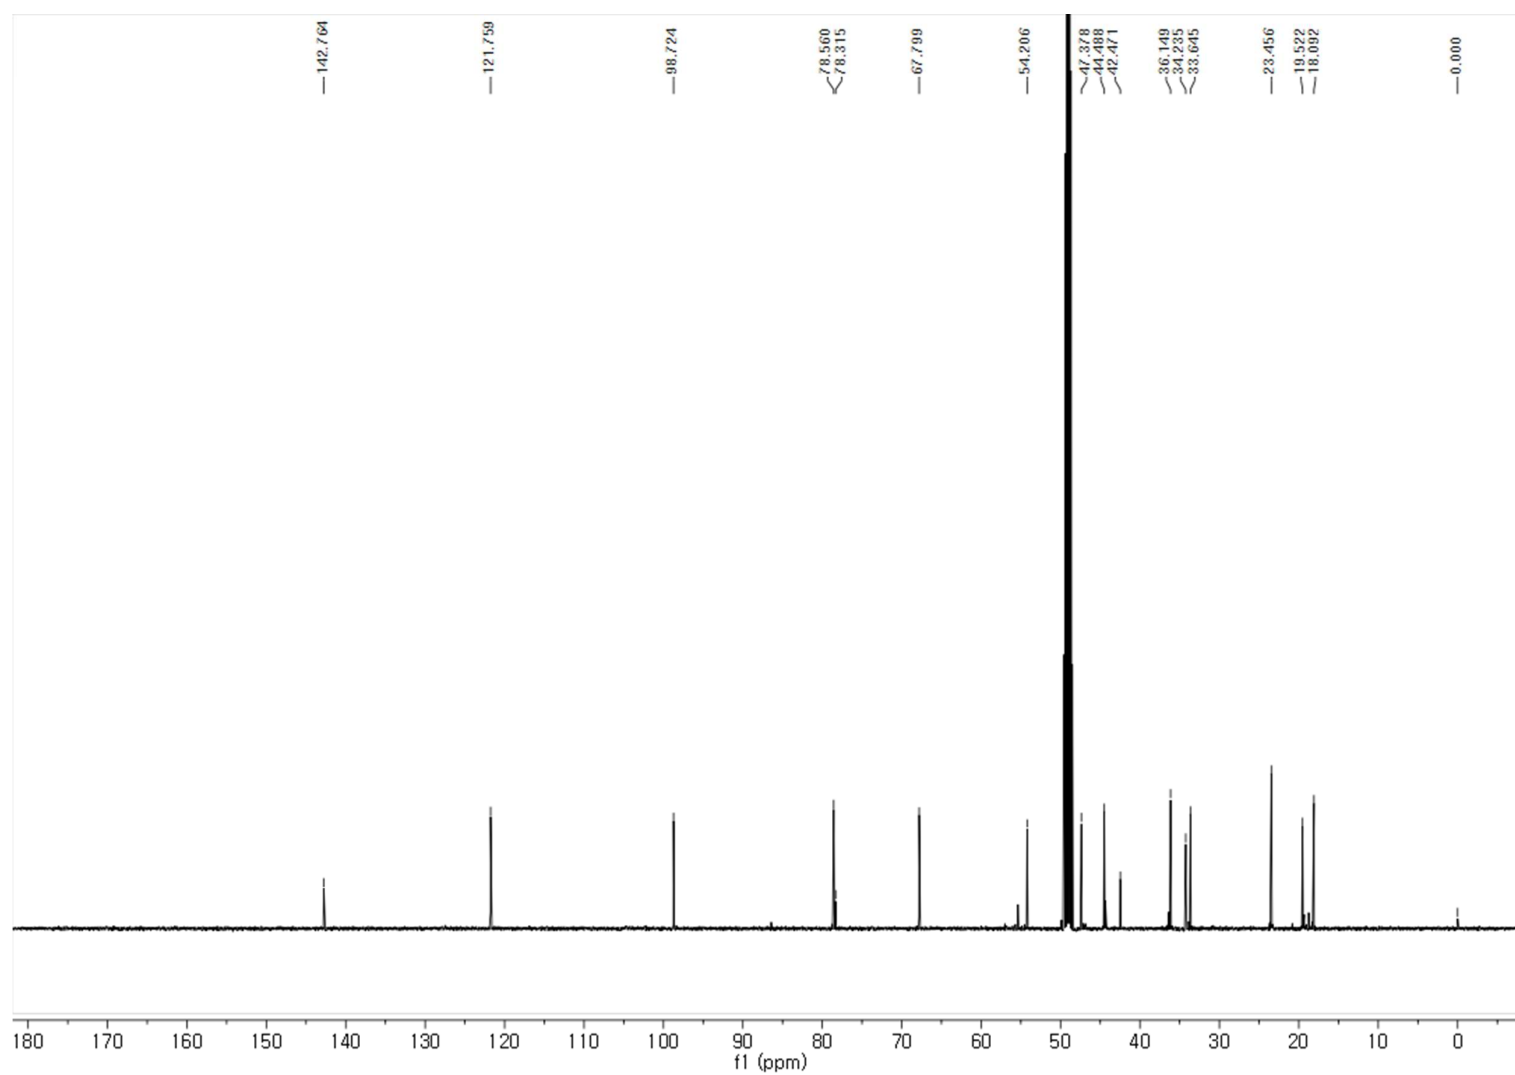

**S10.** HSQC NMR spectrum of 6-*epi*-*O*-methyl-pereniporin A (**2**) in CD<sub>3</sub>OD.

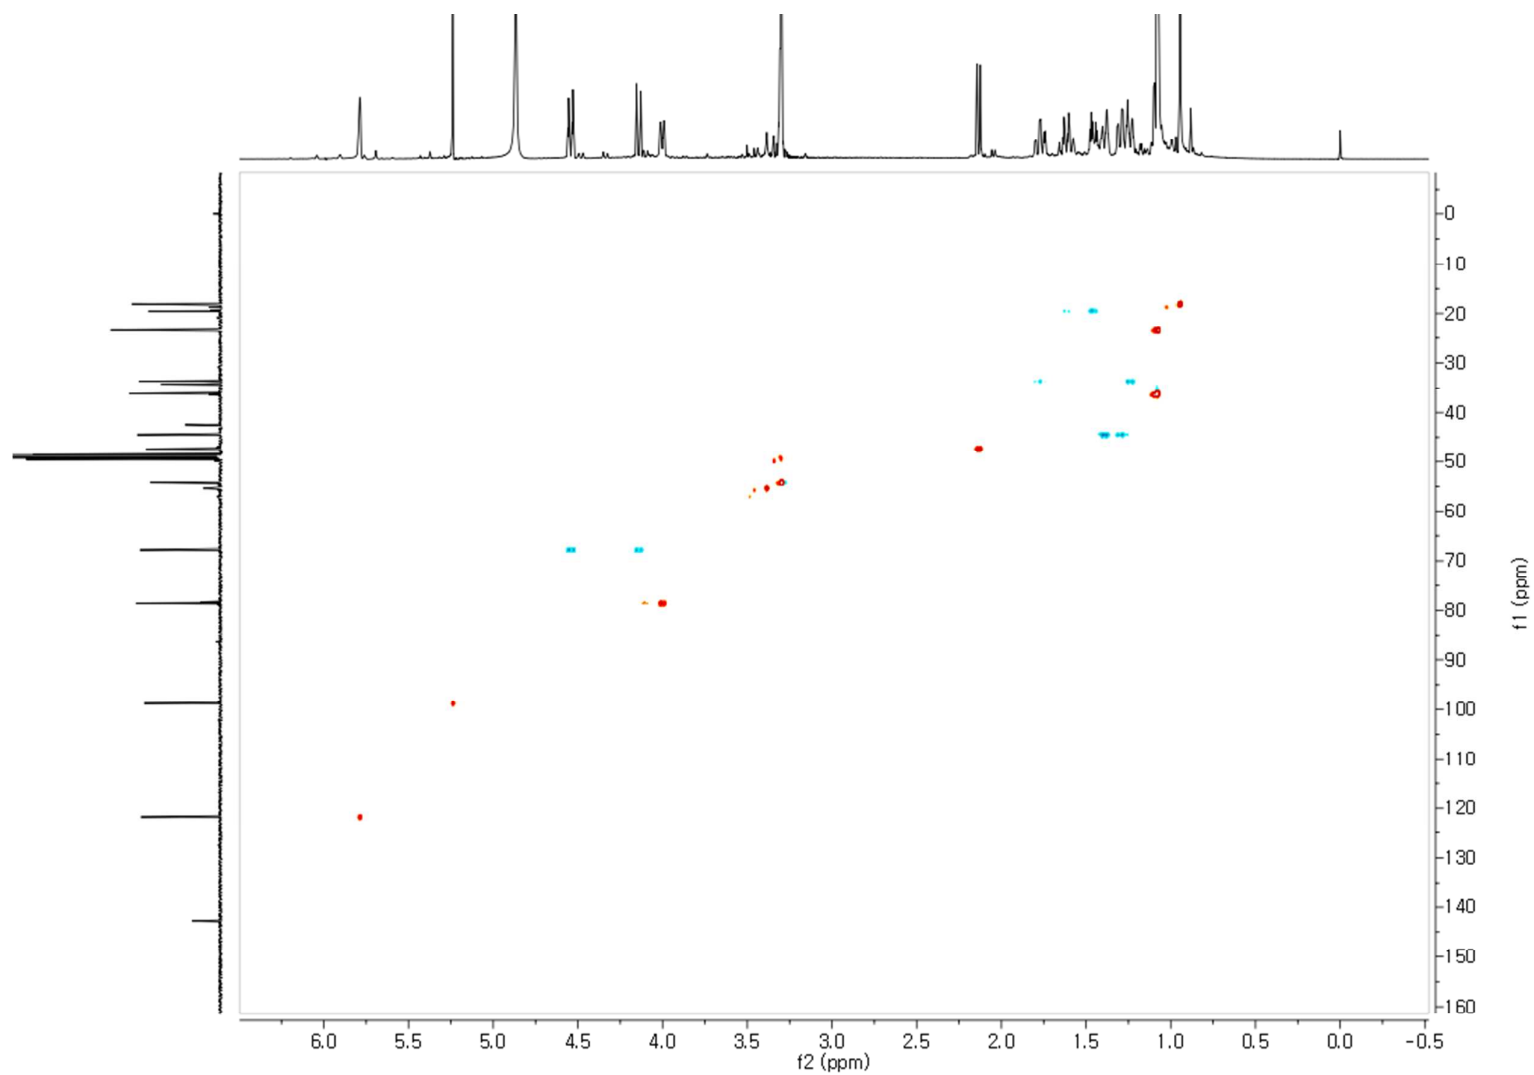

**S11.** HMBC NMR spectrum of 6-*epi*-*O*-methyl-pereniporin A (**2**) in CD<sub>3</sub>OD.

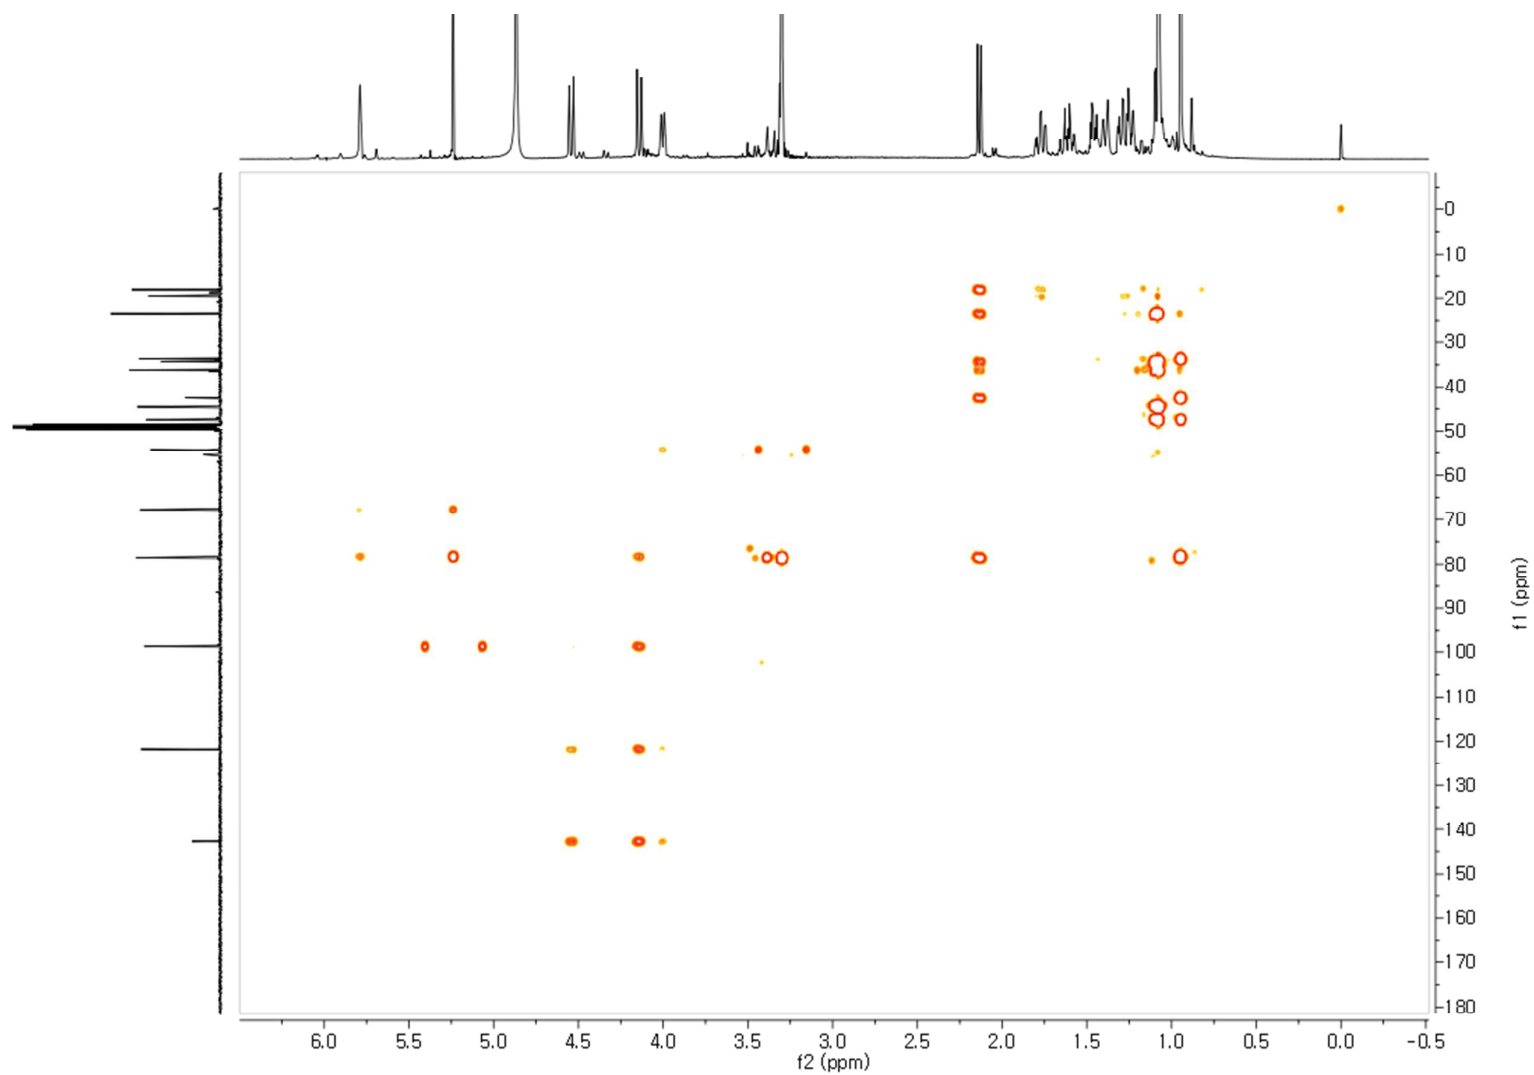

**S12.** COSY NMR spectrum of 6-*epi*-*O*-methyl-pereniporin A (**2**) in CD<sub>3</sub>OD.

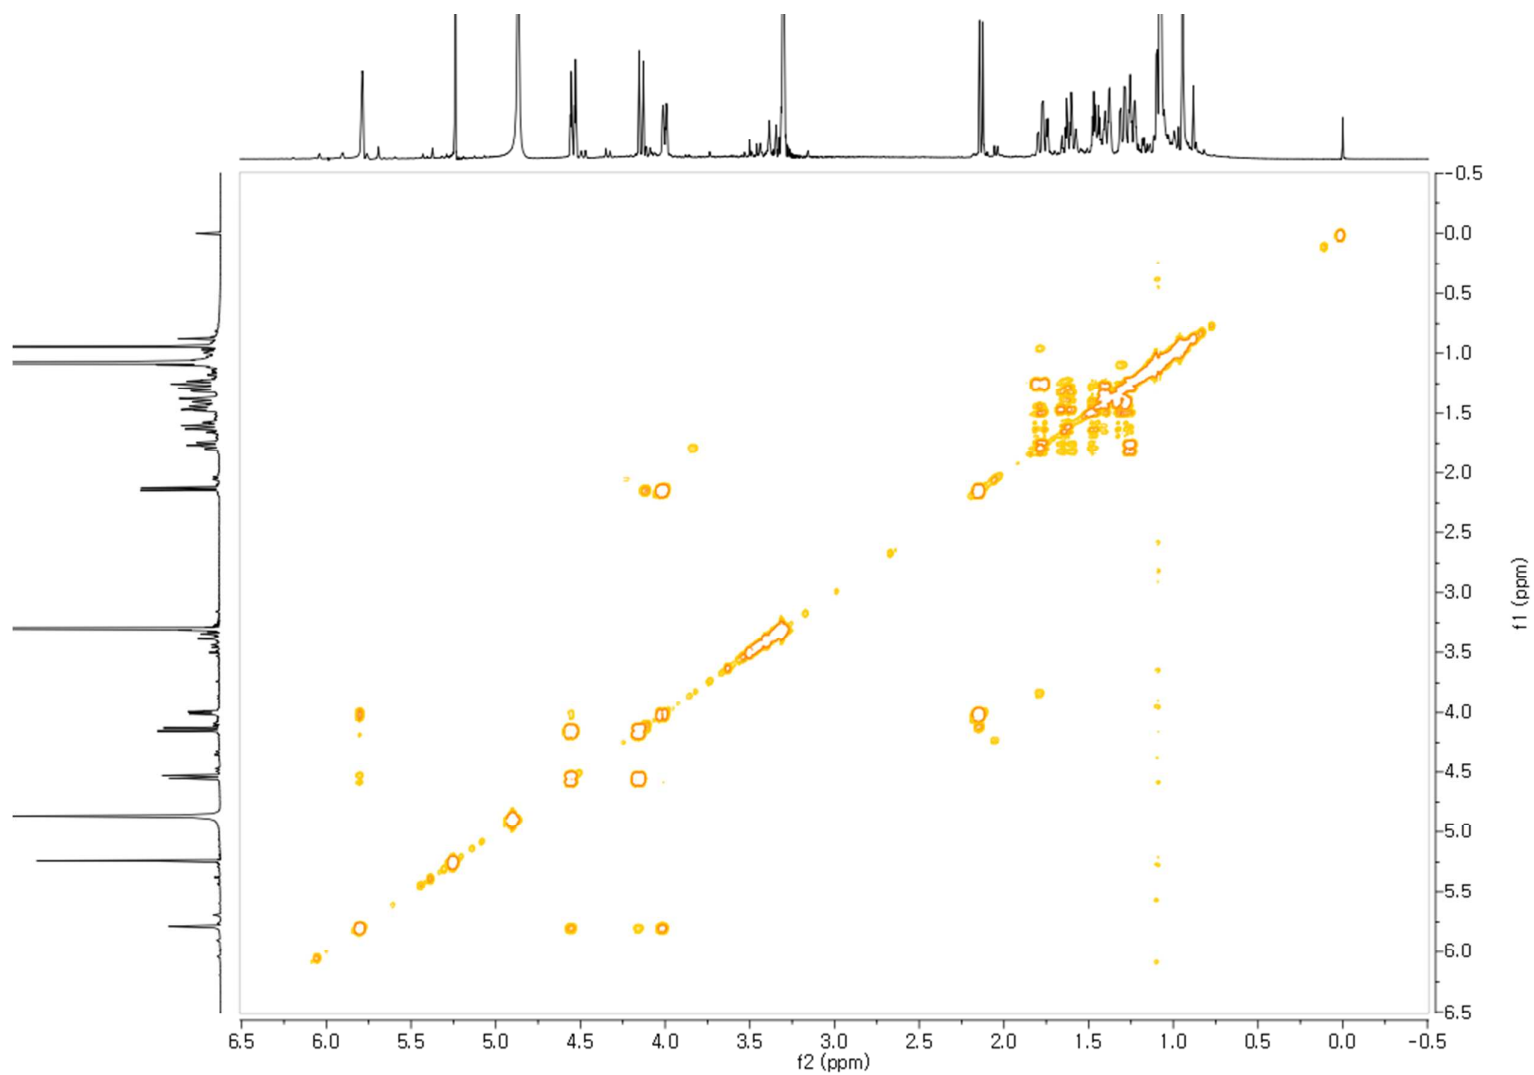

**S13.** NOESY NMR spectrum of 6-*epi*-*O*-methyl-pereniporin A (**2**) in CD<sub>3</sub>OD.

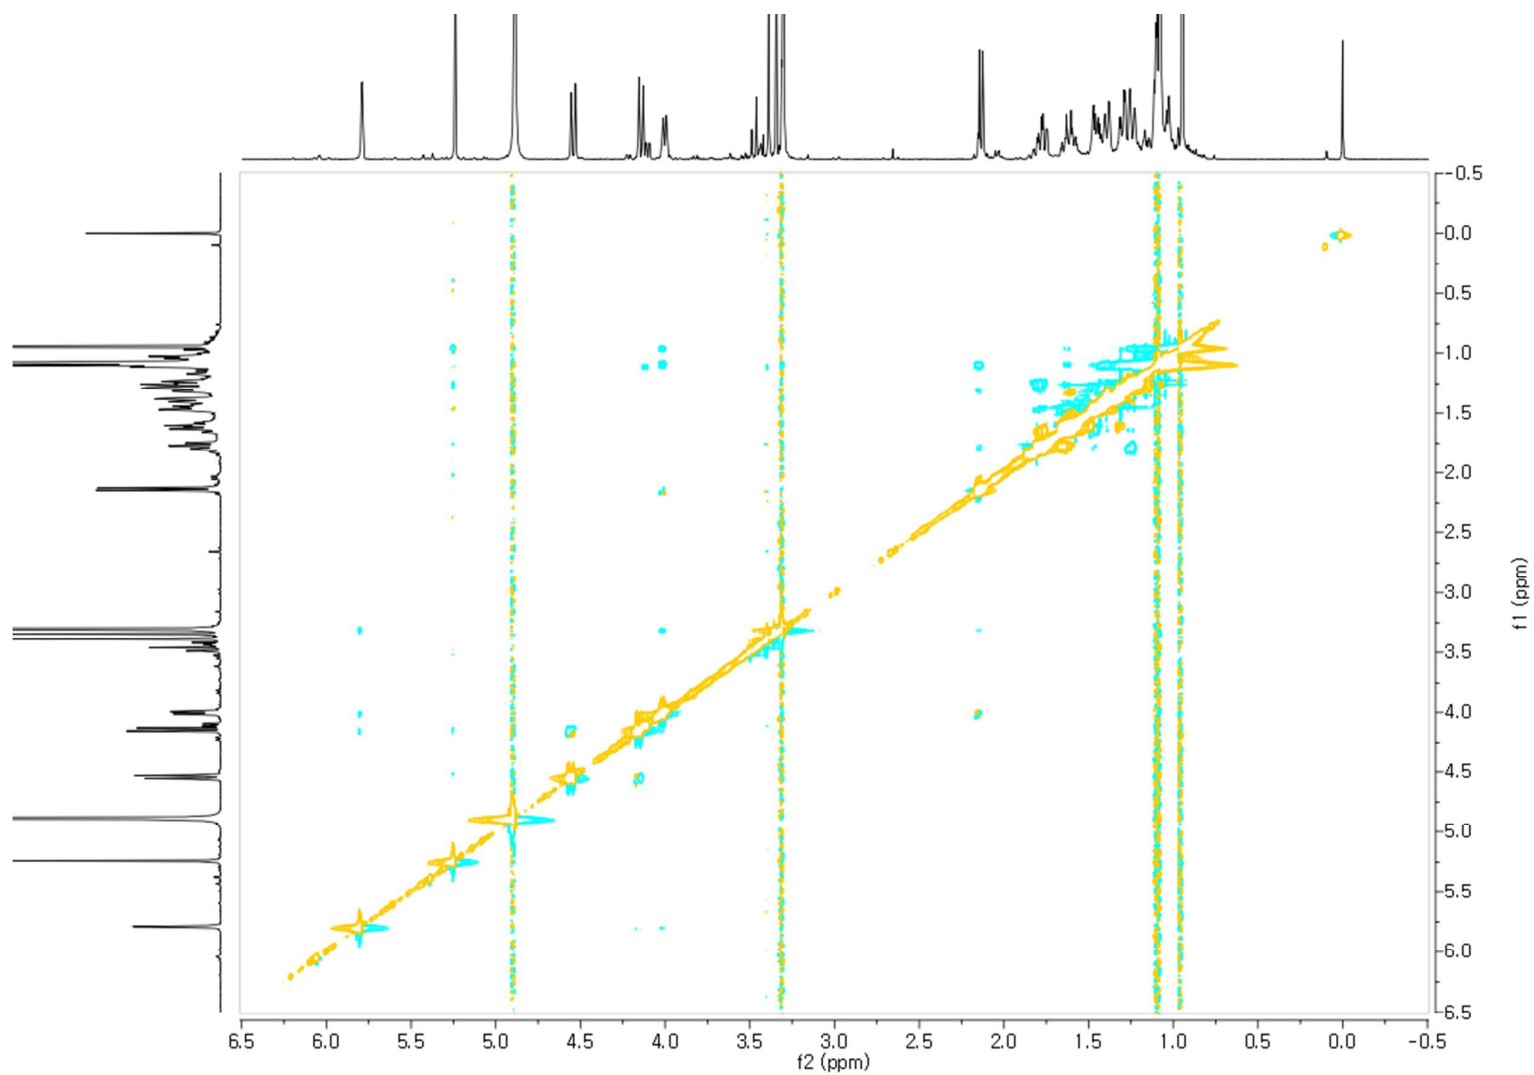

**S14.** HRESIMS spectrum of 6-*epi*-*O*-methyl-pereniporin A (2).

Tolerance = 10.0 PPM / DBE: min = -1.5, max = 50.0

Selected filters: None

**Monoisotopic Mass, Even Electron Ions**

**181 formula[e] evaluated with 1 results within limits (up to 50 best isotopic matches for each mass)**

| Mass     | Calc. Mass | mDa | PPM | DBE | Formula                                        | H-FIT     | C  | H  | N | O |
|----------|------------|-----|-----|-----|------------------------------------------------|-----------|----|----|---|---|
| 281.1760 | 281.1753   | 0.7 | 2.5 | 4.5 | C <sub>16</sub> H <sub>25</sub> O <sub>4</sub> | 5546396.5 | 16 | 25 | 4 |   |

JY2-153-7(-) 215 (2.677) Cm (212:217)

1: TOF MS ES-

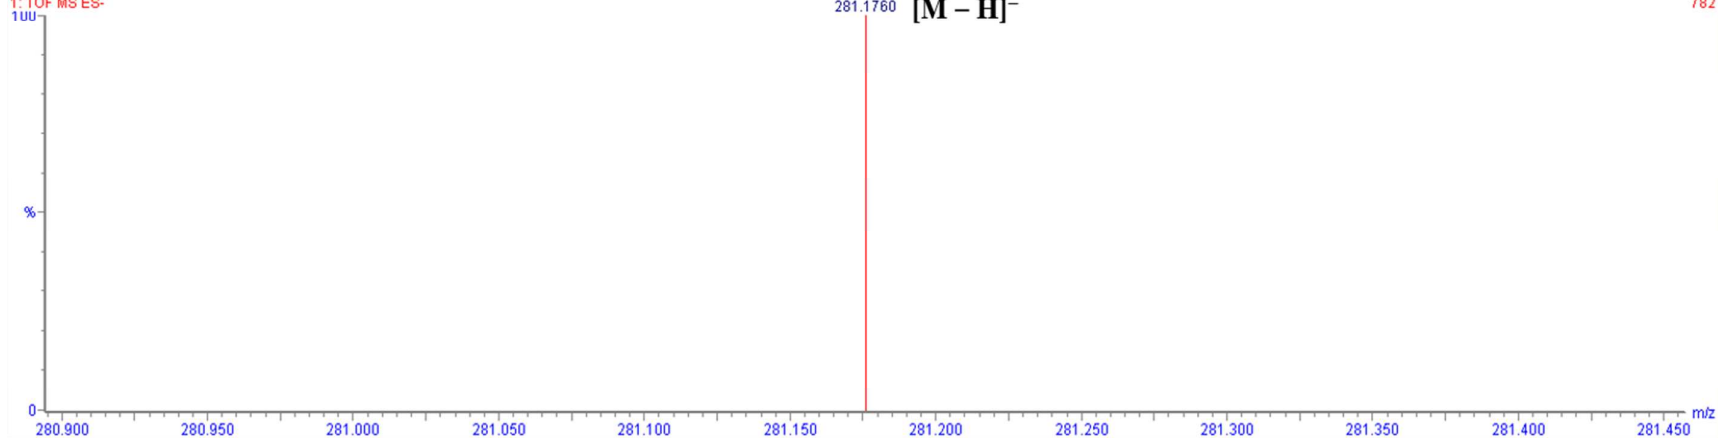

**S15.**  $^1\text{H}$  NMR spectrum (500 MHz) of 6-*O*-methyl-pereniporin A (**3**) in  $\text{CD}_3\text{OD}$ .

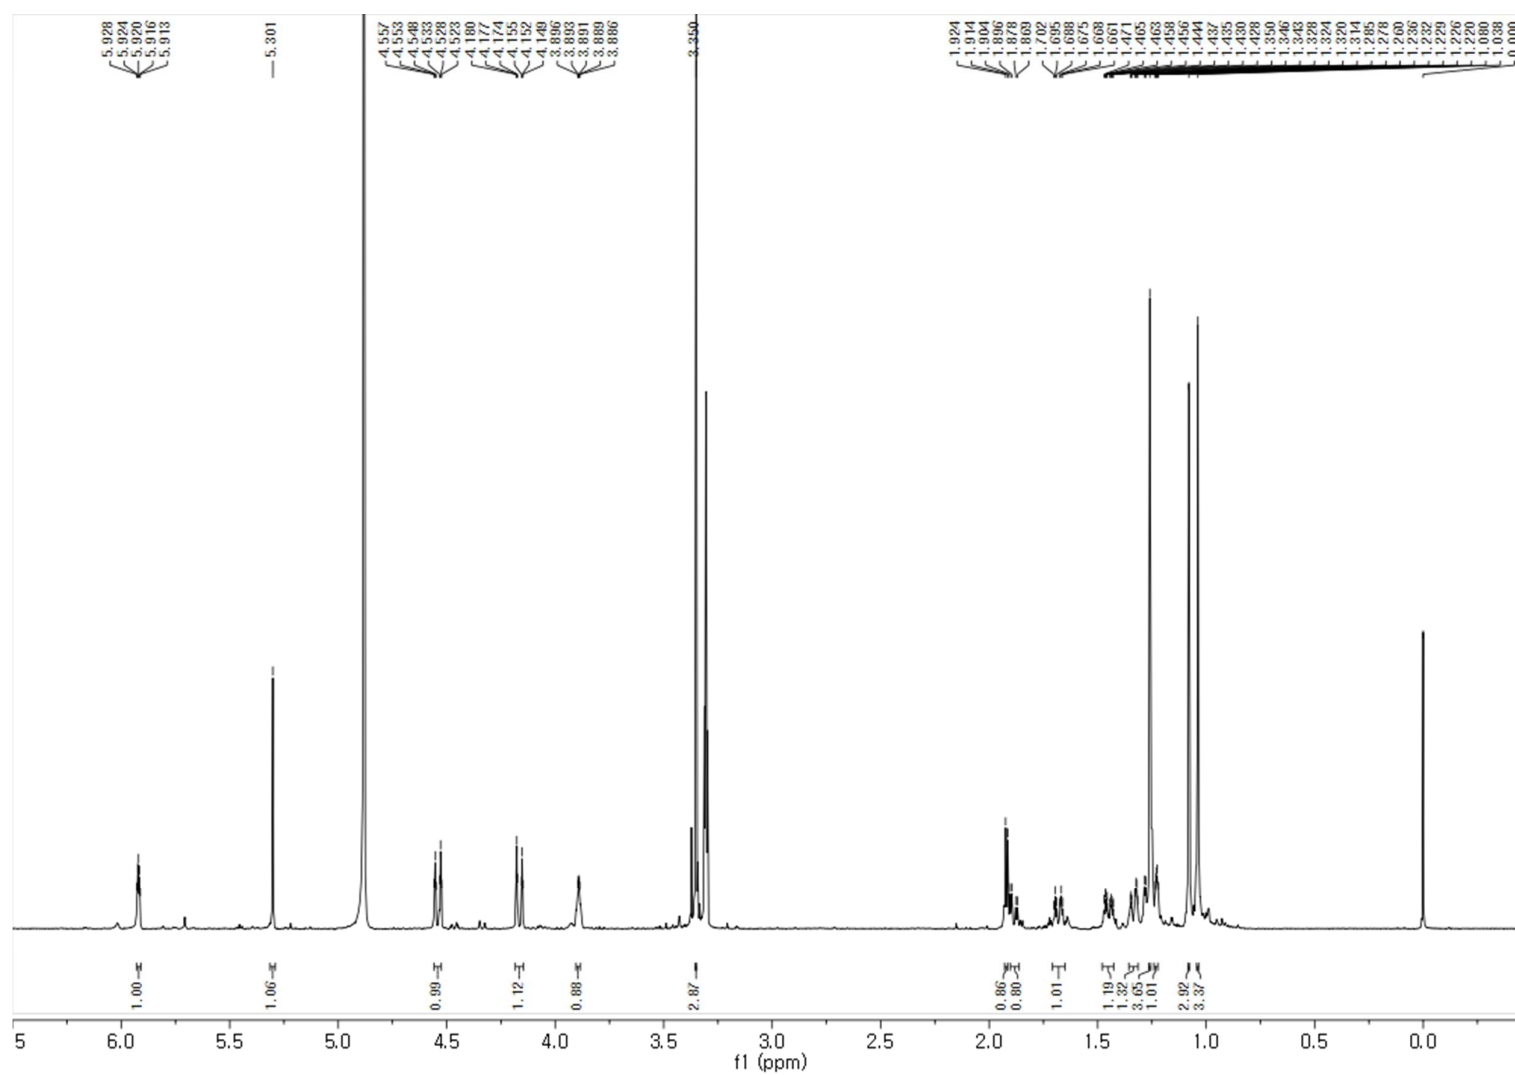

**S16.**  $^{13}\text{C}$  NMR spectrum (125 MHz) of 6-*O*-methyl-pereniporin A (**3**) in  $\text{CD}_3\text{OD}$ .

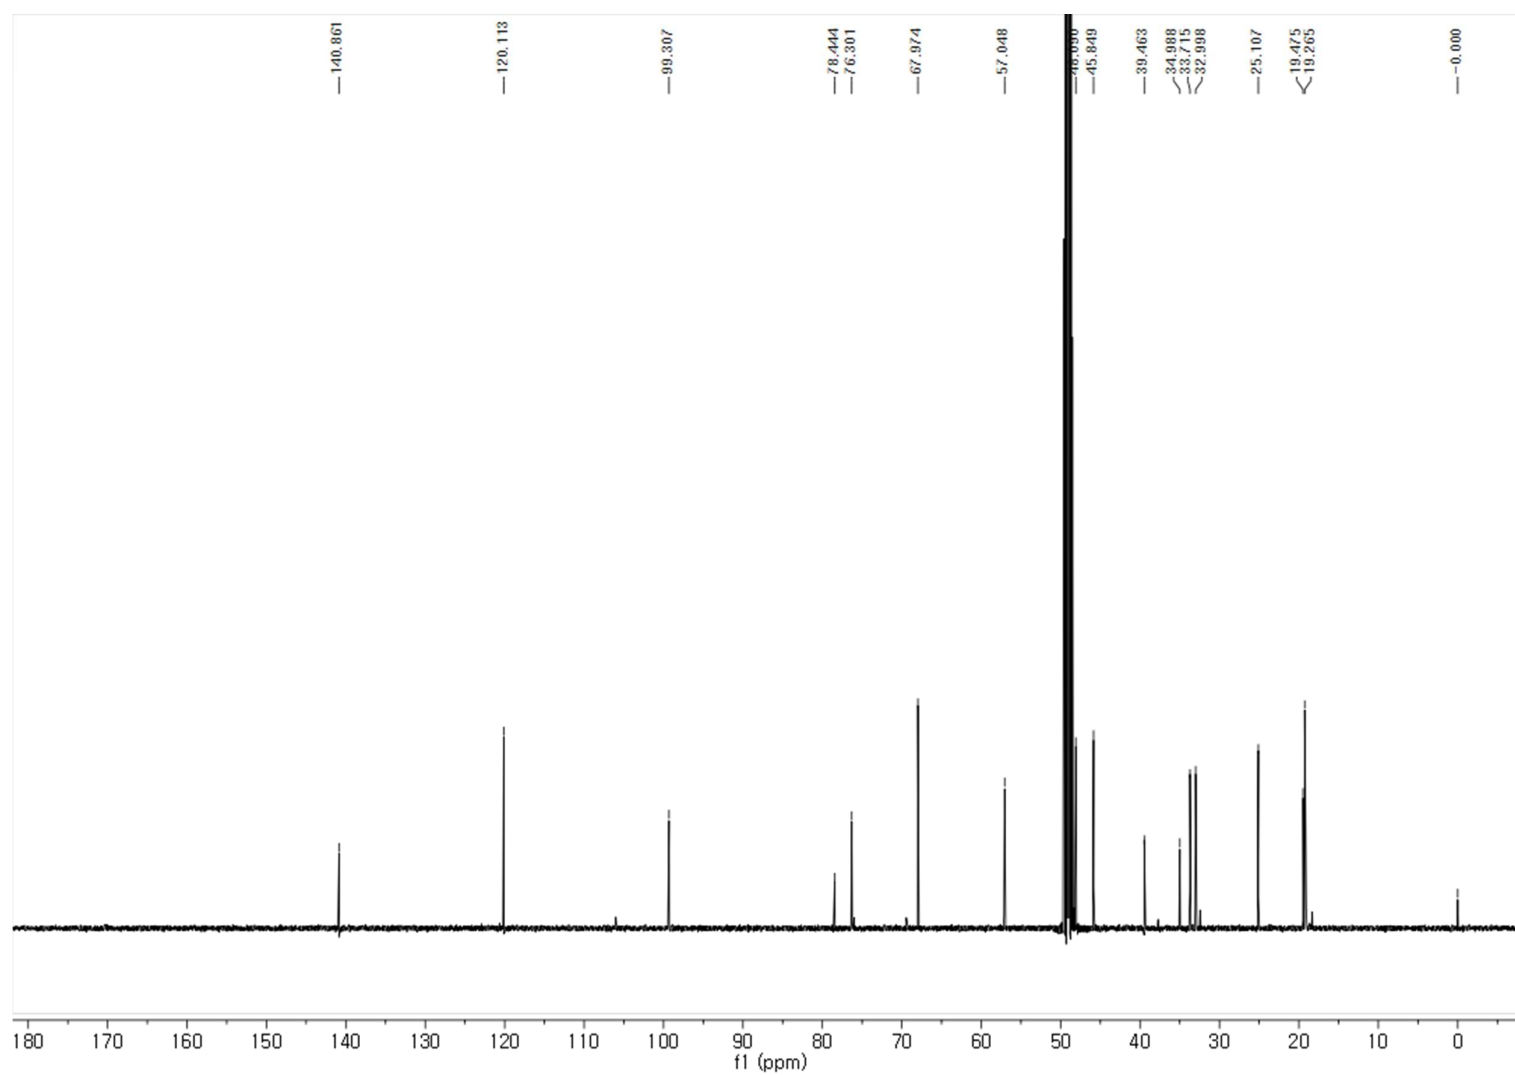



**S17.** HSQC NMR spectrum of 6-*O*-methyl-pereniporin A (**3**) in CD<sub>3</sub>OD.

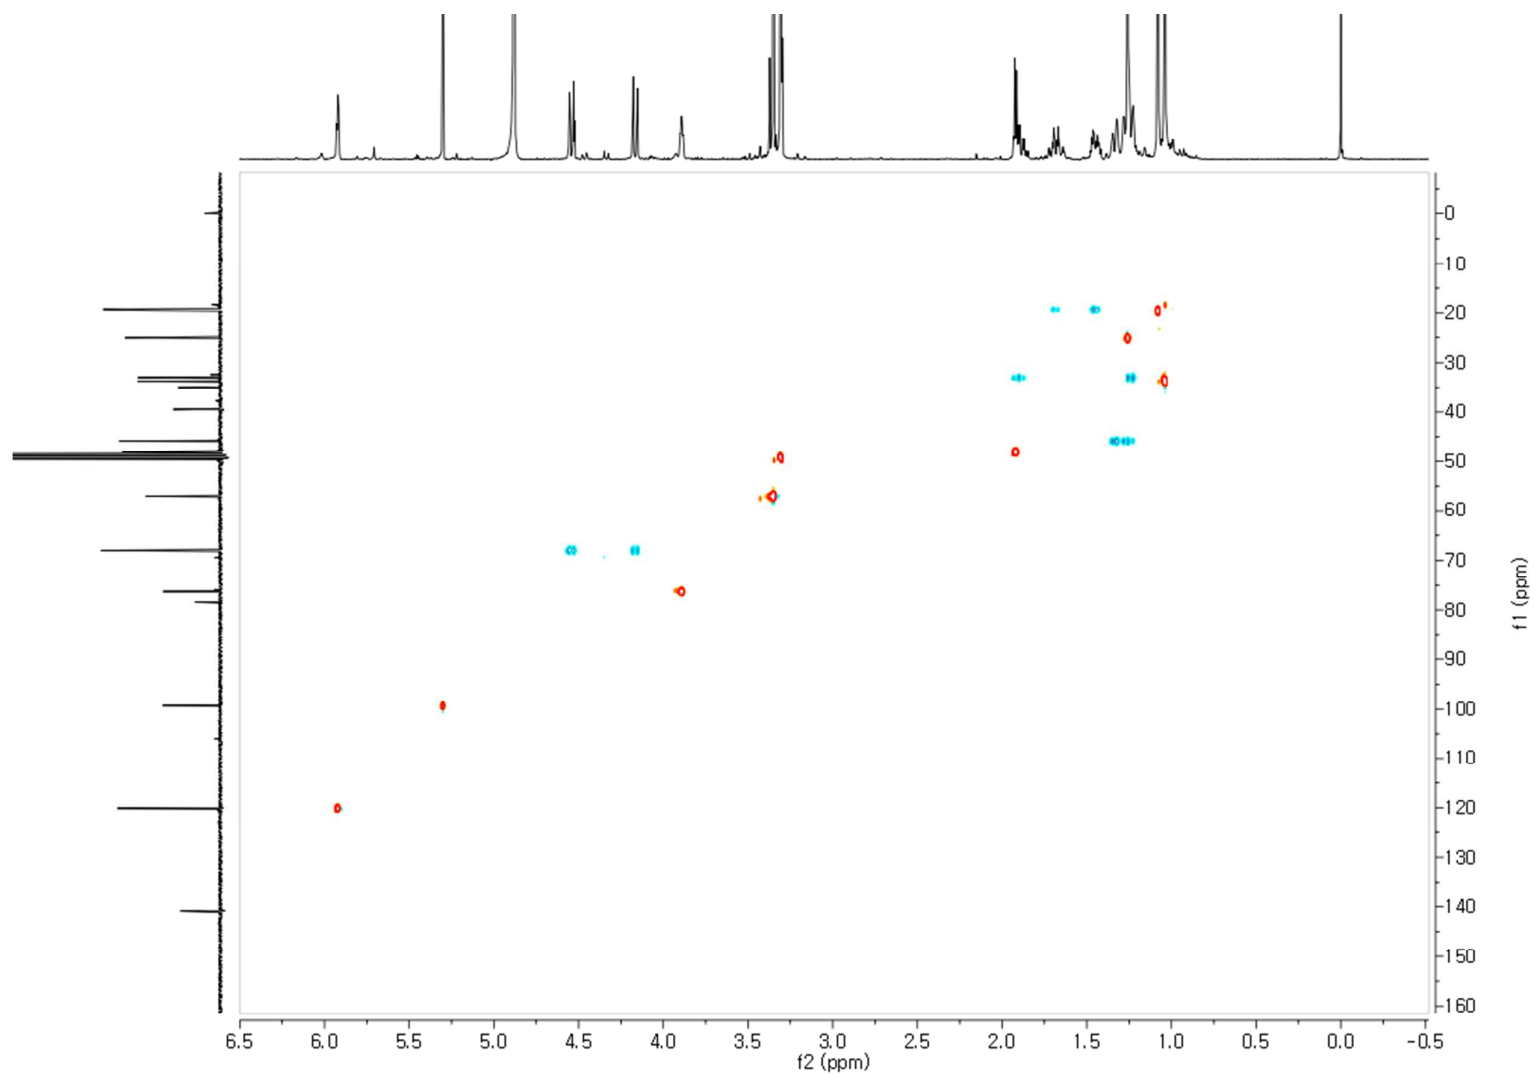

**S18.** HMBC NMR spectrum of 6-*O*-methyl-pereniporin A (**3**) in CD<sub>3</sub>OD.

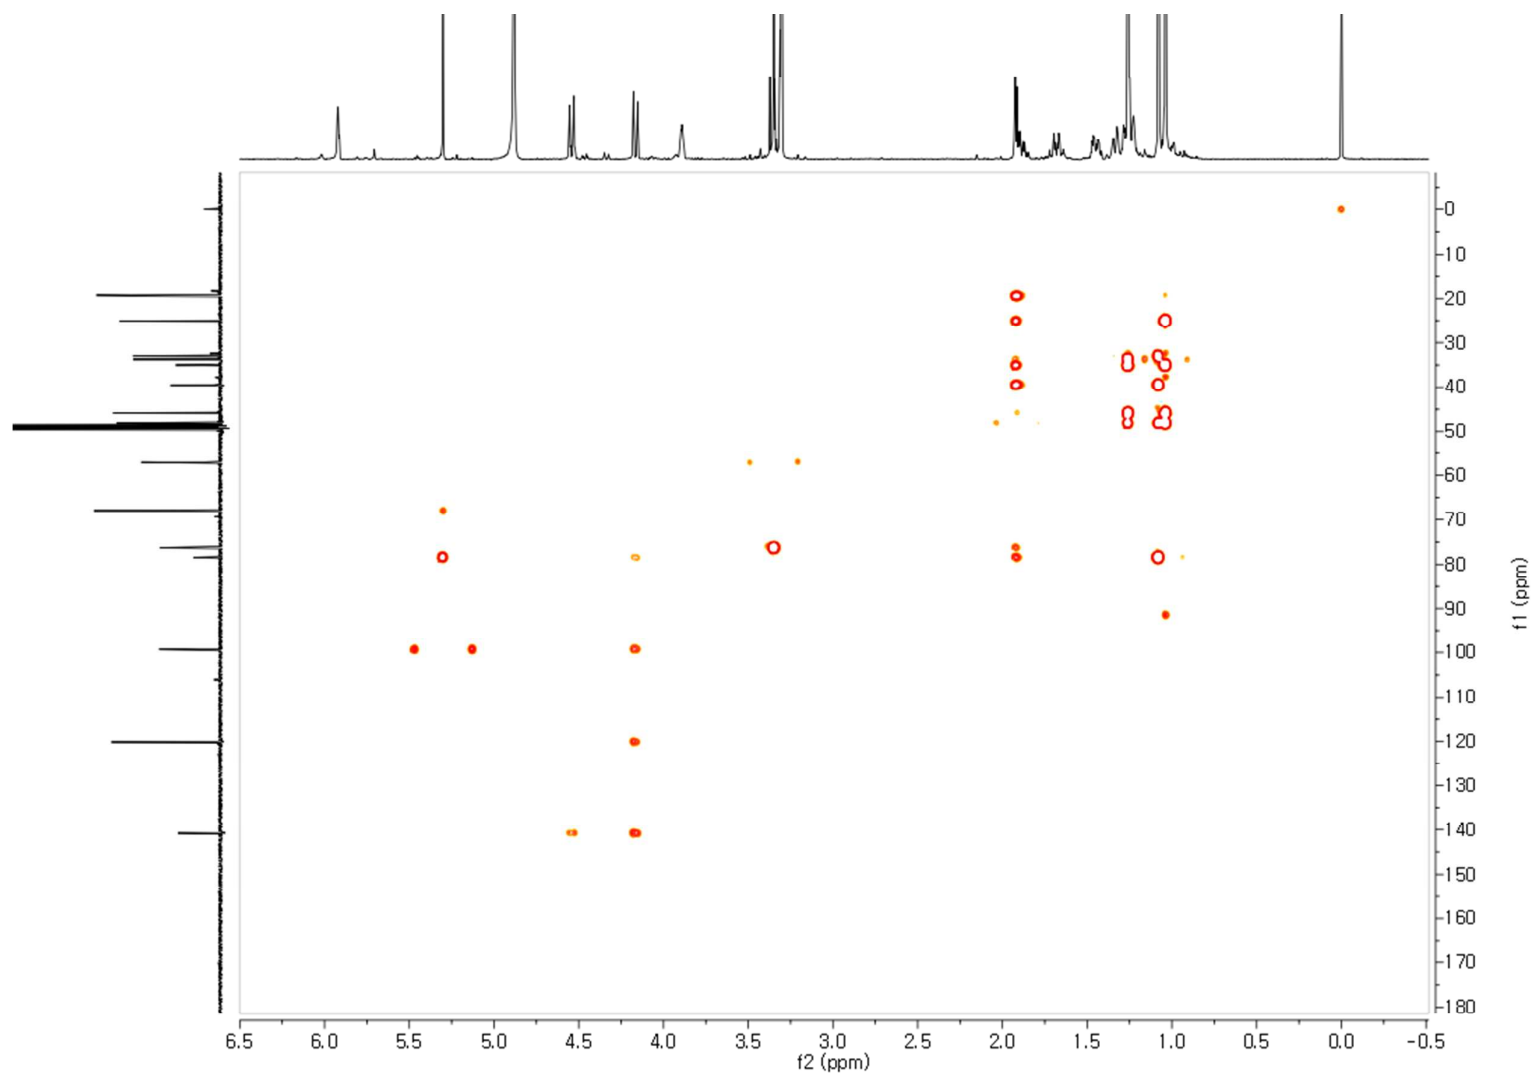

**S19.** COSY NMR spectrum of 6-*O*-methyl-pereniporin A (**3**) in CD<sub>3</sub>OD.

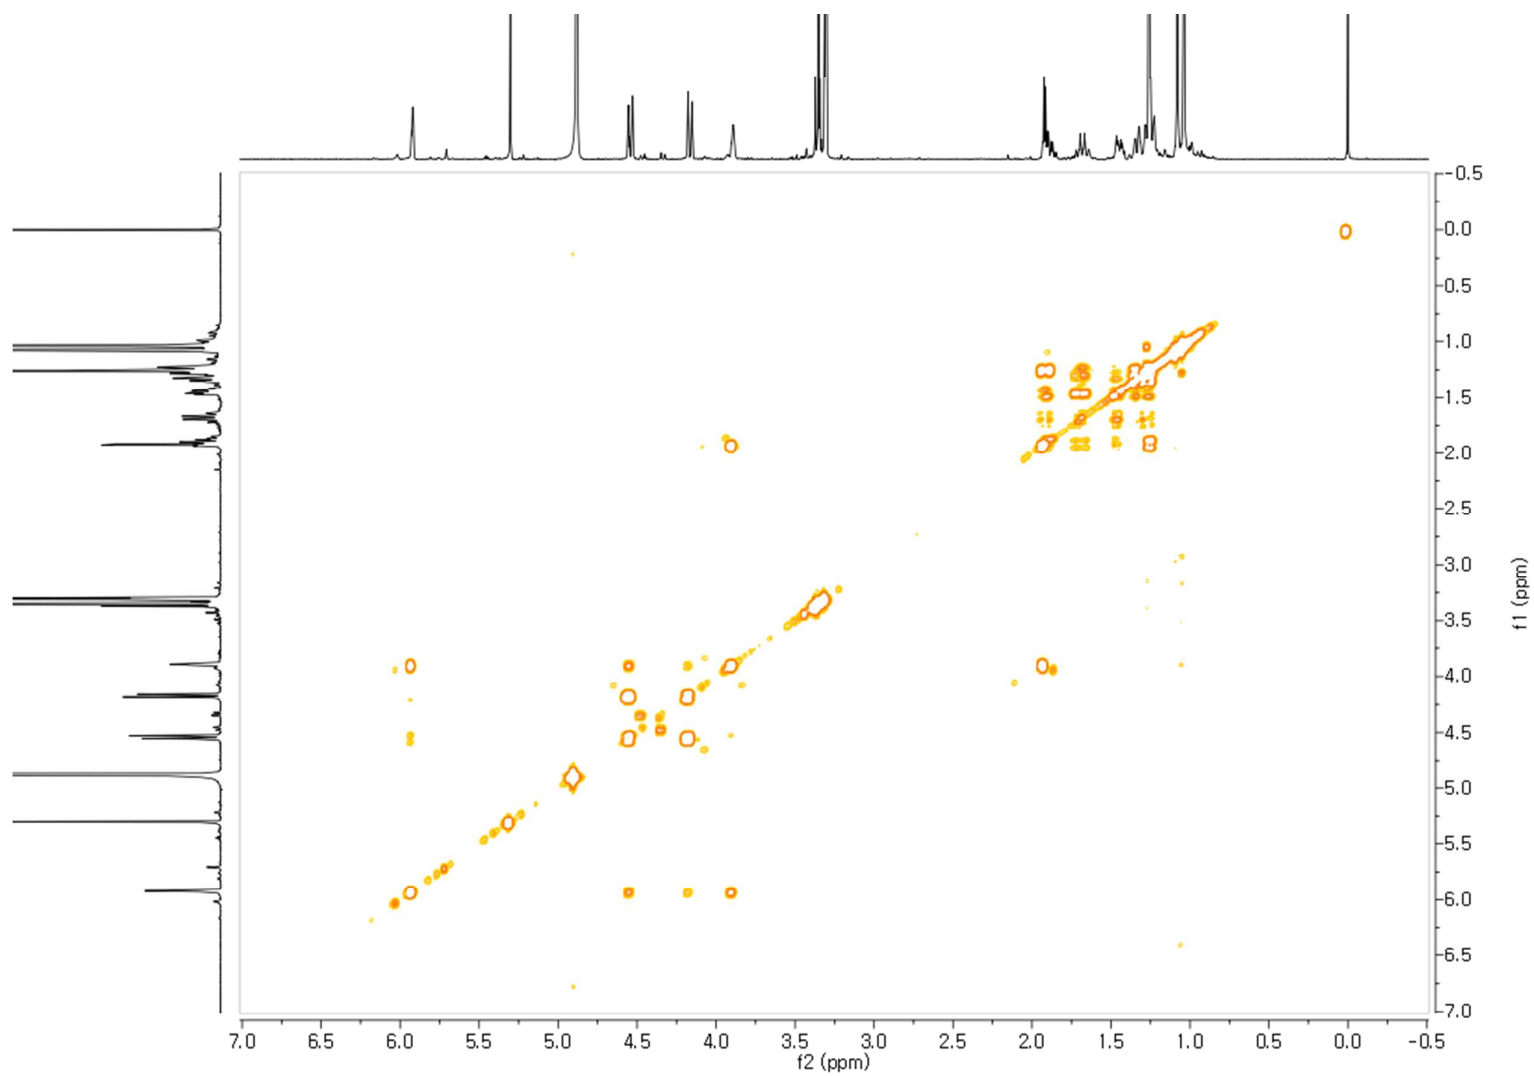

**S20.** NOESY NMR spectrum of 6-*O*-methyl-pereniporin A (**3**) in CD<sub>3</sub>OD.

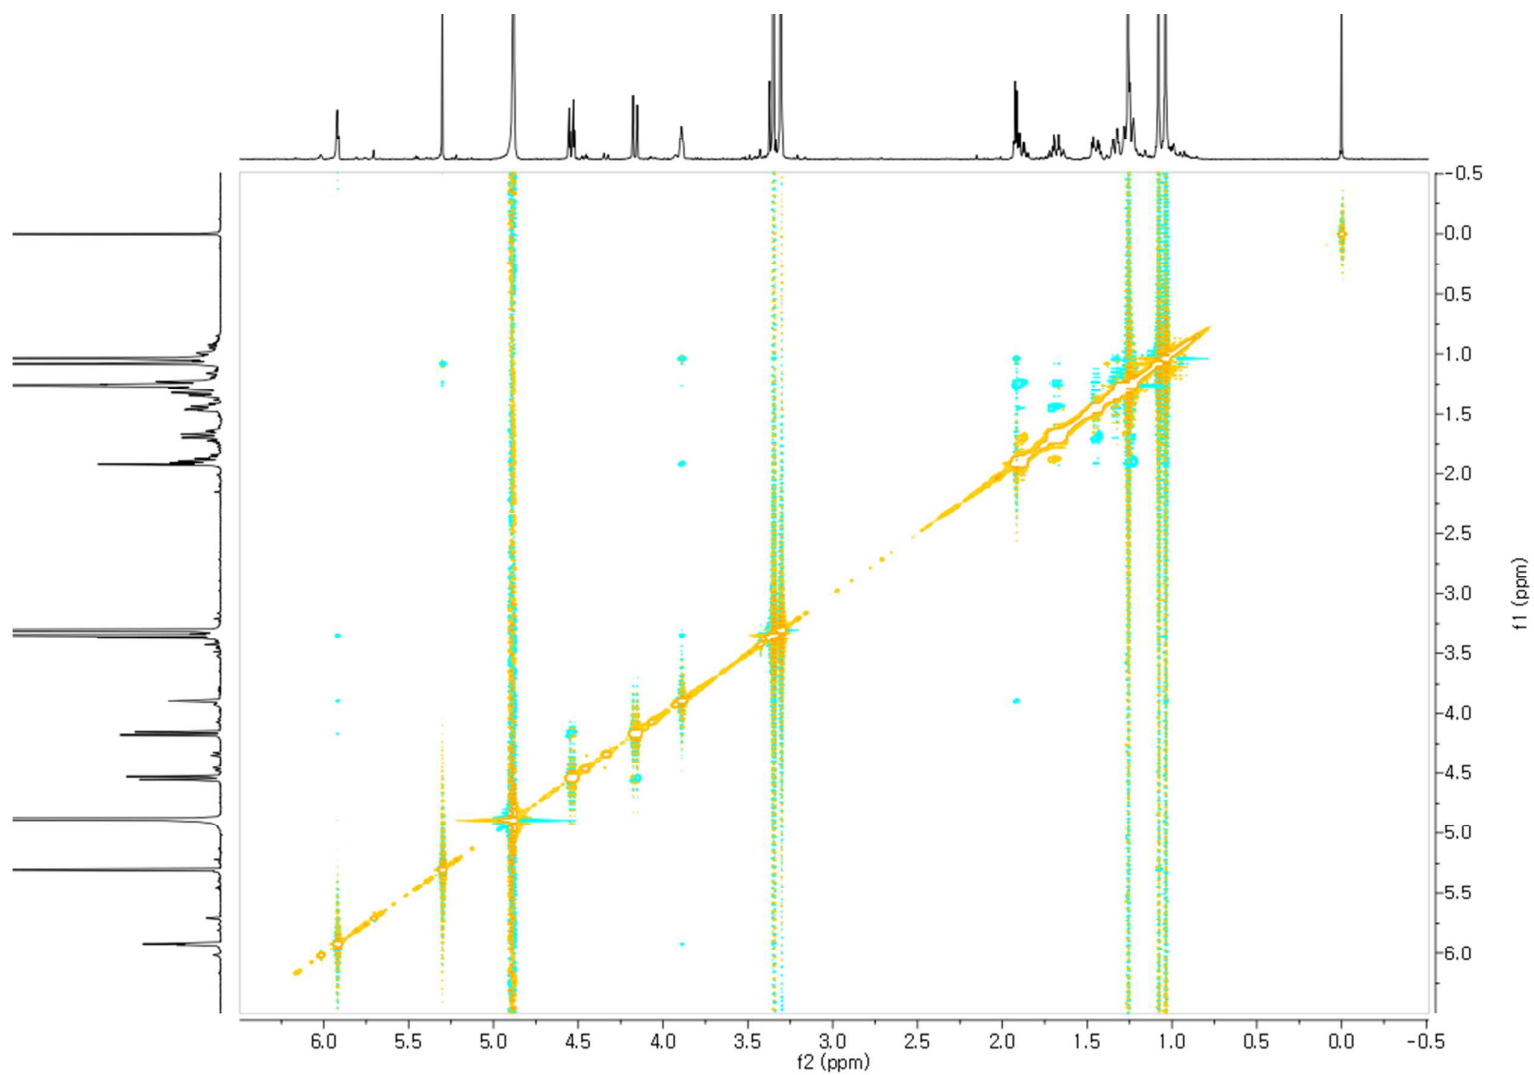

**S21.** HRESIMS spectrum of 6-*O*-methyl-pereniporin A (**3**).

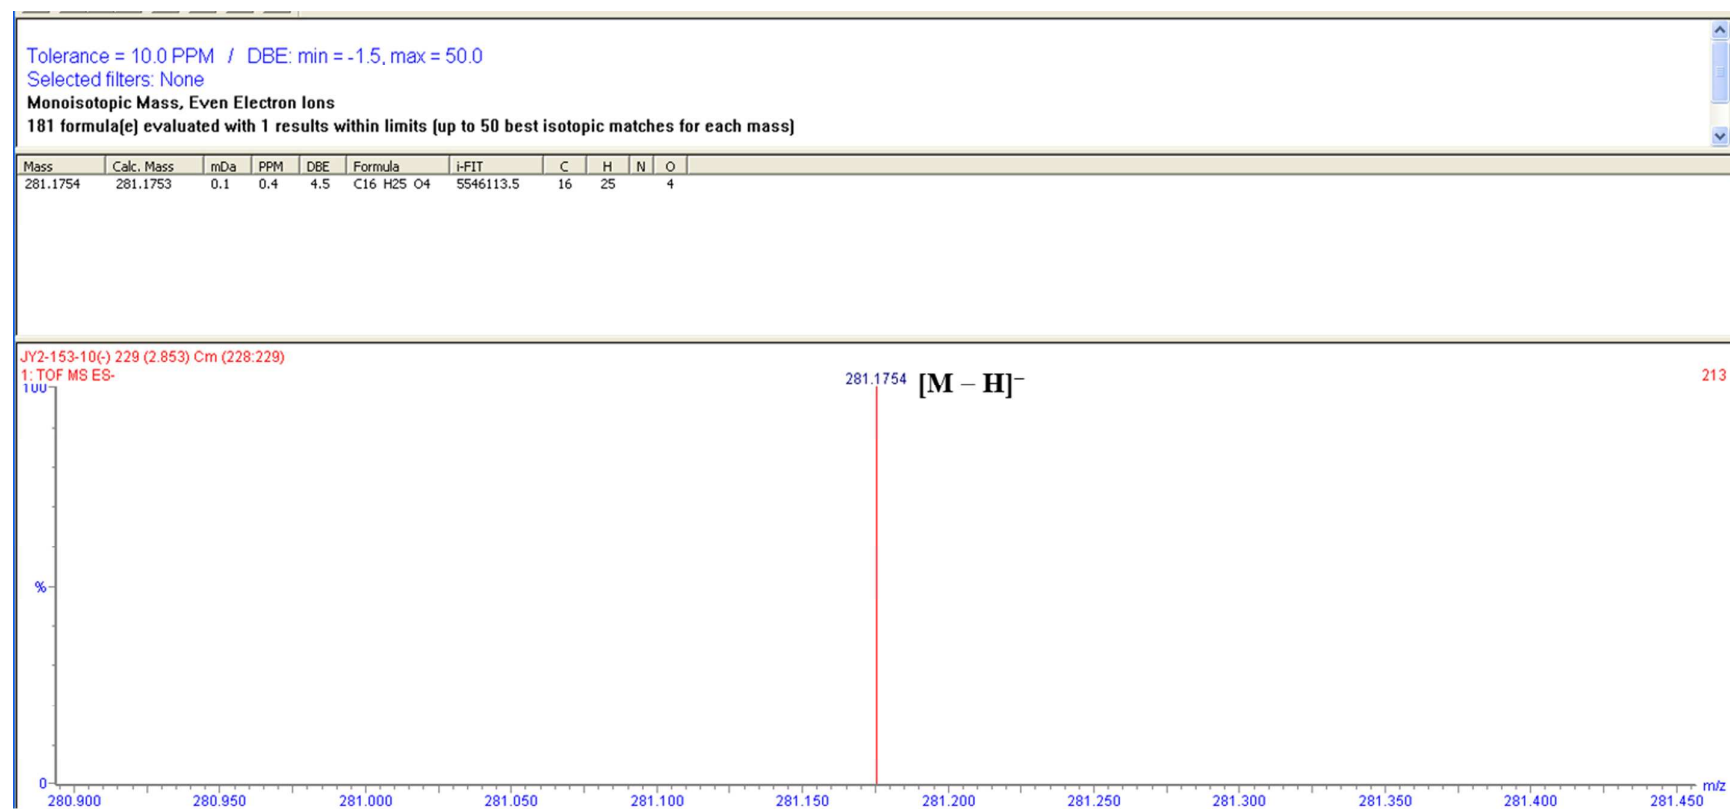

**S22.**  $^1\text{H}$  NMR spectrum (500 MHz) of 3 $\beta$ -hydroxy-6-*O*-acetyl-pereniporin A (**4**) in  $\text{CD}_3\text{OD}$ .

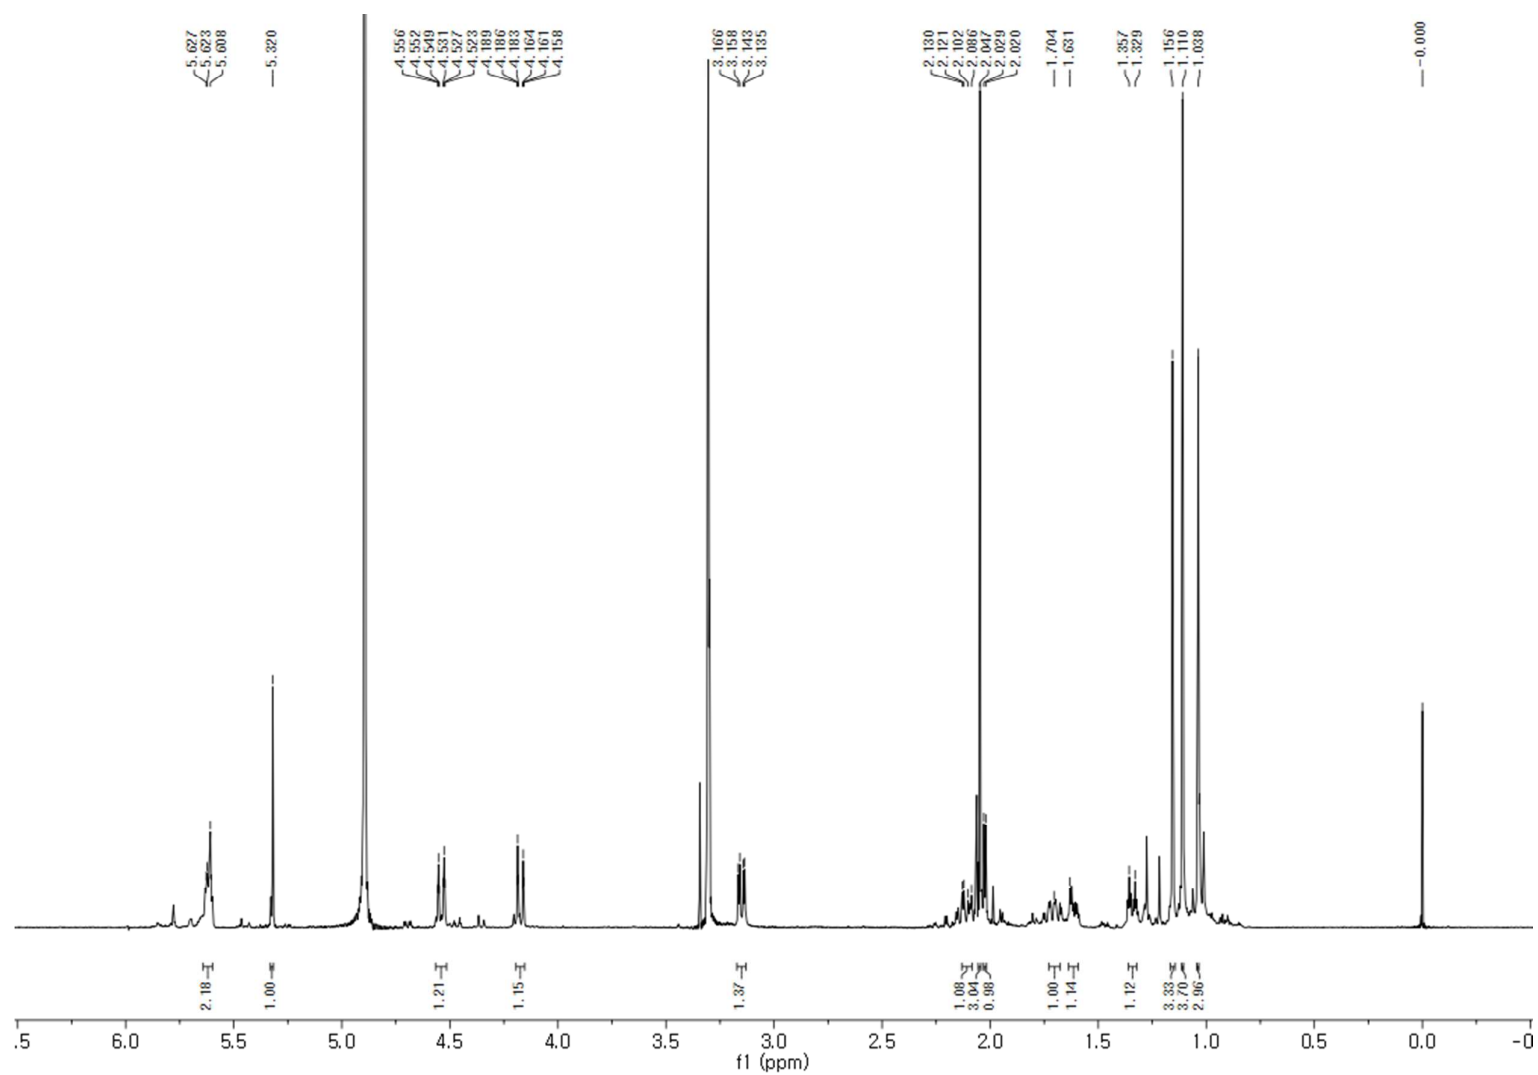

**S23.**  $^{13}\text{C}$  NMR spectrum (125 MHz) of 3 $\beta$ -hydroxy-6-*O*-acetyl-pereniporin A (**4**) in  $\text{CD}_3\text{OD}$ .

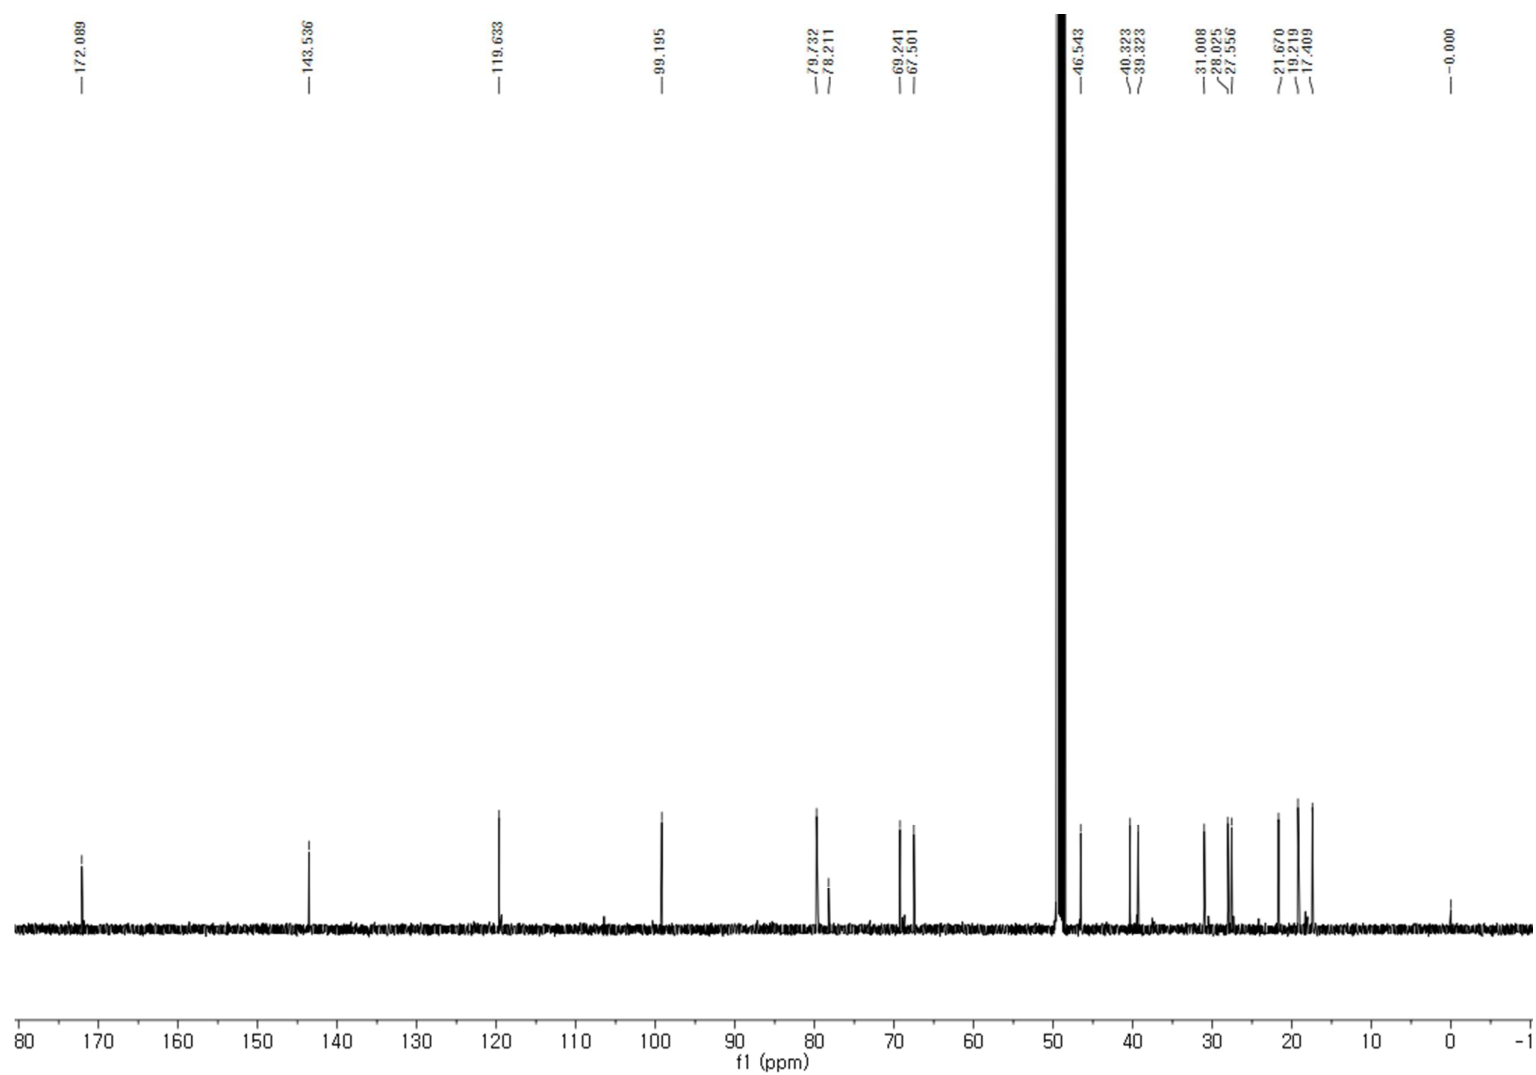

S24. HSQC NMR spectrum of 3 $\beta$ -hydroxy-6-*O*-acetyl-pereniporin A (**4**) in CD<sub>3</sub>OD.

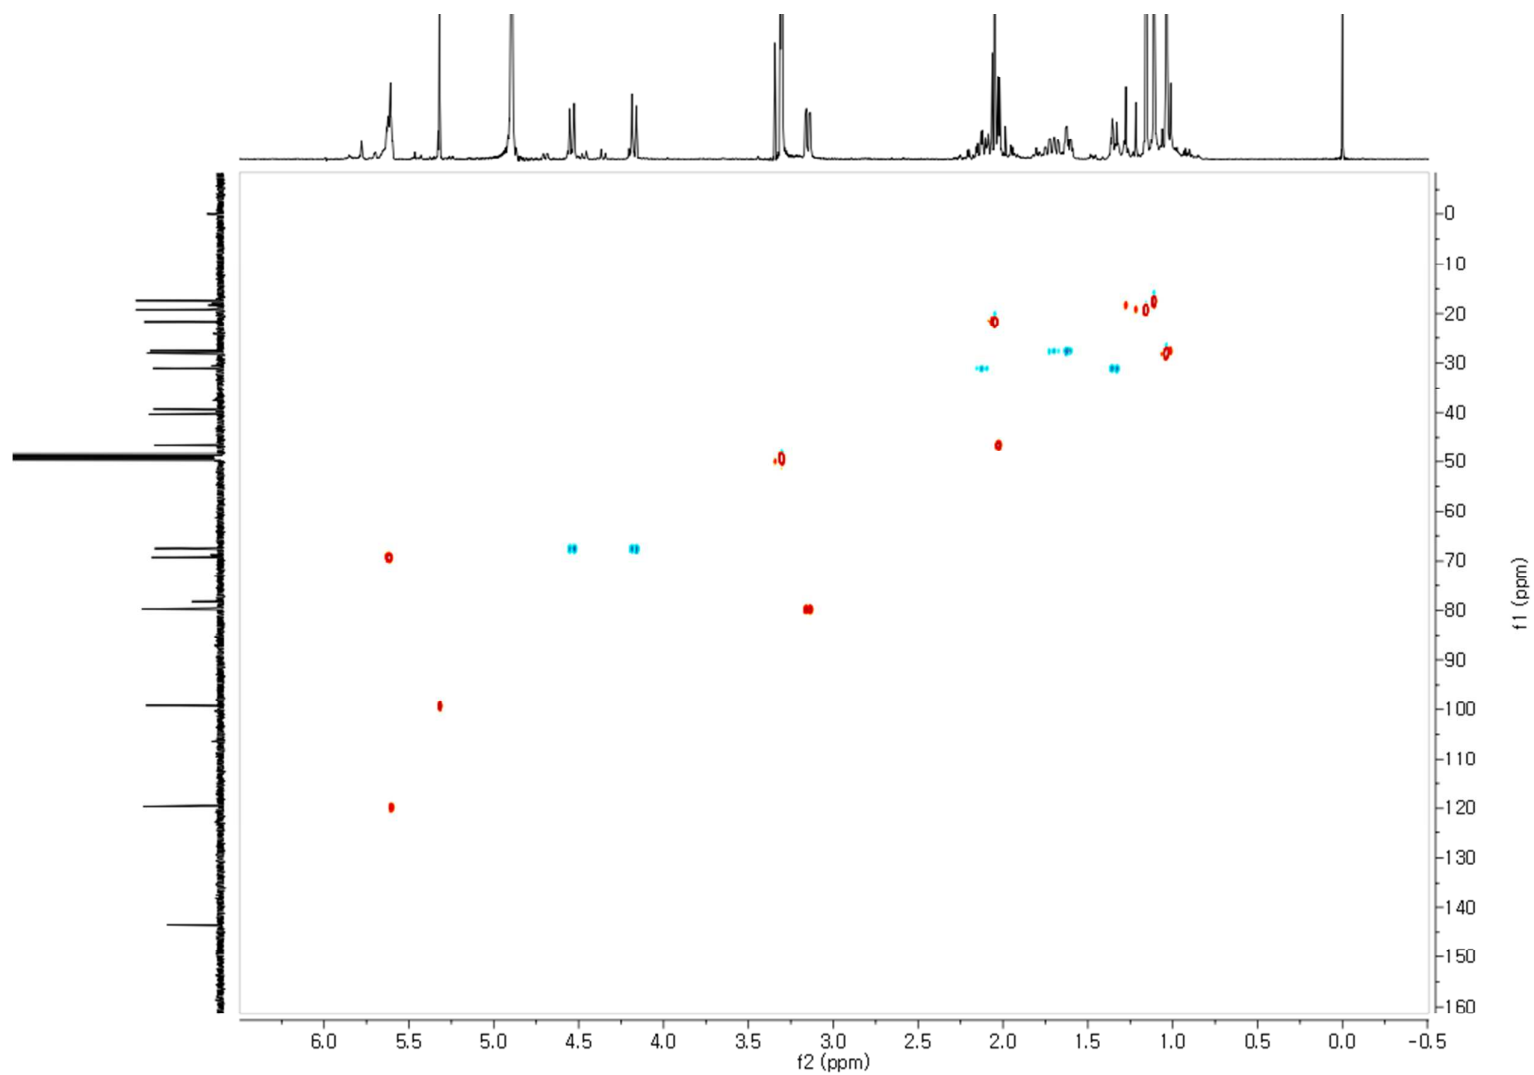



**S25.** HMBC NMR spectrum of 3 $\beta$ -hydroxy-6-*O*-acetyl-pereniporin A (**4**) in CD<sub>3</sub>OD.

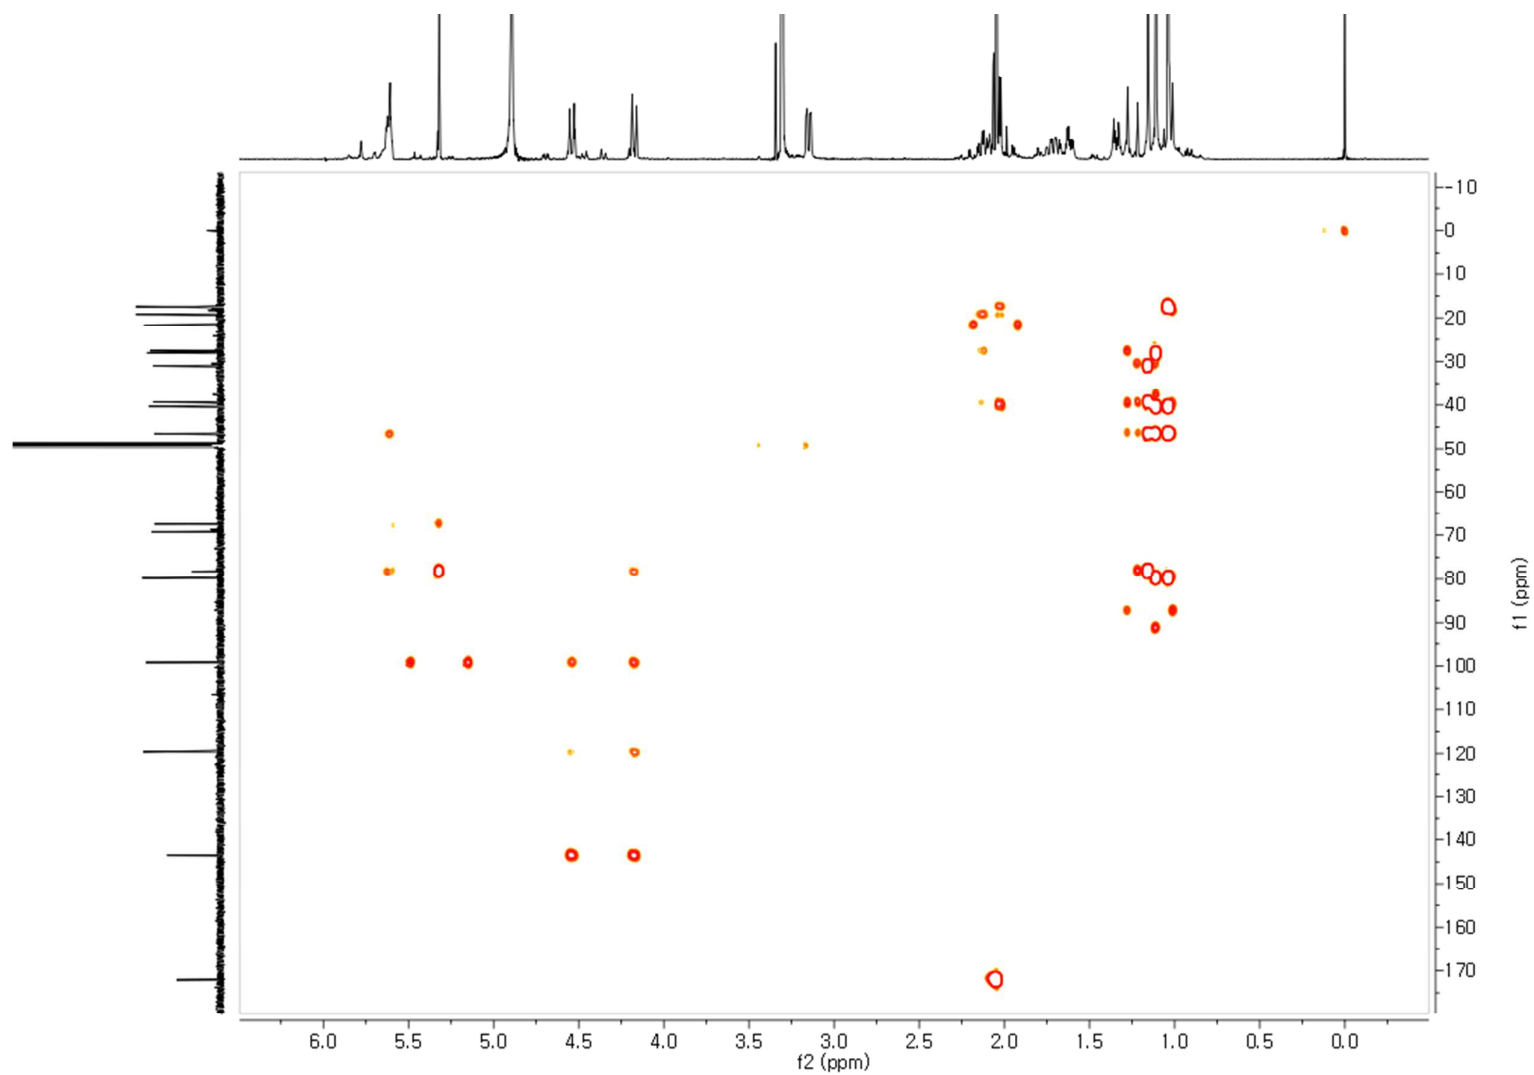

**S26.** COSY NMR spectrum of 3 $\beta$ -hydroxy-6-*O*-acetyl-pereniporin A (**4**) in CD<sub>3</sub>OD.

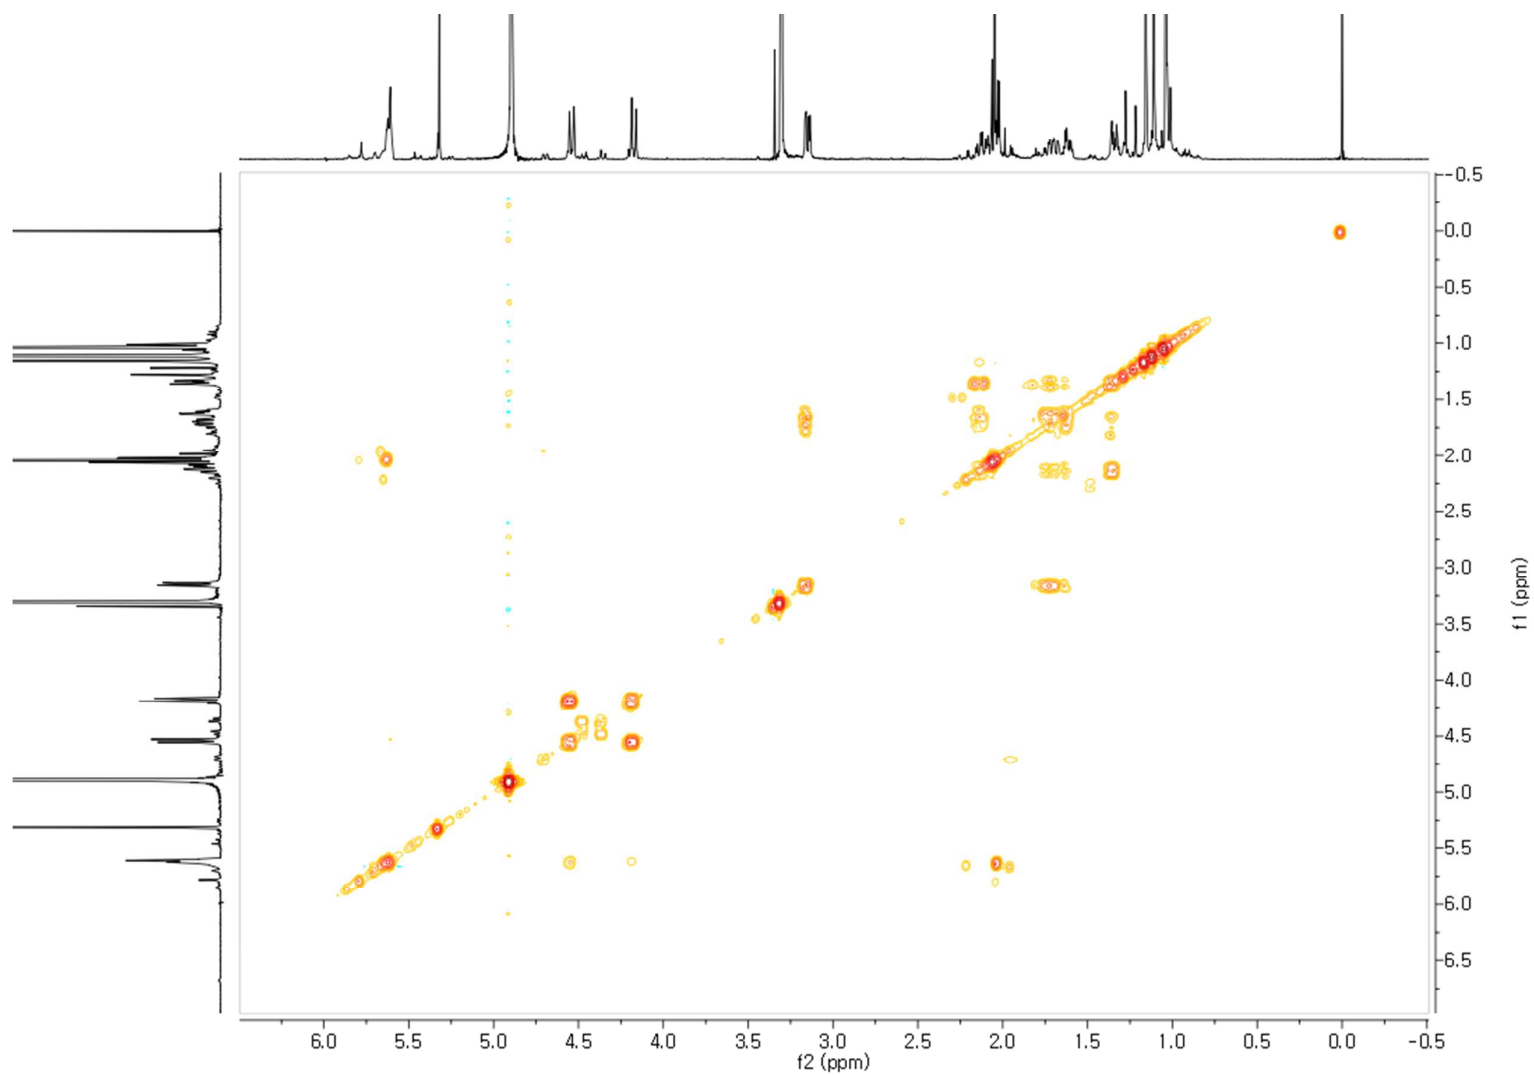

S27. NOESY NMR spectrum of 3 $\beta$ -hydroxy-6-*O*-acetyl-pereniporin A (**4**) in CD<sub>3</sub>OD.

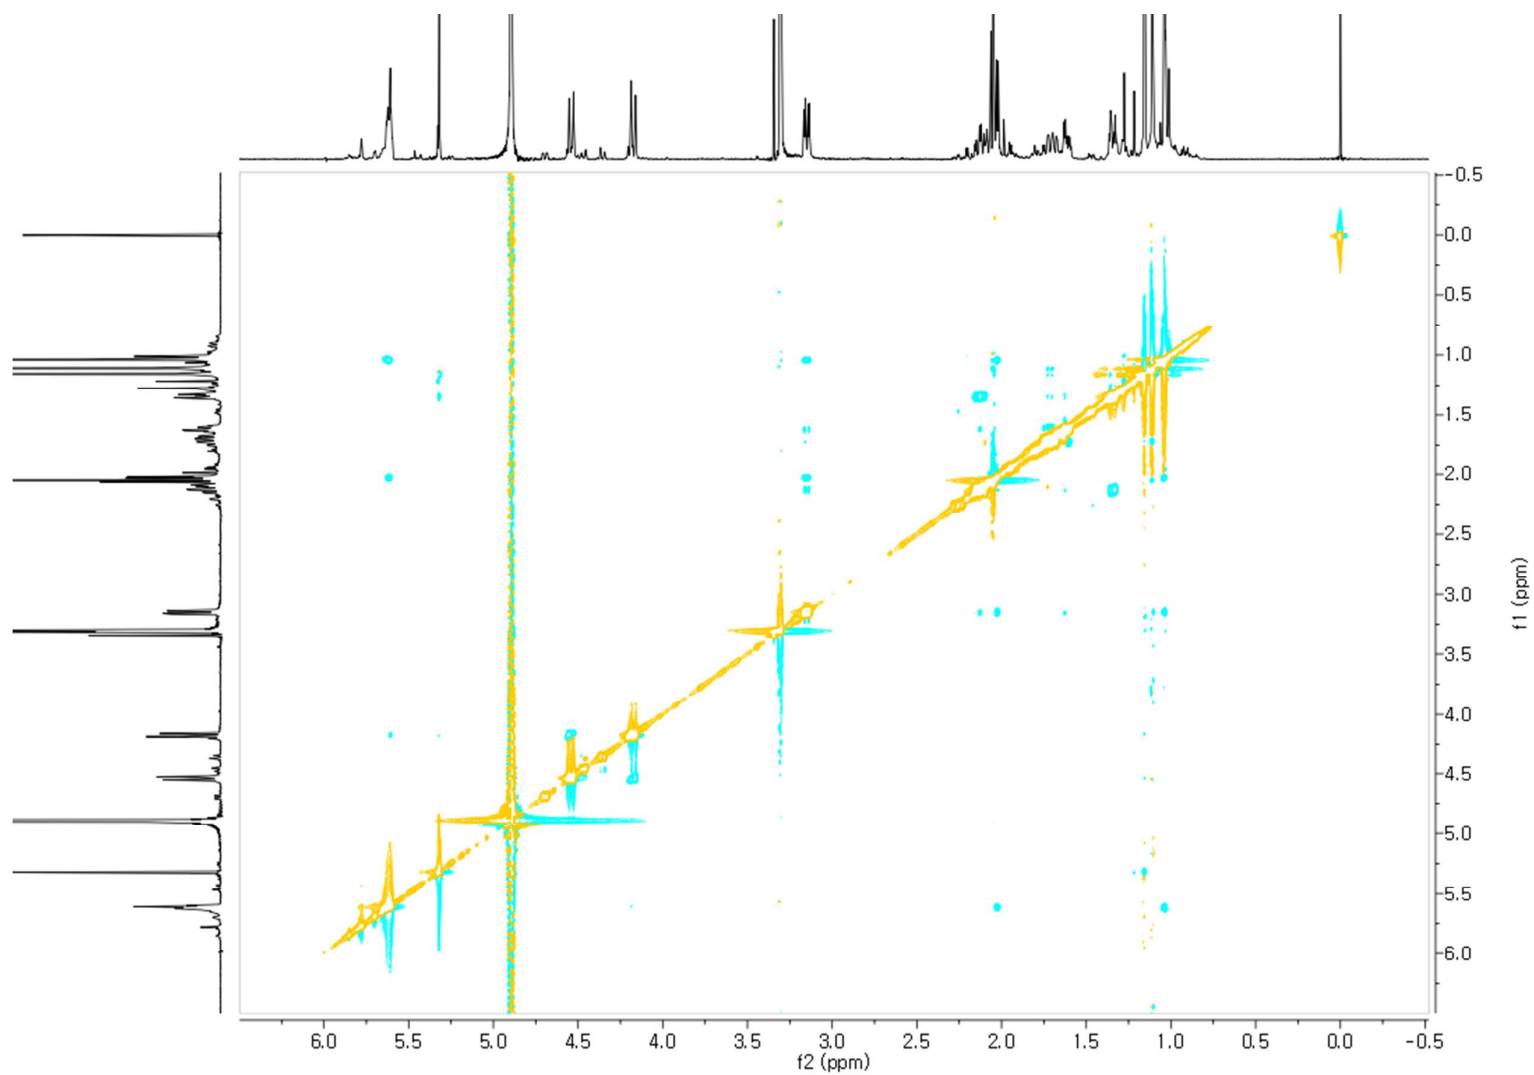

**S28.** HRESIMS spectrum of 3 $\beta$ -hydroxy-6-*O*-acetyl-pereniporin A (**4**).

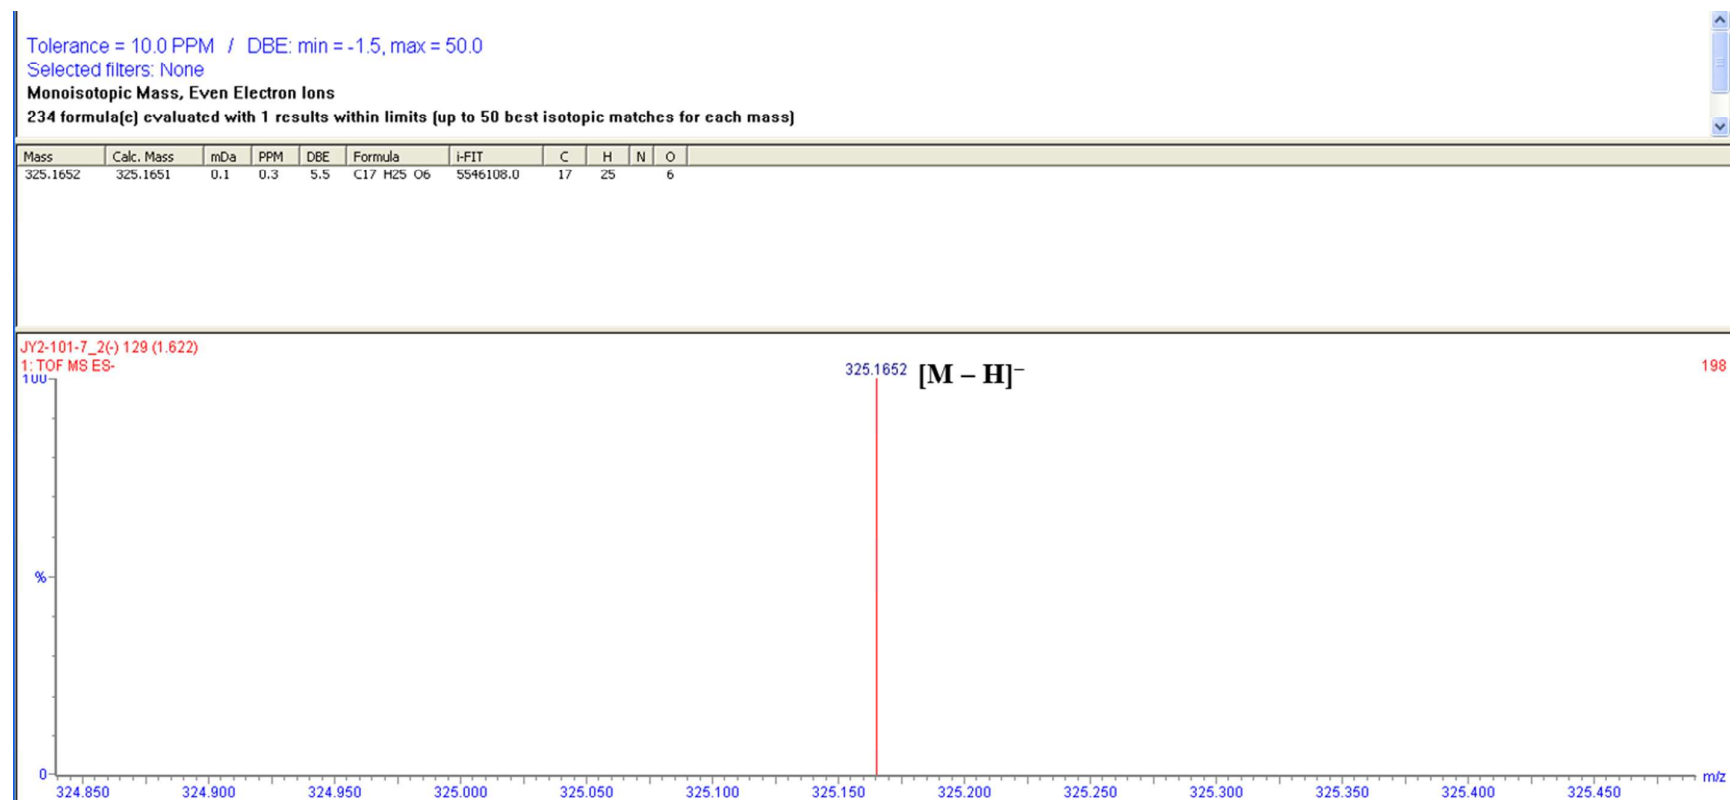

S29.  $^1\text{H}$  NMR spectrum (500 MHz) of 13-hydroxypereniporin A (**5**) in  $\text{CD}_3\text{OD}$ .

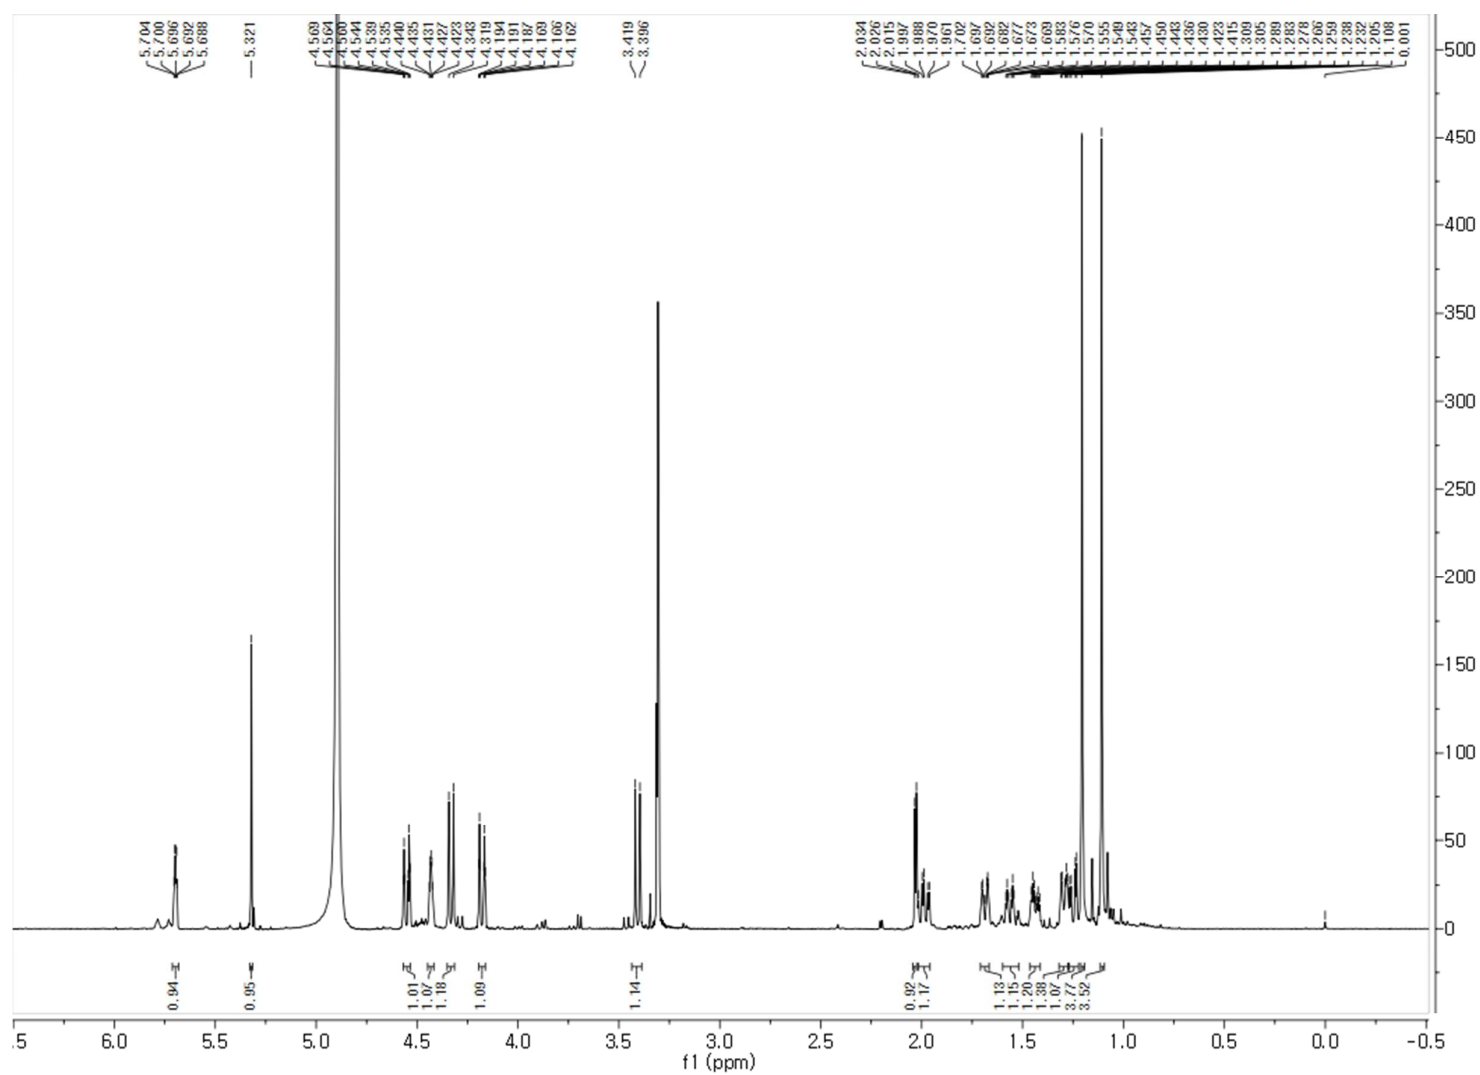

**S30.**  $^{13}\text{C}$  NMR spectrum (125 MHz) of 13-hydroxypereniporin A (**5**) in  $\text{CD}_3\text{OD}$ .

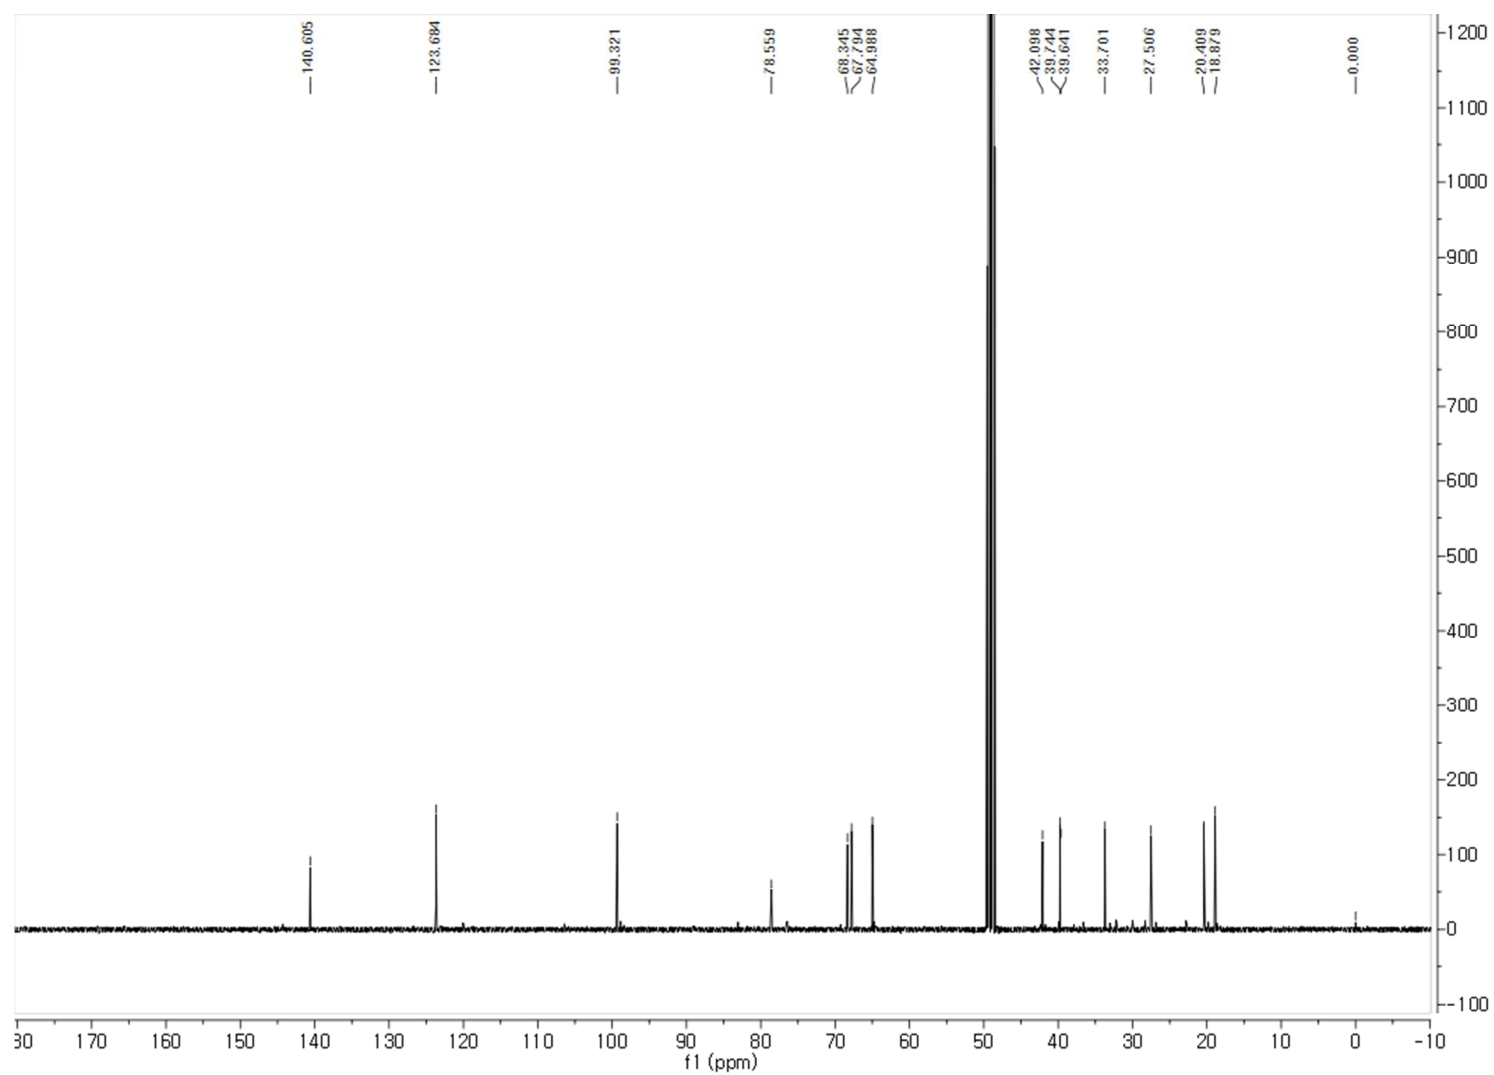

**S31.** HSQC NMR spectrum of 13-hydroxypereniporin A (**5**) in CD<sub>3</sub>OD.

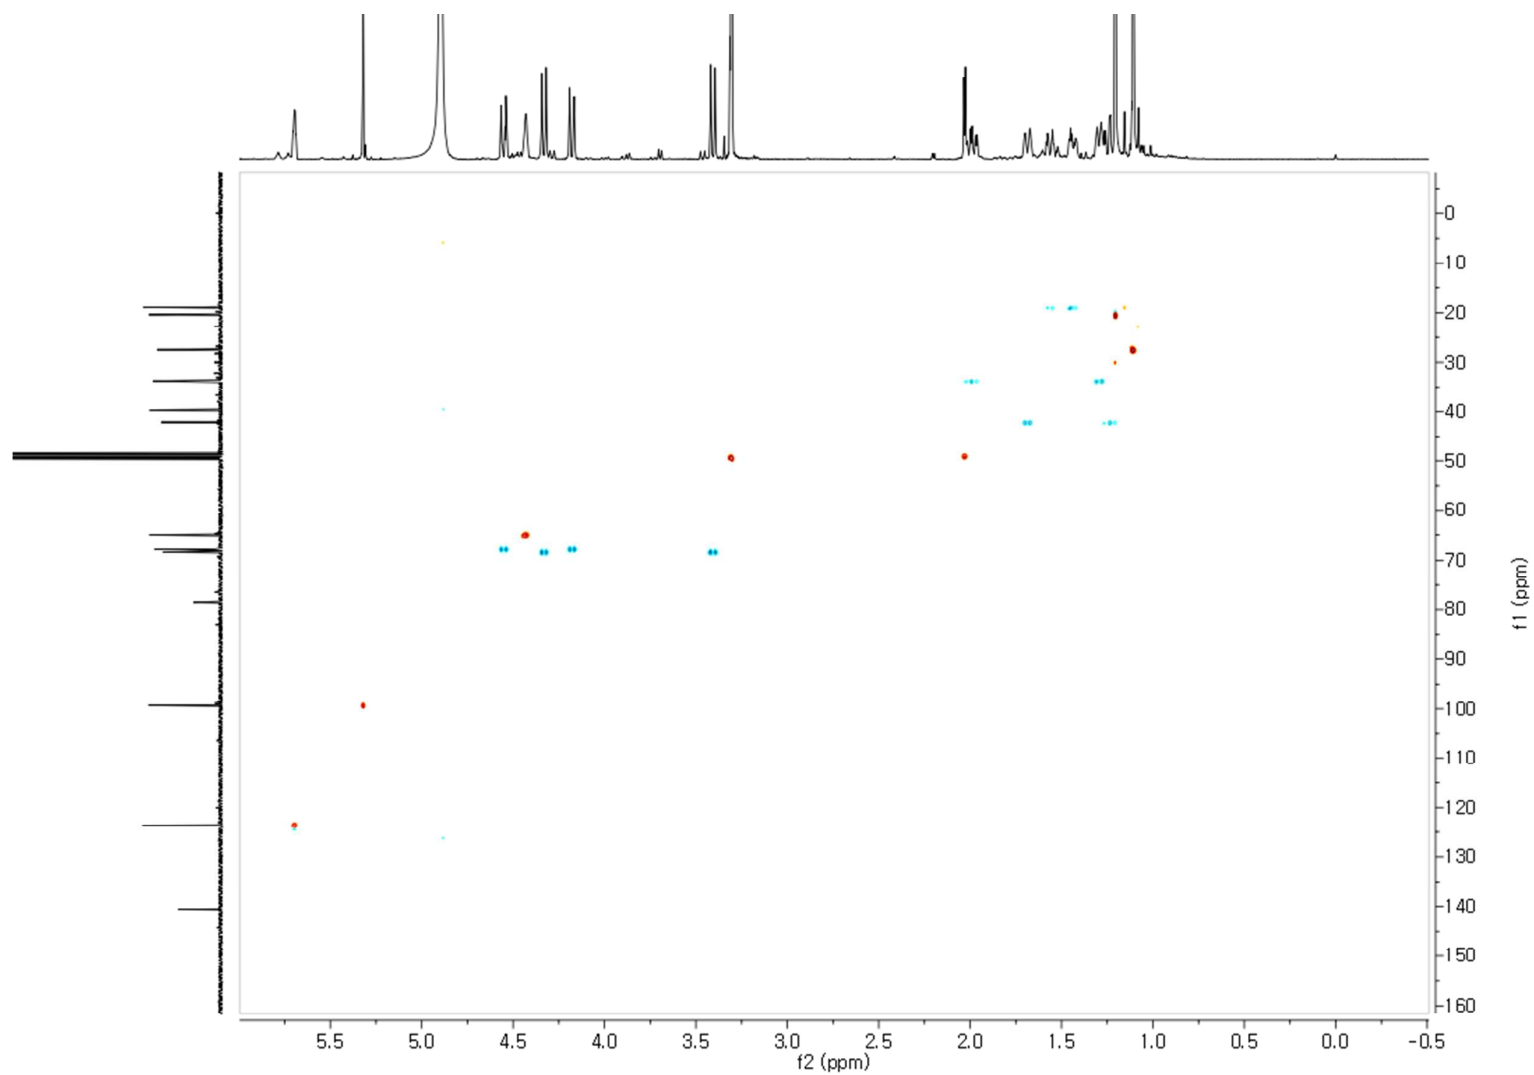

**S32.** HMBC NMR spectrum of 13-hydroxypereniporin A (**5**) in CD<sub>3</sub>OD.

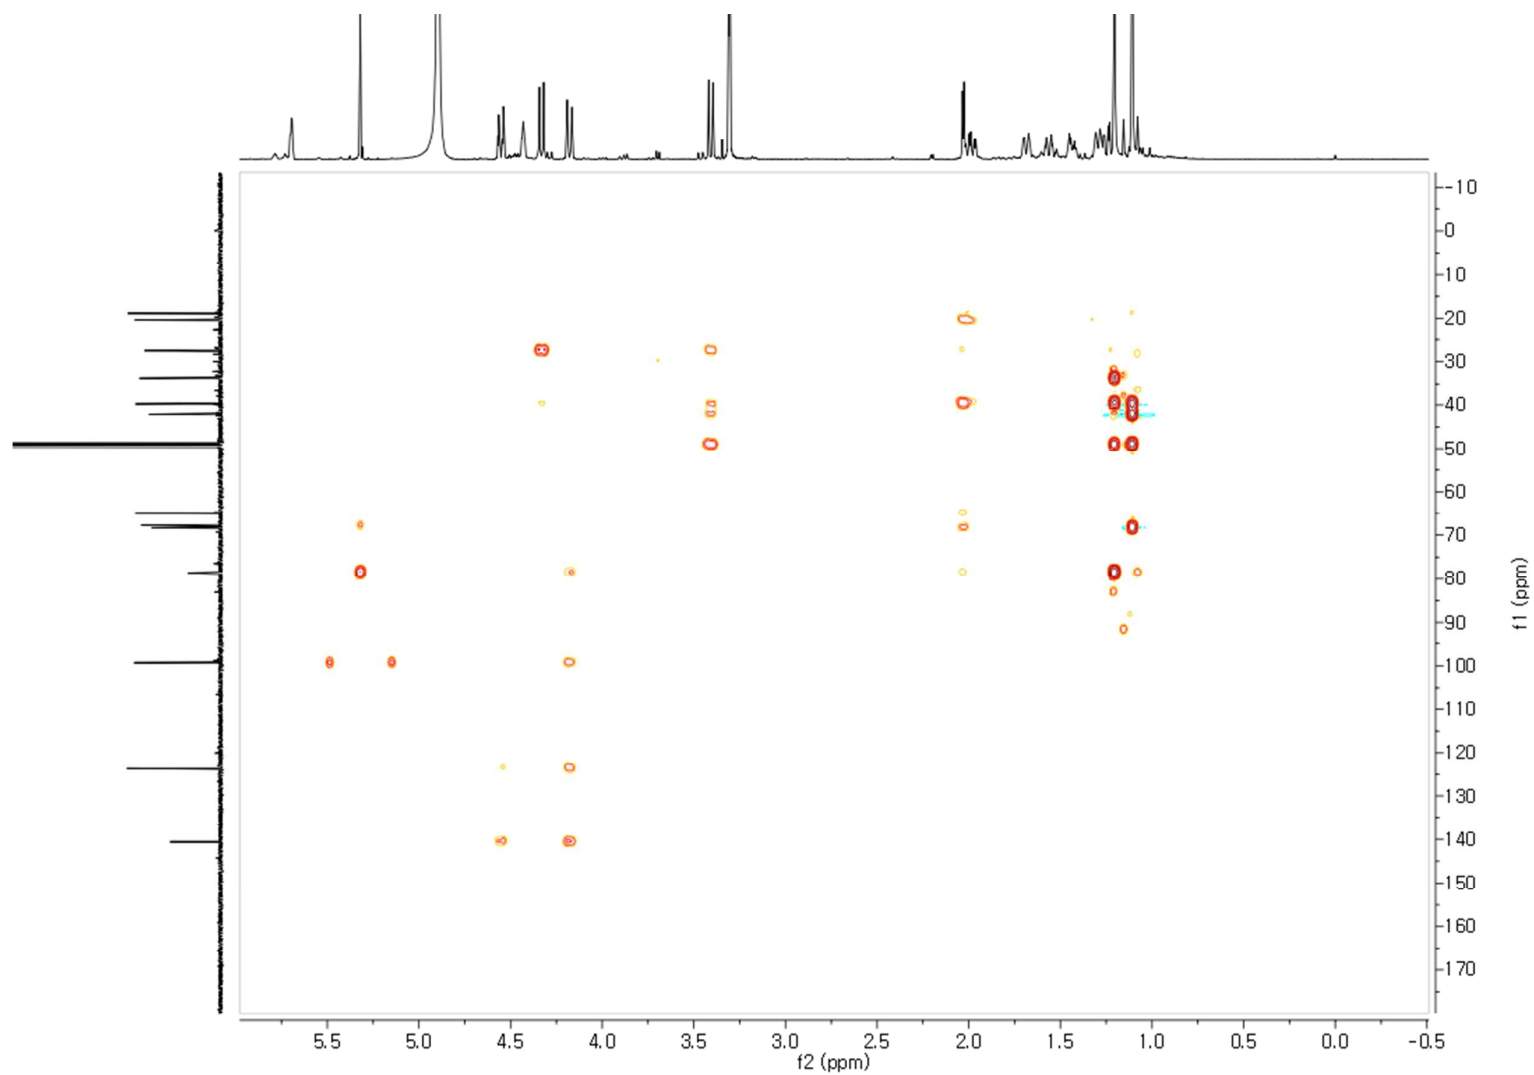



**S33.** COSY NMR spectrum of 13-hydroxypereniporin A (**5**) in CD<sub>3</sub>OD.

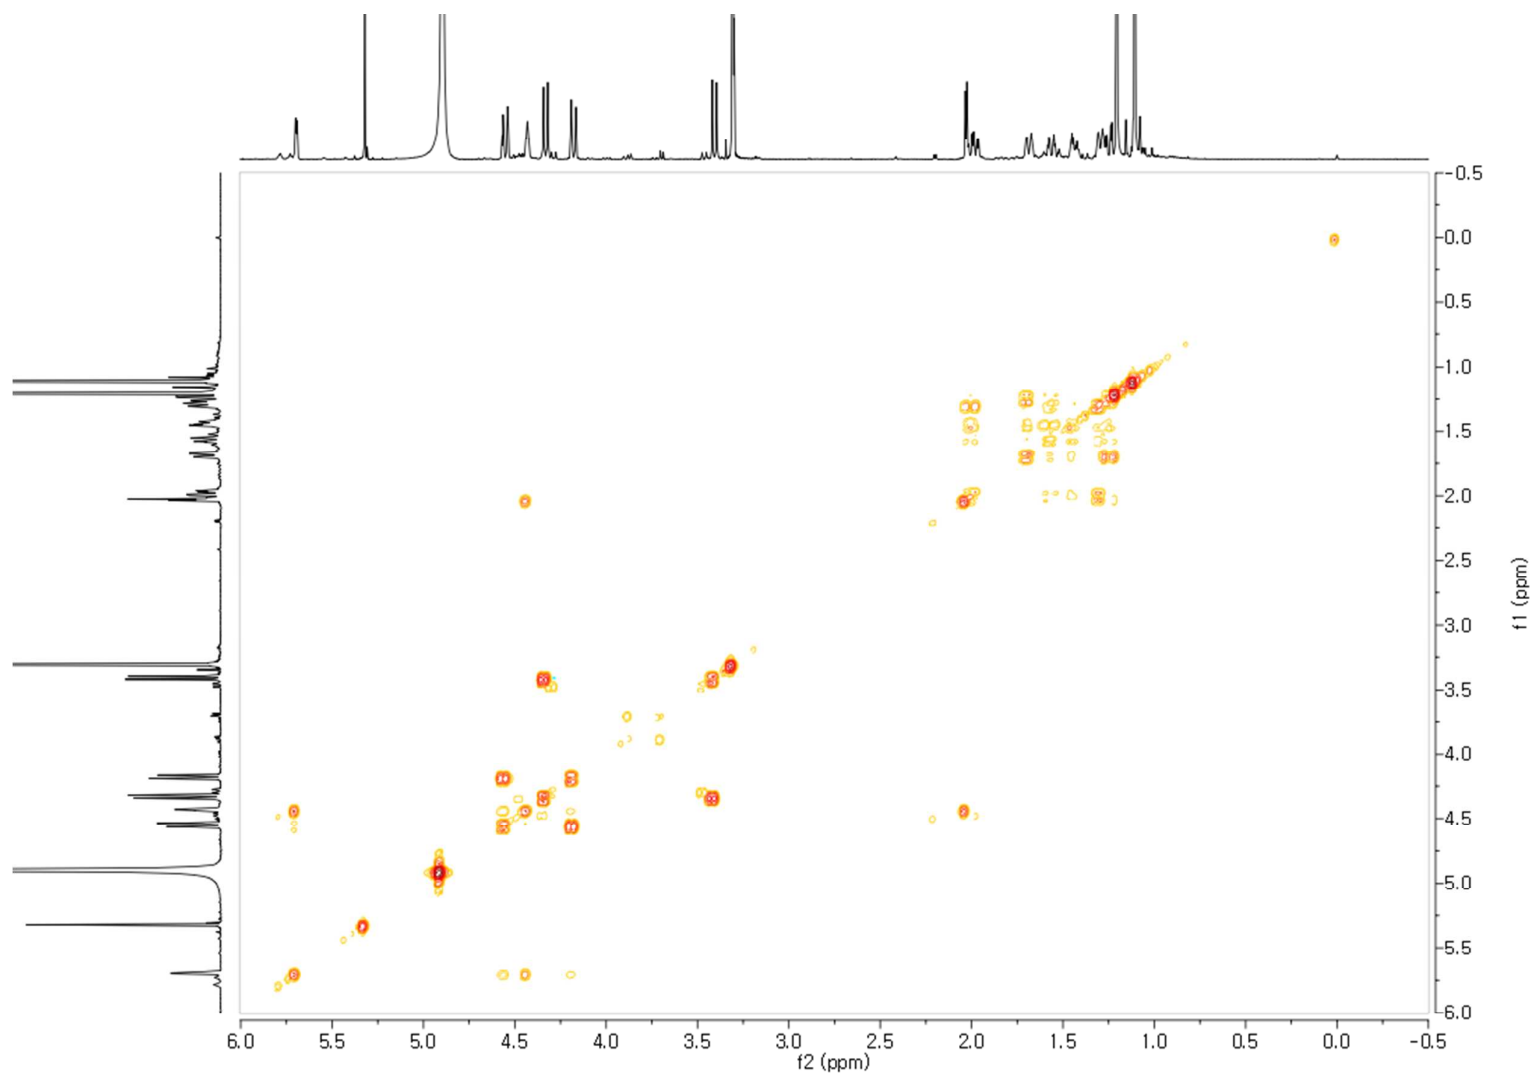

S34. NOESY NMR spectrum of 13-hydroxypereniporin A (**5**) in CD<sub>3</sub>OD.

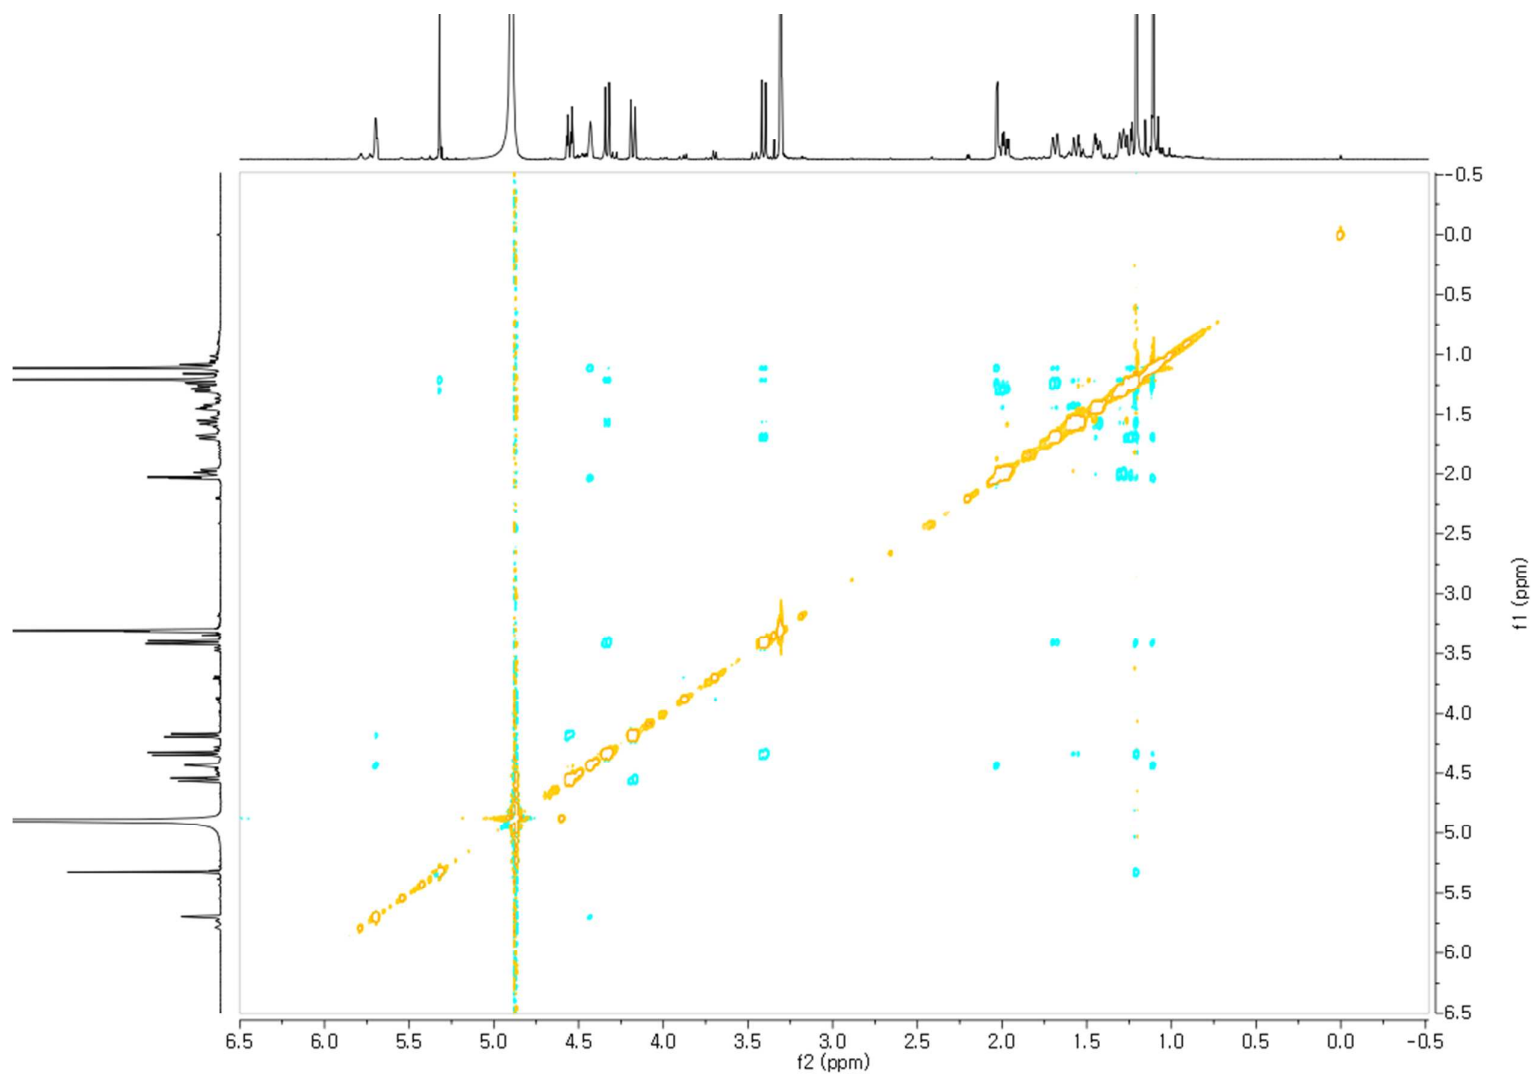

**S35.** HRESIMS spectrum of 13-hydroxypereniporin A (**5**).

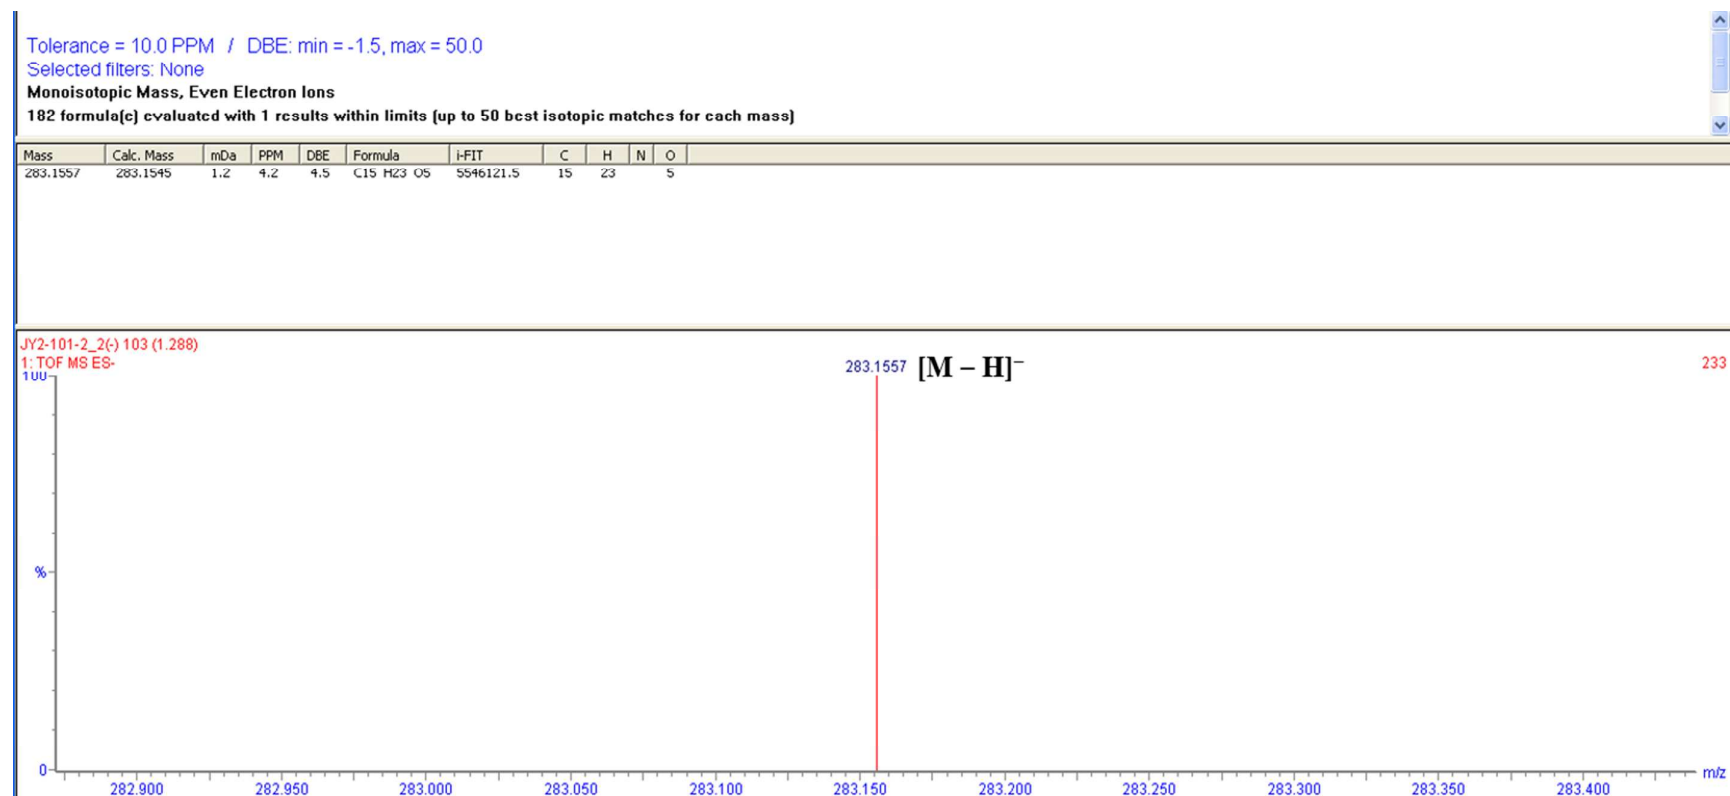

S36.  $^1\text{H}$  NMR spectrum (500 MHz) of 6-dehydroxy-6-oxopereniporin A (**6**) in  $\text{CD}_3\text{OD}$ .

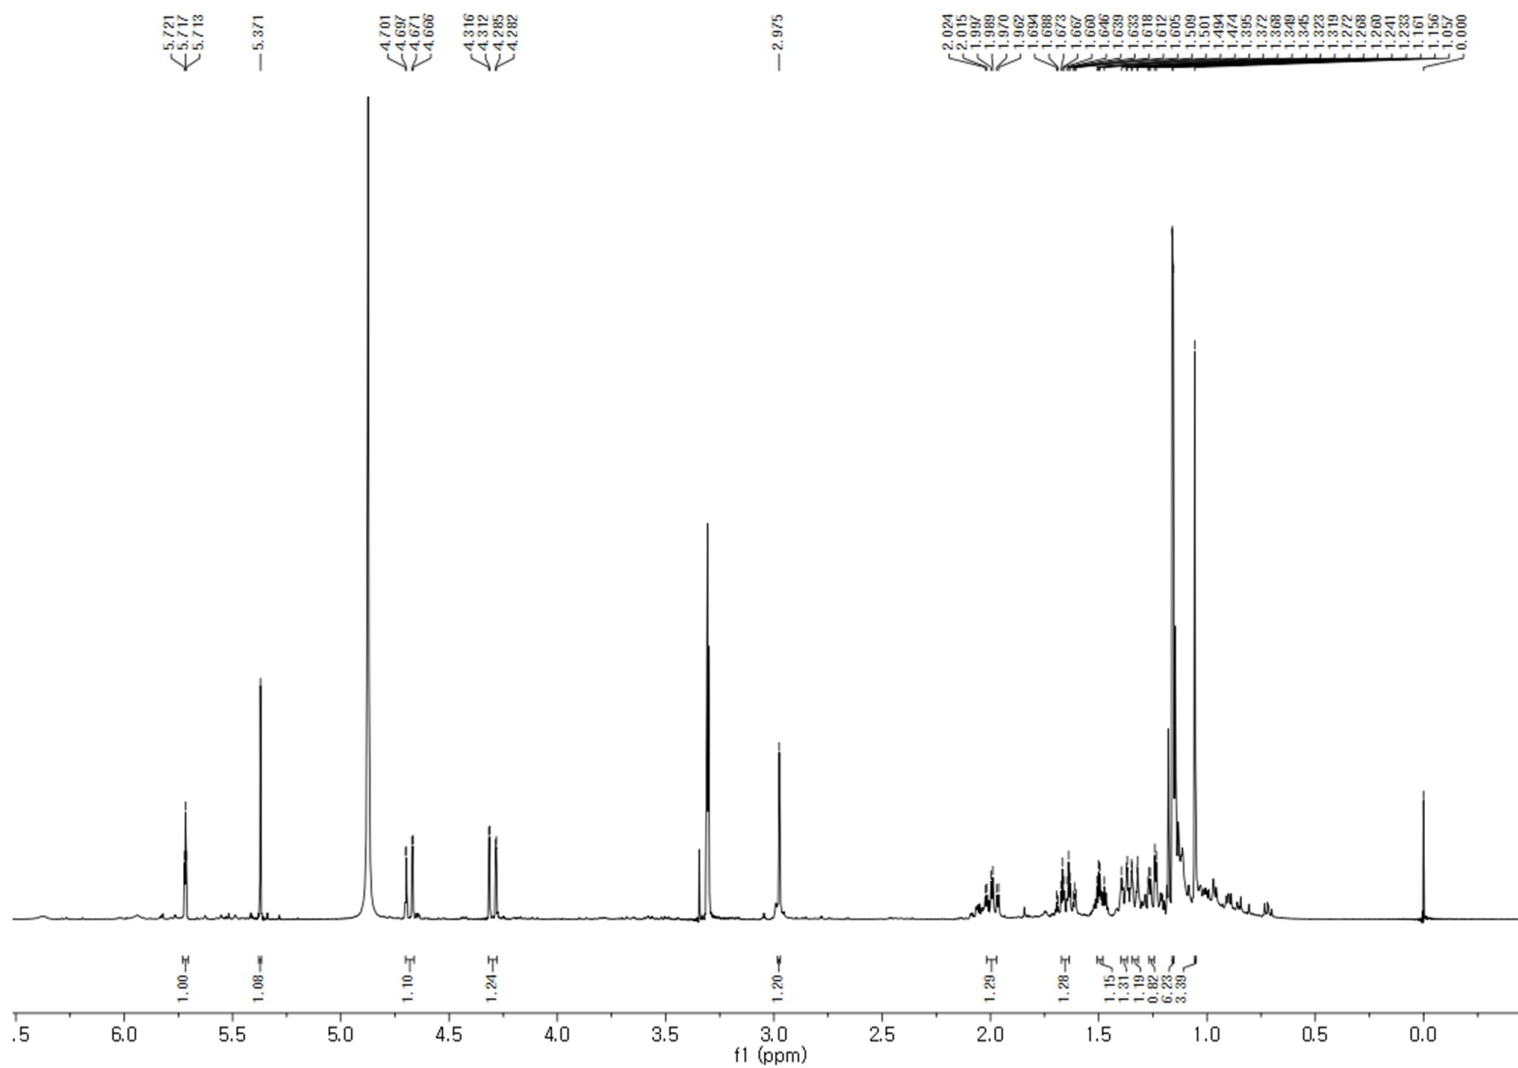

S37.  $^{13}\text{C}$  NMR spectrum (125 MHz) of 6-dehydroxy-6-oxopereniporin A (**6**) in  $\text{CD}_3\text{OD}$ .

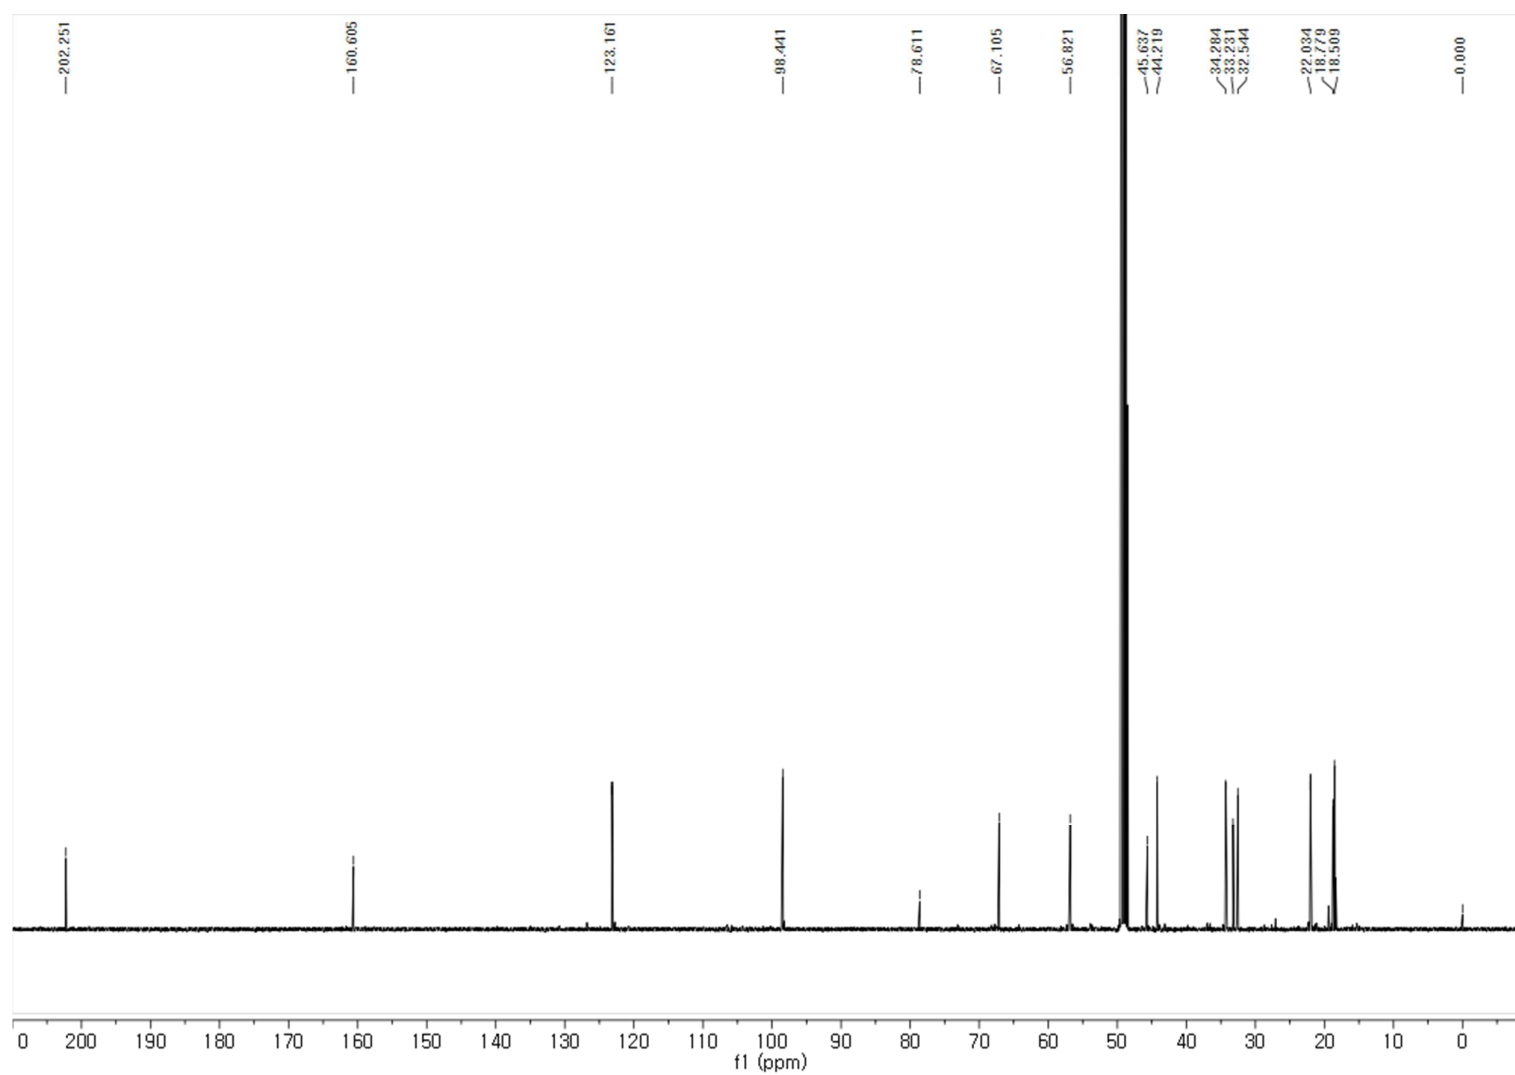

**S38.** HSQC NMR spectrum of 6-dehydroxy-6-oxopereniporin A (**6**) in CD<sub>3</sub>OD.

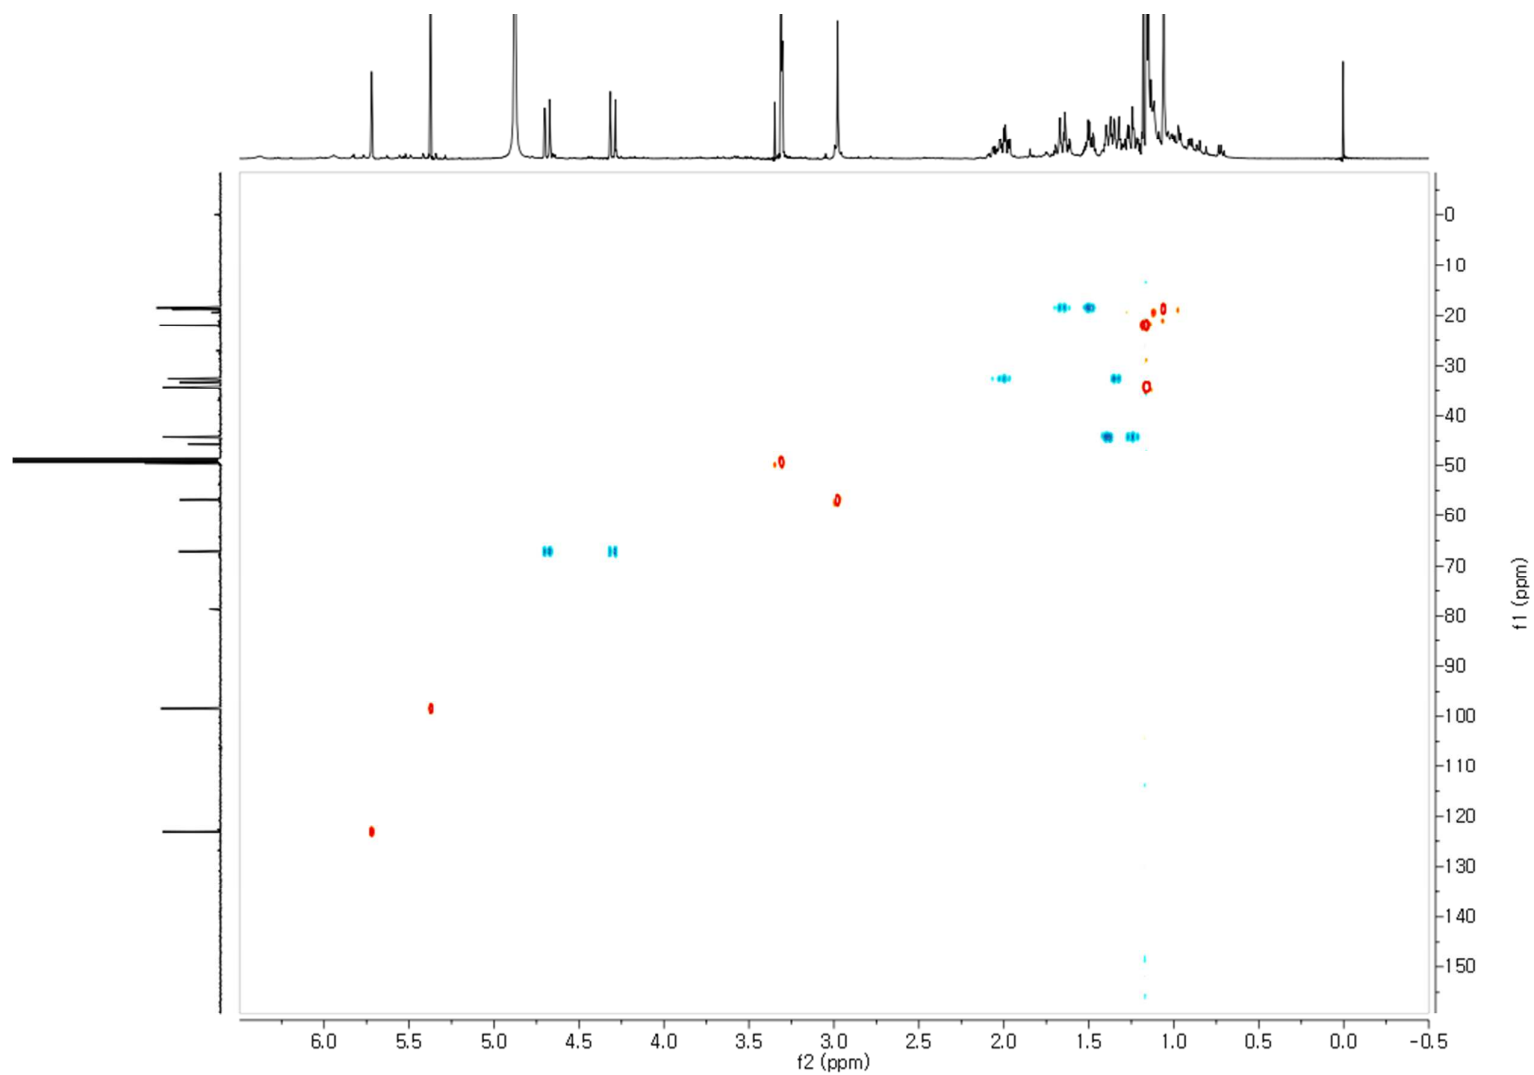

S39. HMBC NMR spectrum of 6-dehydroxy-6-oxopereniporin A (**6**) in CD<sub>3</sub>OD.

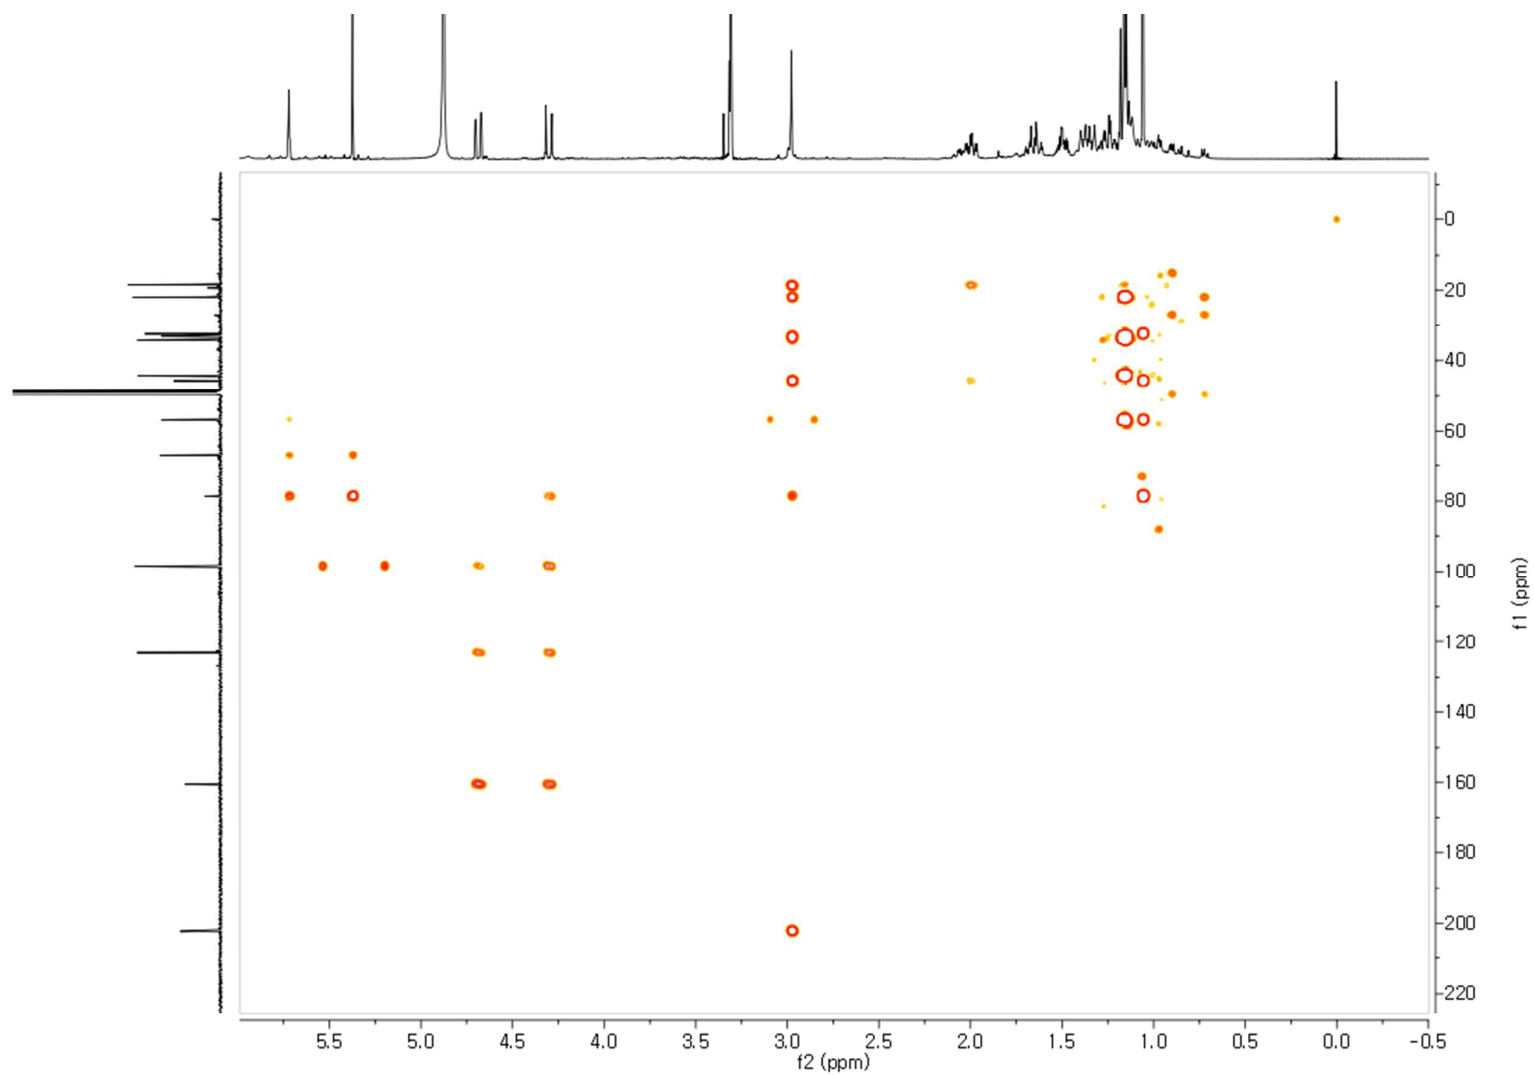

**S40.** COSY NMR spectrum of 6-dehydroxy-6-oxopereniporin A (**6**) in CD<sub>3</sub>OD.

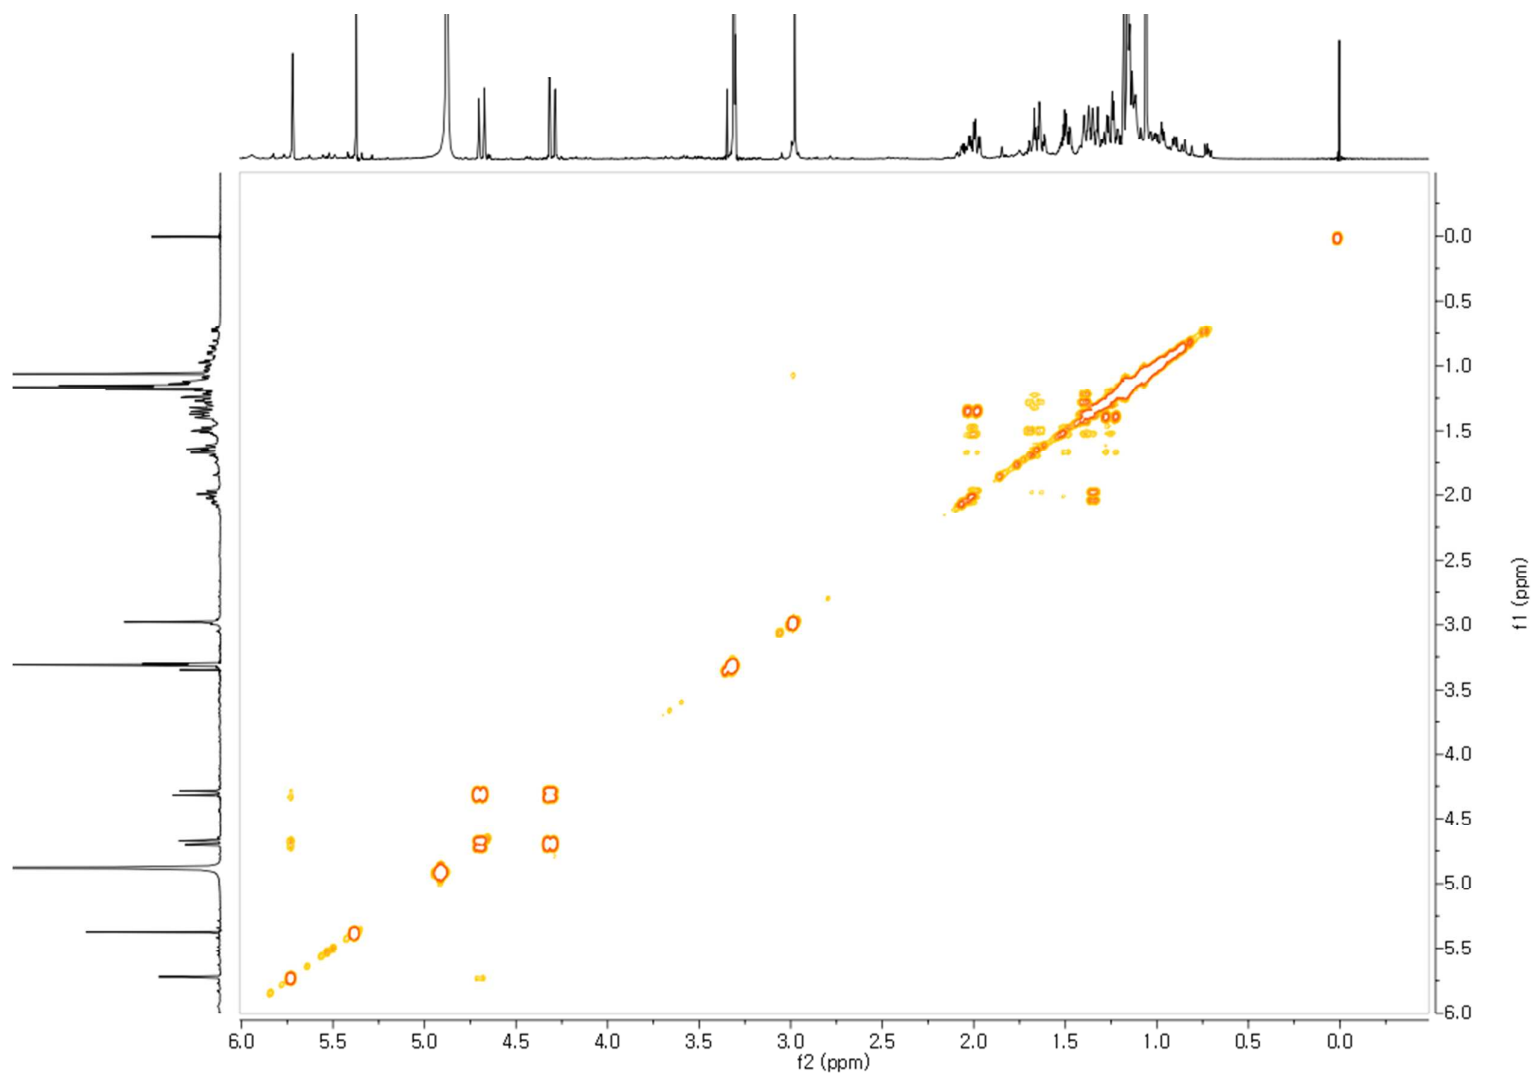



**S41.** NOESY NMR spectrum of 6-dehydroxy-6-oxopereniporin A (**6**) in CD<sub>3</sub>OD.

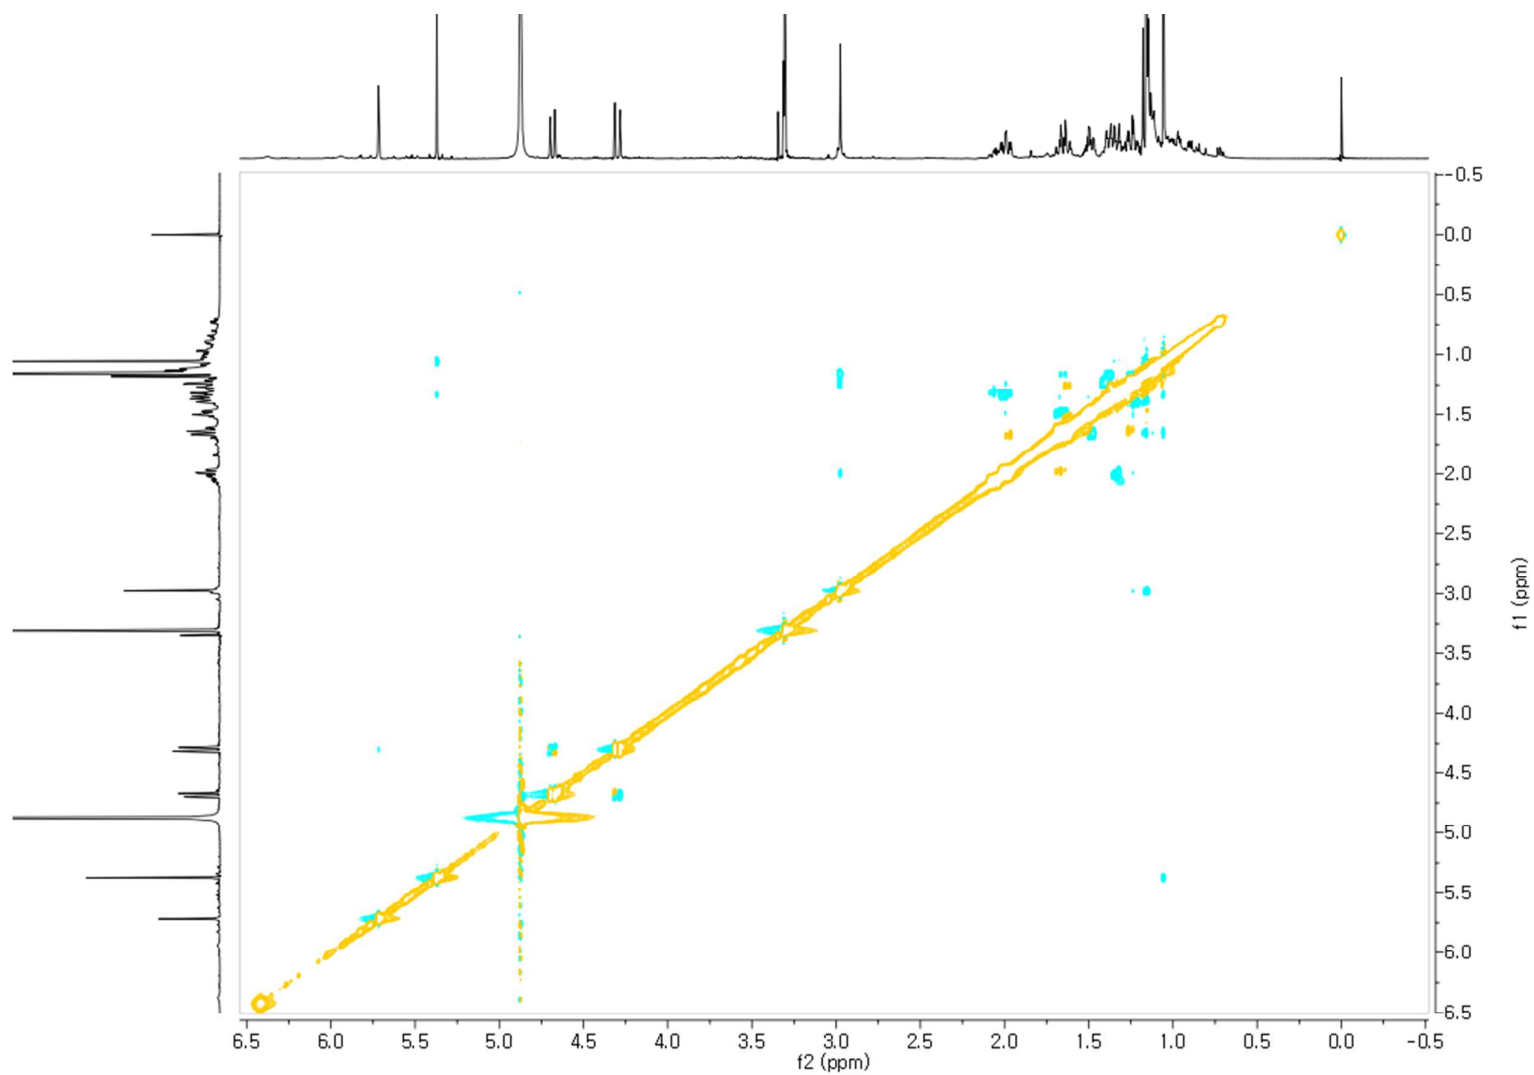

S42. HRESIMS spectrum of 6-dehydroxy-6-oxopereniporin A (6).

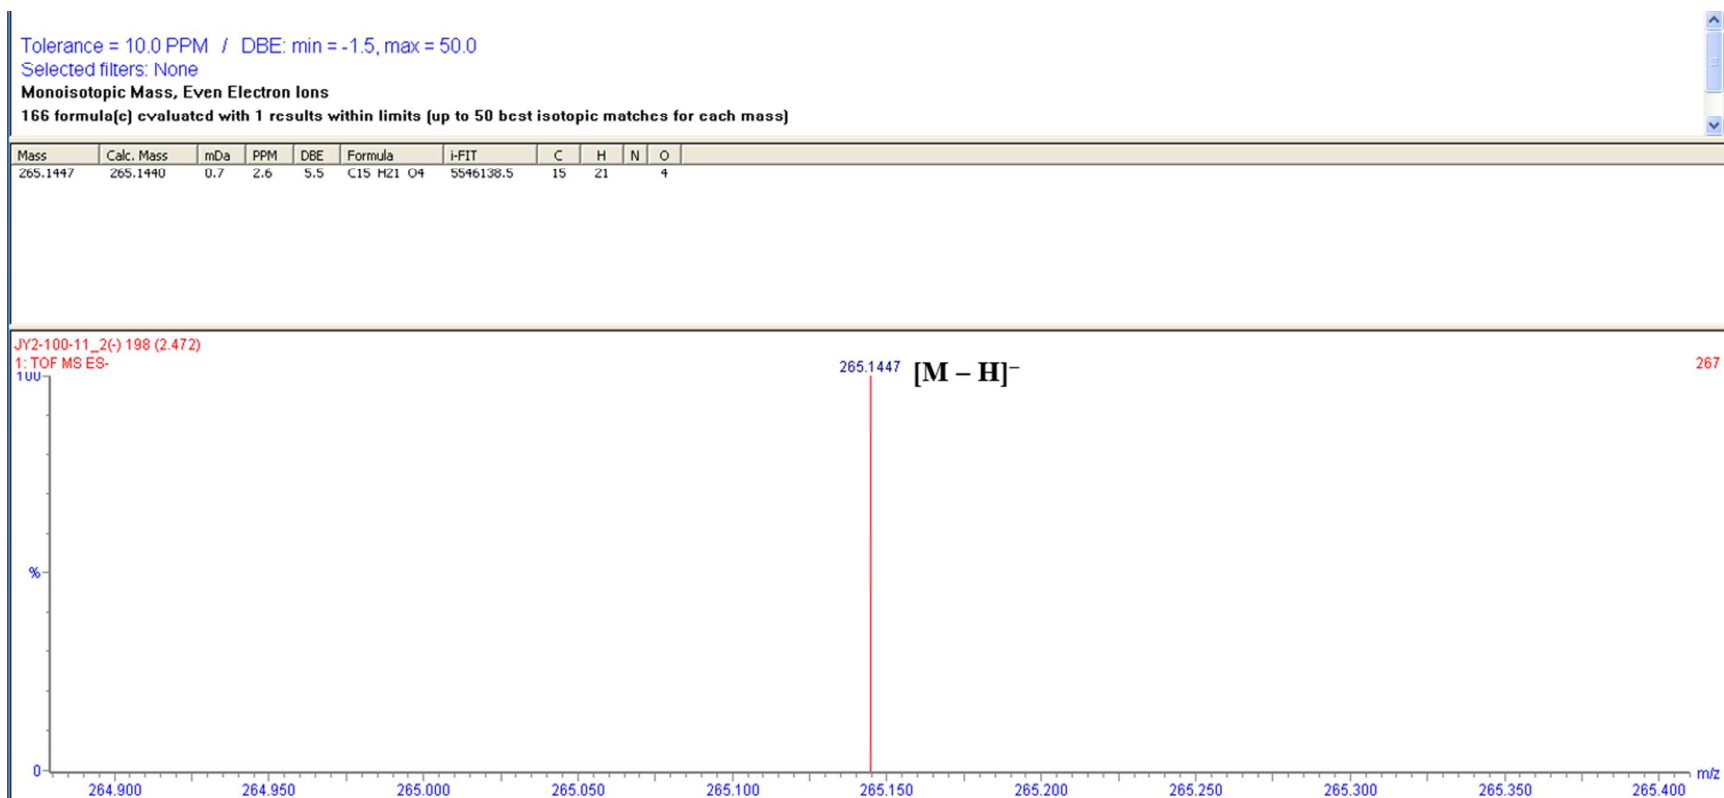

S43.  $^1\text{H}$  NMR spectrum (500 MHz) of pereniporin C (**7**) in  $\text{CD}_3\text{OD}$ .

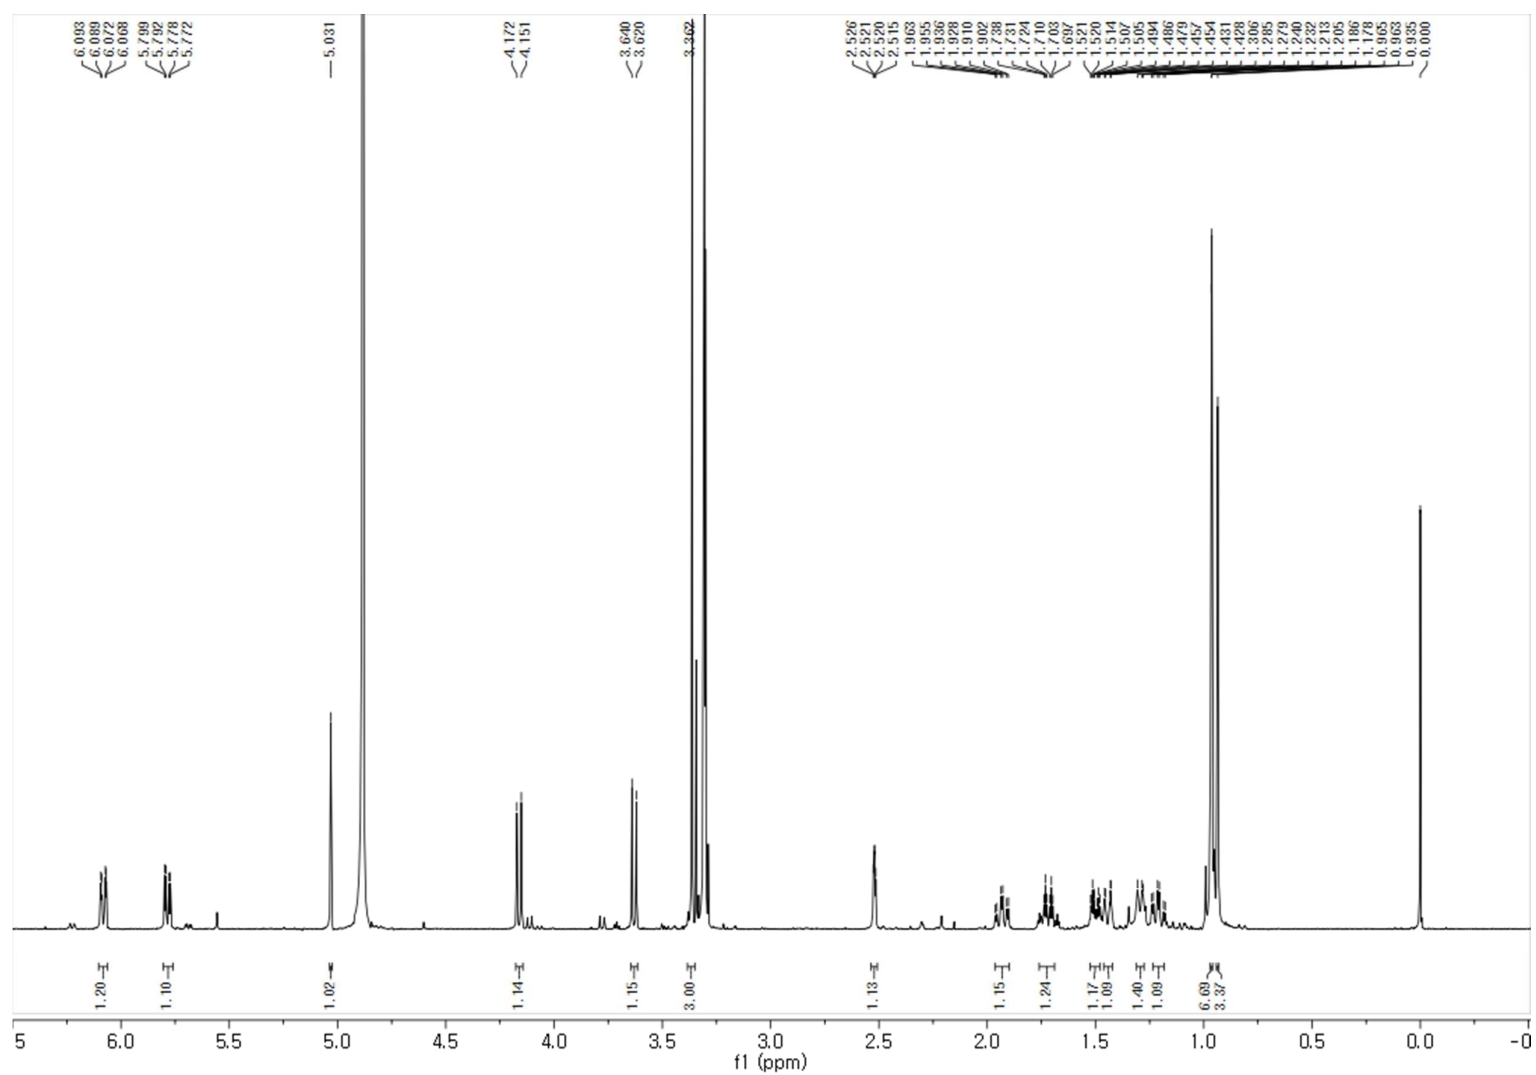

**S44.**  $^{13}\text{C}$  NMR spectrum (125 MHz) of pereniporin C (**7**) in  $\text{CD}_3\text{OD}$ .

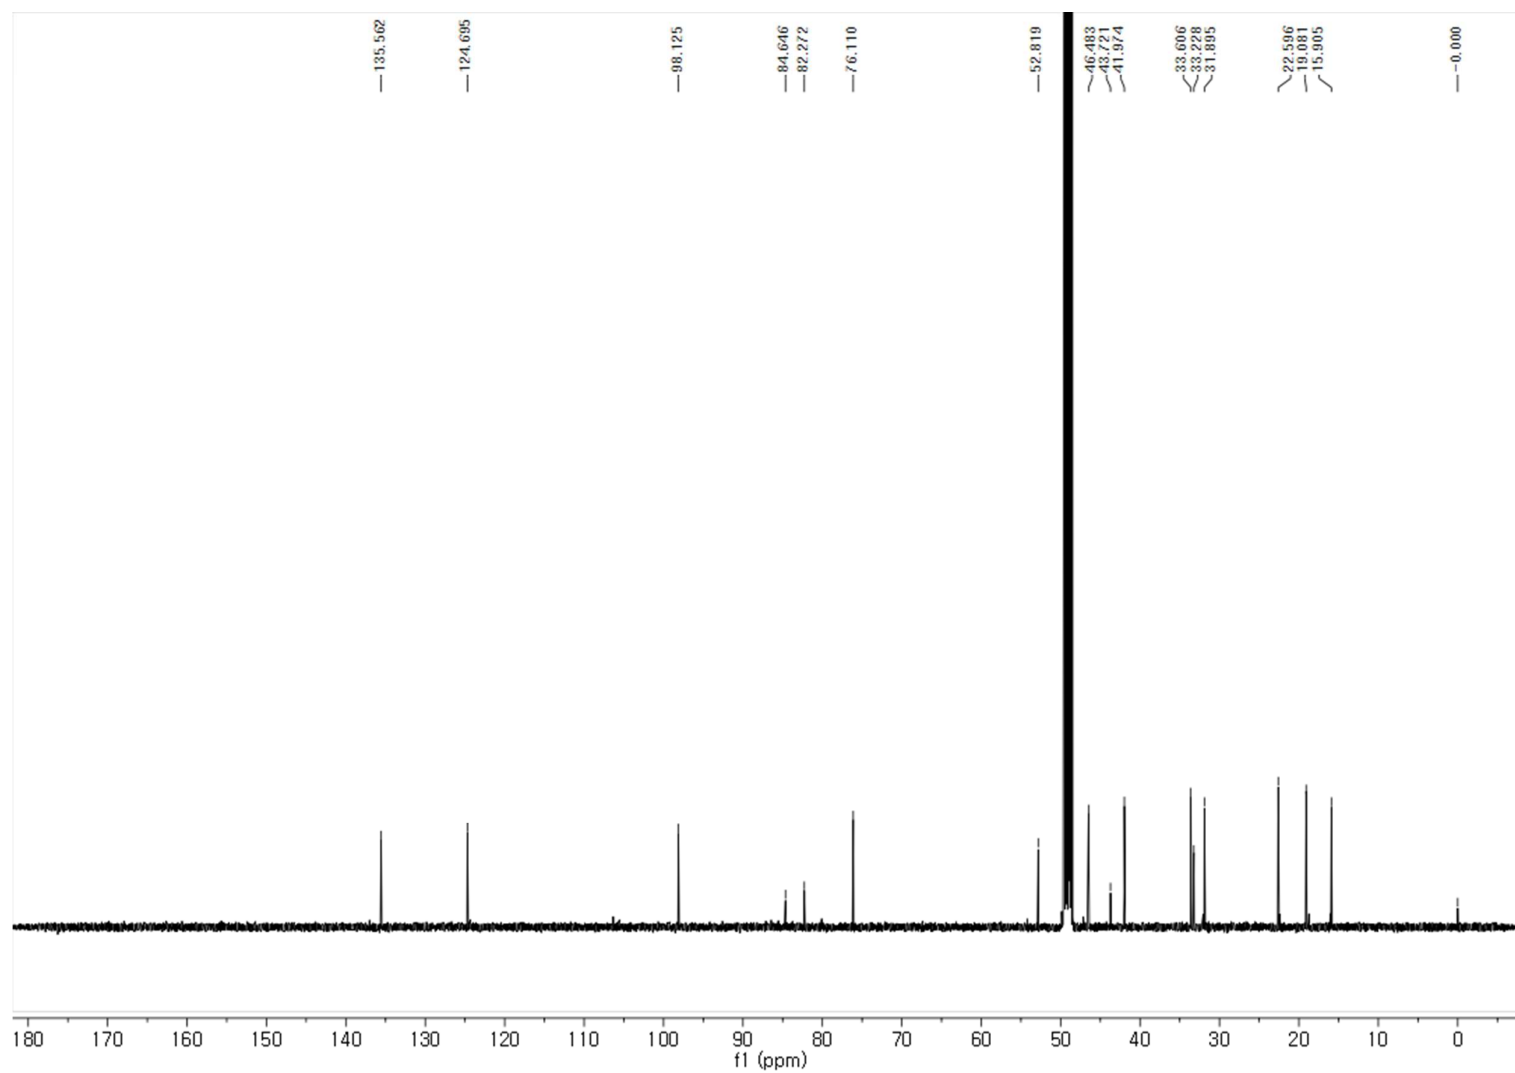

**S45.** HSQC NMR spectrum of pereniporin C (**7**) in CD<sub>3</sub>OD.

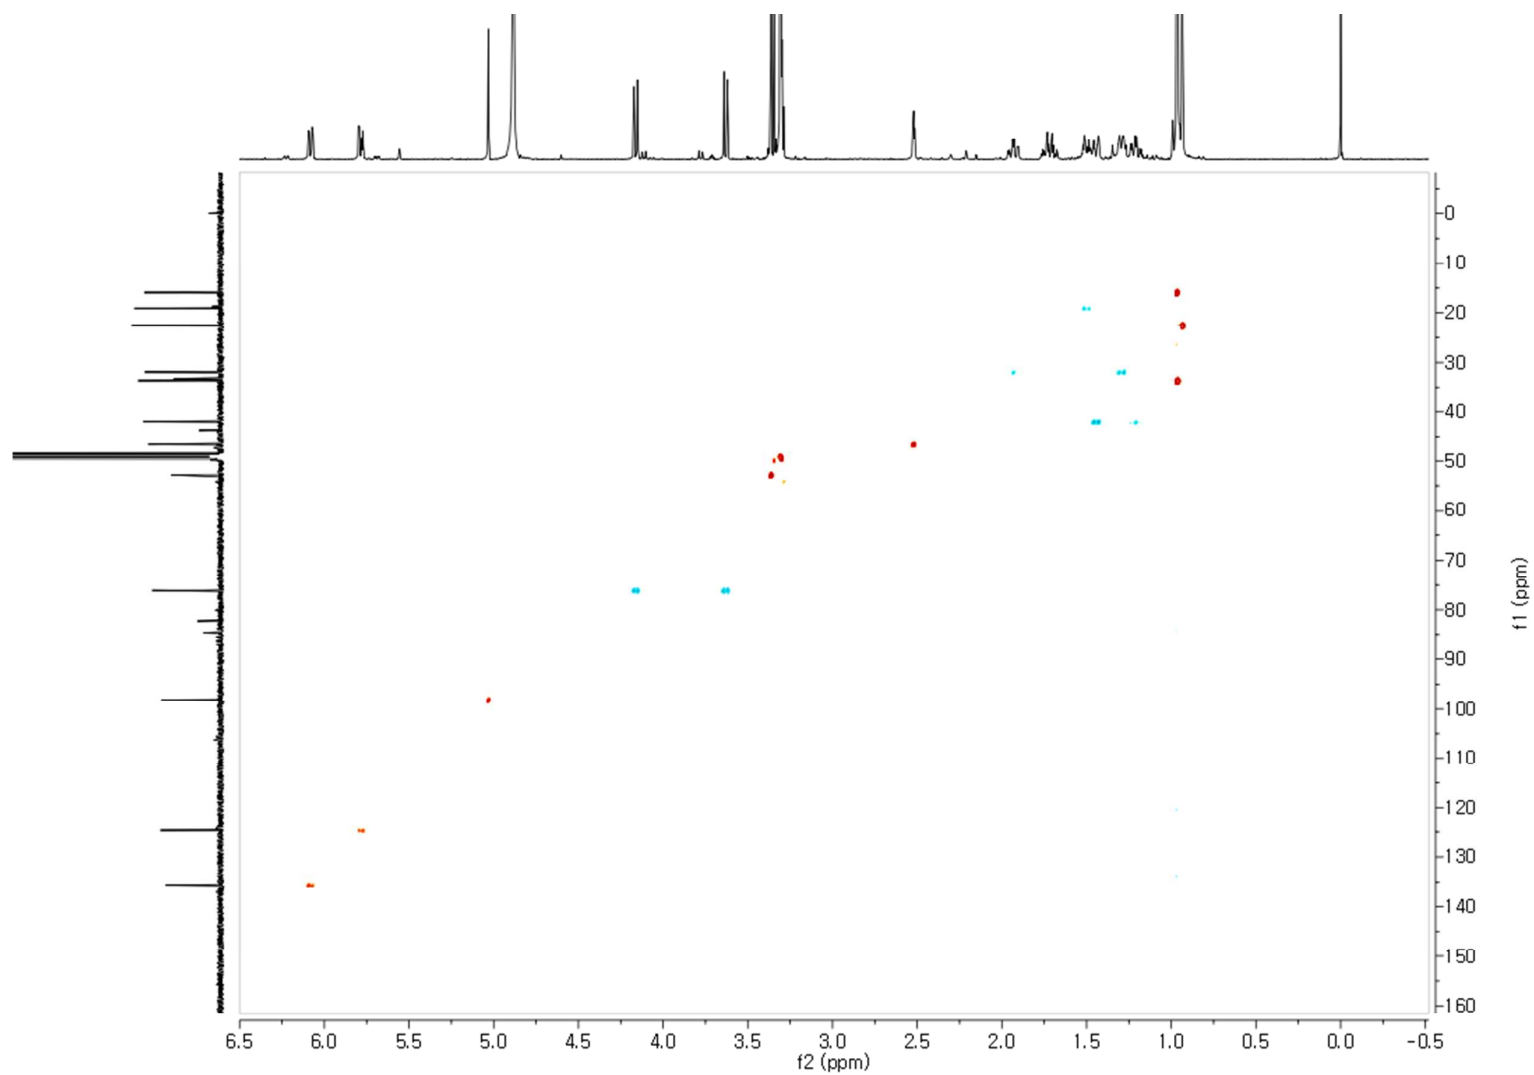

**S46.** HMBC NMR spectrum of pereniporin C (**7**) in CD<sub>3</sub>OD.

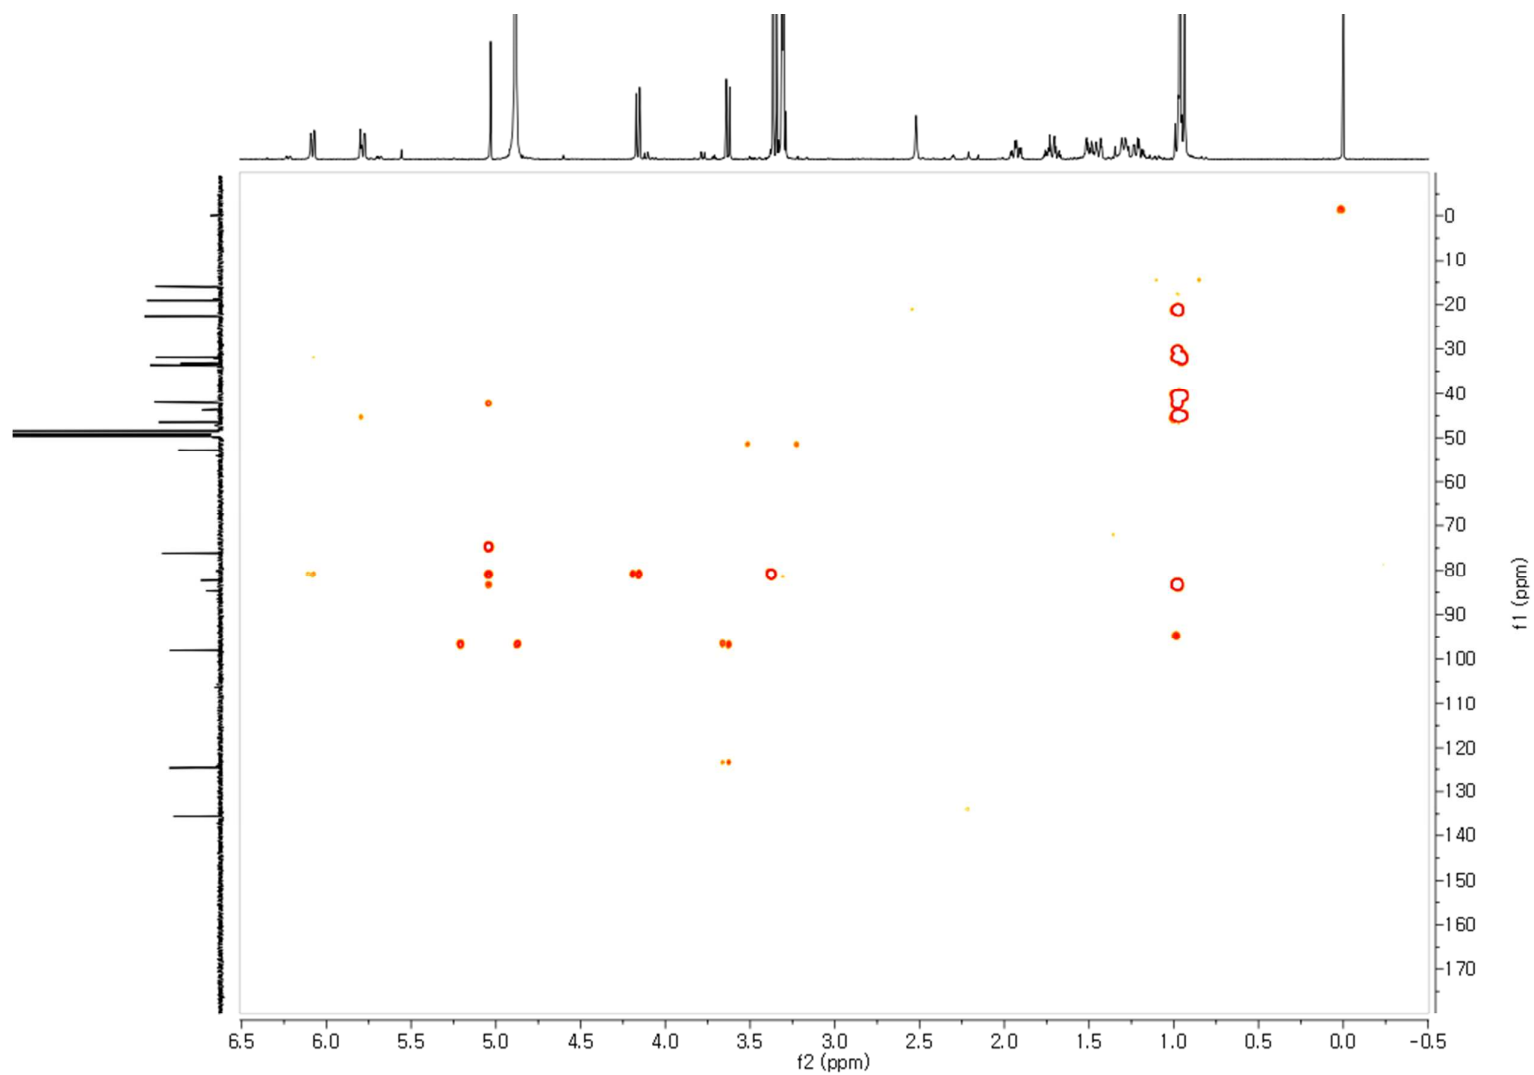

S47. COSY NMR spectrum of pereniporin C (7) in CD<sub>3</sub>OD.

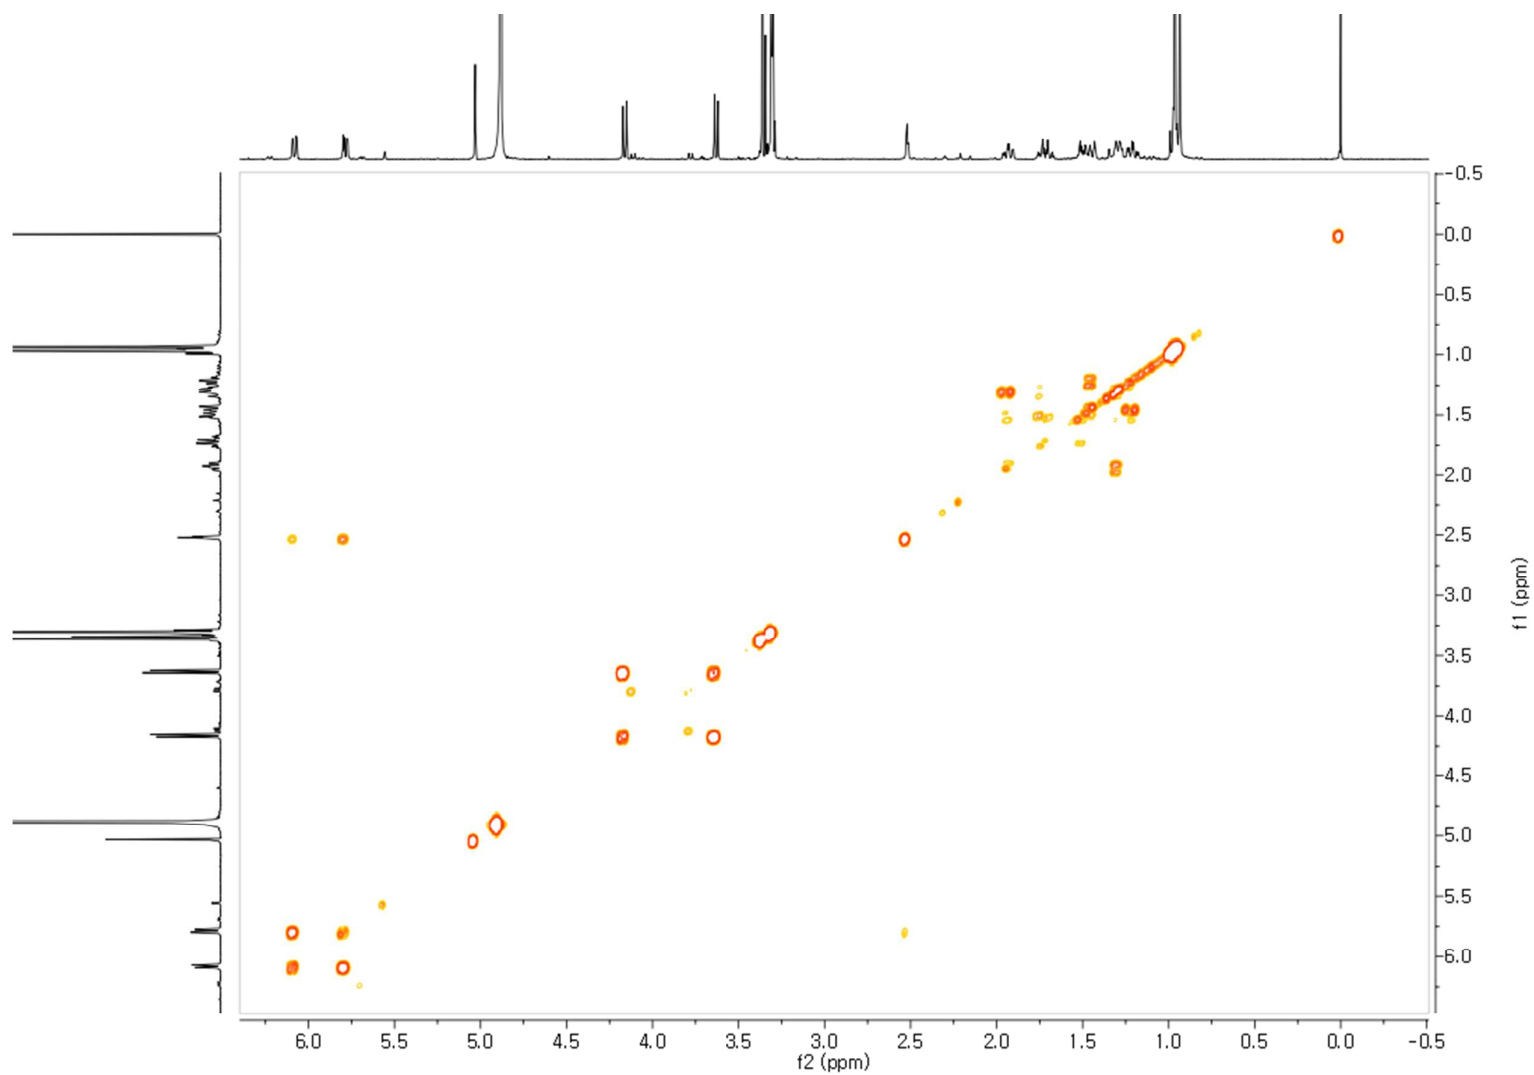

**S48.** NOESY NMR spectrum of pereniporin C (**7**) in CD<sub>3</sub>OD.

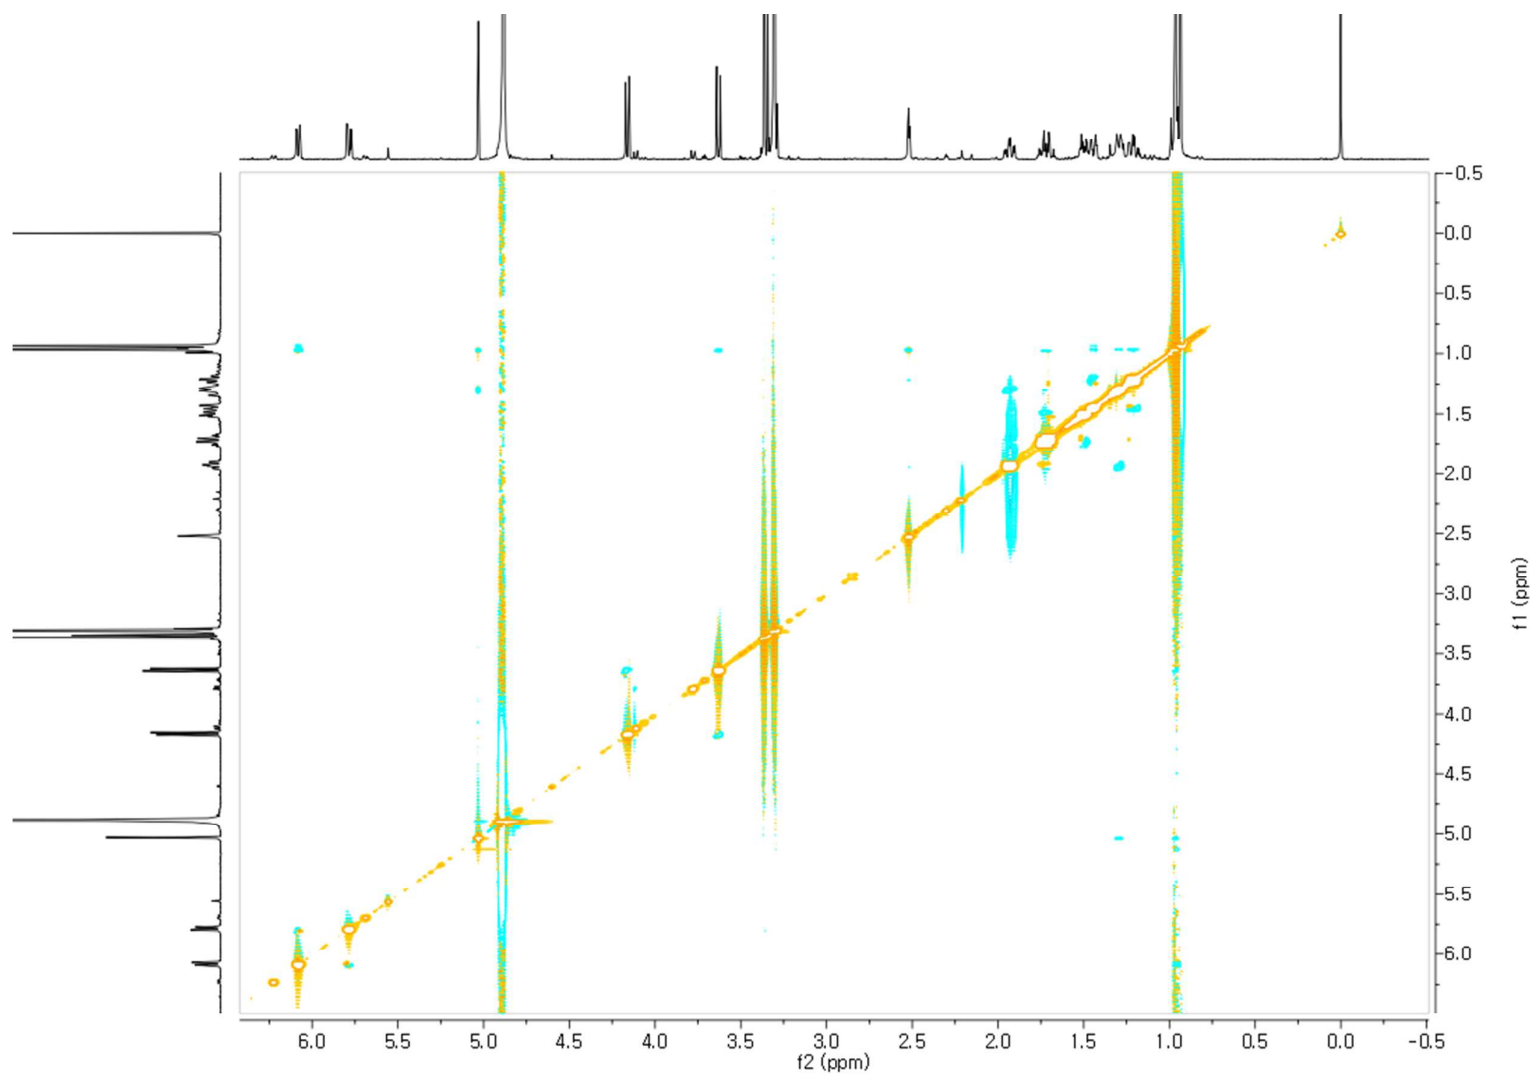



S49. HRESIMS spectrum of pereniporin C (7).

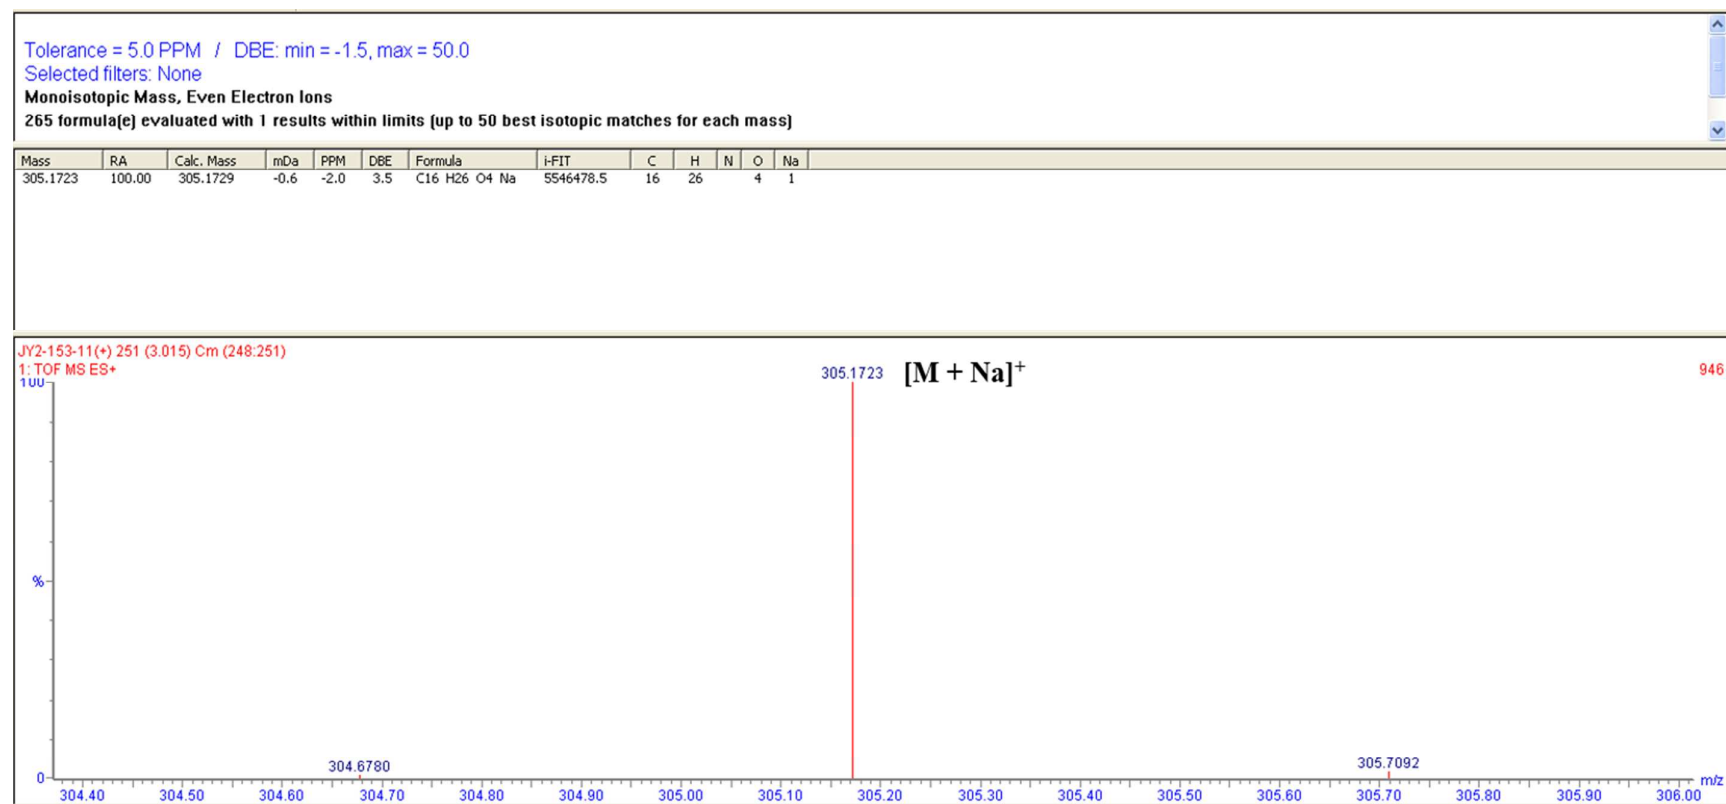

**S50.** NOESY correlations of compounds **2**, **4**, and **5** (A–C).

**(A)**

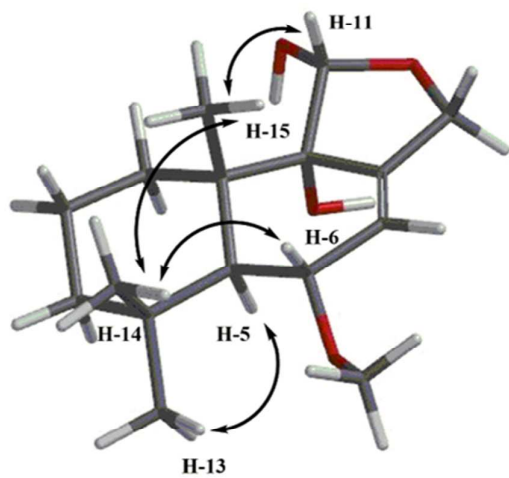

**(B)**

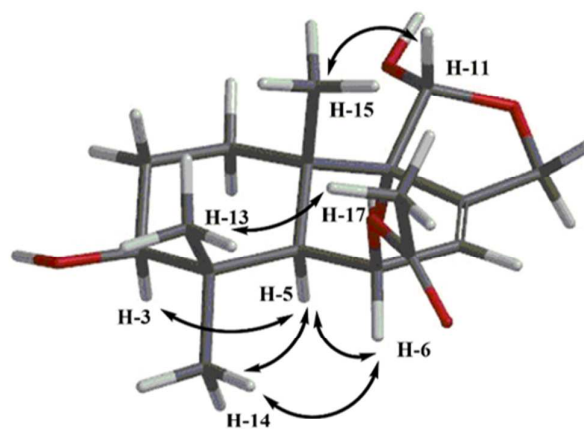

**(C)**

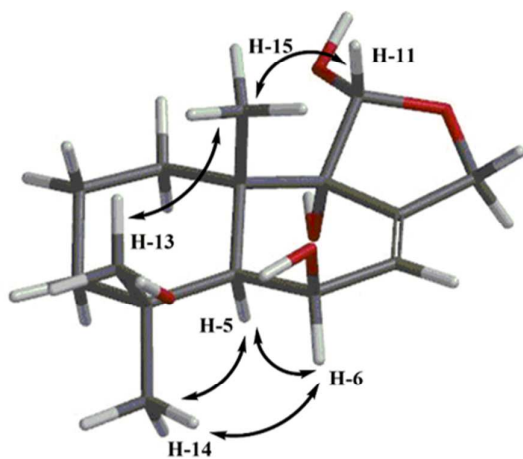

**S51.** Experimental and calculated ECD spectra of compounds **2**, **4**, and **5**.

**(A)**

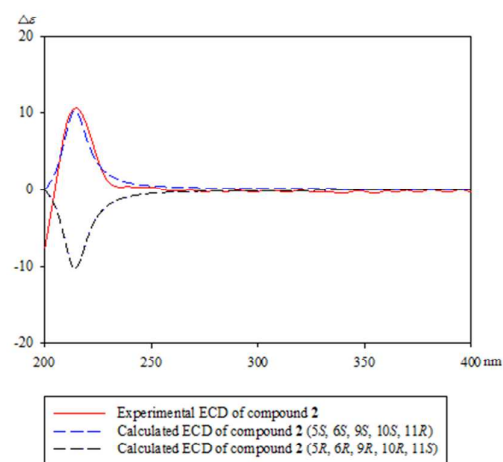

**(B)**

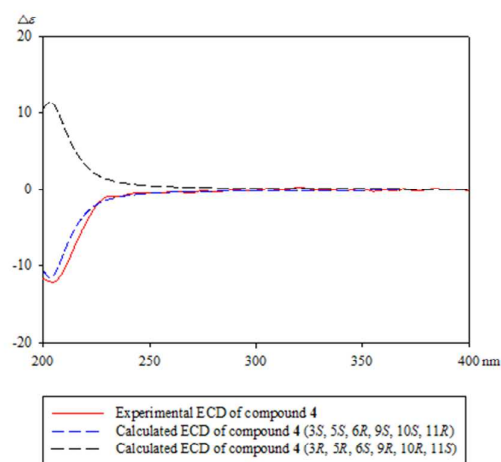

**(C)**

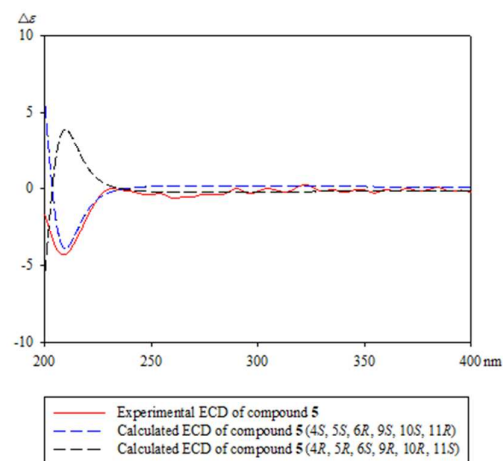

**S52.**  $^1\text{H}$  NMR spectroscopic data of known compounds.

*Pereniporin A*:  $^1\text{H}$  NMR ( $\text{CD}_3\text{OD}$ , 500MHz)  $\delta_{\text{H}}$  5.59 (1H, m, H-7), 5.25 (1H, s, H-11), 4.52 (1H, dt,  $J = 12.0, 2.0$  Hz, H-12a), 4.21 (1H, m, H-6), 4.12 (1H, dt,  $J = 12.0, 2.0$  Hz, H-12b), 1.91 (1H, m, H-1a), 1.82 (1H, d,  $J = 5.0$  Hz, H-5), 1.69 (1H, m, H-2a), 1.46 (1H, m, H-2b), 1.34 (3H, s, H-13), 1.33 (1H, m, H-3a), 1.28 (1H, m, H-3b), 1.26 (1H, m, H-1b), 1.14 (3H, s, H-15), 1.09 (3H, s, H-14)

*6-O-Acetyl-pereniporin A*:  $^1\text{H}$  NMR ( $\text{CD}_3\text{OD}$ , 500MHz)  $\delta_{\text{H}}$  5.60 (1H, m, H-6), 5.59 (1H, m, H-7), 5.32 (1H, s, H-11), 4.53 (1H, d,  $J = 13.0$  Hz, H-12a), 4.16 (1H, d,  $J = 13.0$  Hz, H-12b), 2.10 (1H, d,  $J = 4.0$  Hz, H-5), 2.04 (3H, s, H-17), 1.95 (1H, m, H-1a), 1.69 (1H, m, H-2a), 1.49 (1H, m, H-2b), 1.40 (1H, m, H-3a), 1.33 (1H, m, H-1b), 1.29 (1H, m, H-3b), 1.18 (3H, s, H-13), 1.18 (3H, s, H-15), 0.99 (3H, s, H-14)

*Ugandensolide*:  $^1\text{H}$  NMR ( $\text{CDCl}_3$ , 500MHz)  $\delta_{\text{H}}$  5.94 (1H, m, H-7), 5.93 (1H, m, H-6), 5.36 (1H, s, H-11), 4.61 (1H, d,  $J = 13.0$  Hz, H-12a), 4.26 (1H, d,  $J = 13.0$  Hz, H-12b), 1.85 (1H, d,  $J = 5.0$  Hz, H-5), 1.80 (1H, m, H-1a), 1.66 (1H, m, H-2), 1.48 (1H, m, H-2b), 1.36 (1H, m, H-3a), 1.31 (1H, m, H-1b), 1.28 (1H, m, H-3b), 1.26 (3H, s, H-13), 1.12 (3H, s, H-15), 1.04 (3H, s, H-14)

*11-Hydroxycinnamosmolide*:  $^1\text{H}$  NMR ( $\text{CD}_3\text{OD}$ , 500MHz)  $\delta_{\text{H}}$  6.54 (1H, d,  $J = 3.5$  Hz, H-7), 5.91 (1H, s, H-11), 5.76 (1H, m, H-6), 2.13 (1H, d,  $J = 5.0$  Hz, H-5), 2.03 (1H, m, H-1a), 1.69 (1H, m, H-2a), 1.53 (1H, m, H-2b), 1.42 (1H, m, H-3a), 1.31 (1H, m, H-1a), 1.29 (1H, m, H-3b), 1.17 (3H, s, H-13), 1.09 (3H, s, H-15), 0.97 (3H, s, H-14)

*6,9,11-Trihydroxycinnamolide*:  $^1\text{H}$  NMR ( $\text{CDCl}_3$ , 500MHz)  $\delta_{\text{H}}$  6.78 (1H, m, H-7), 5.81 (1H, s, H-11), 4.59 (1H, dd,  $J = 5.0, 4.0$  Hz, H-6), 1.96 (1H, m, H-1a), 1.83 (1H, d,  $J = 4.5$  Hz, H-5), 1.70 (1H, m, H-2a), 1.49 (1H, m, H-2b), 1.35 (3H, s, H-13), 1.33 (1H, m, H-3a), 1.29 (1H, m, H-3b), 1.26 (1H, m, H-1b), 1.14 (3H, s, H-15), 1.11 (3H, s, H-14)

**S53.** Structures of known compounds.

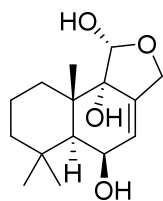

**Pereniporin A**

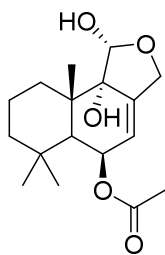

**6-O-Acetyl-pereniporin A**

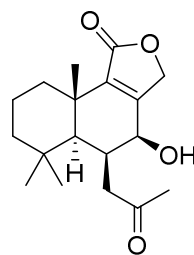

**Ugandensolide**

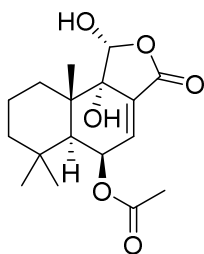

**11-Hydroxycinnamosmolide**

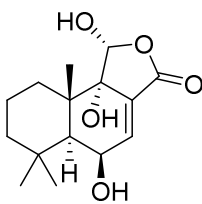

**6,9,11-Trihydroxycinnamolide**
